# Supplementary material for: Widespread Pesticide Distribution in the European Atmosphere Questions their Degradability in Air
Source: PubMed Central journal article supplement (PMC10882970; doi:10.1021/acs.est.3c08488), 2024-02-07
Supplement: es3c08488_si_001.pdf [file es3c08488_si_001.pdf]

## Supplementary Materials

### Widespread pesticide distribution in European atmosphere questions their degradability in air

*Ludovic Mayer<sup>1†</sup>, Céline Degrendele<sup>1,2†‡\*</sup>, Petr Šenk<sup>1</sup>, Jiří Kohoutek<sup>1</sup>, Petra Příbylová<sup>1</sup>, Petr Kukučka<sup>1</sup>, Lisa Melymuk<sup>1</sup>, Amandine Durand<sup>2</sup>, Sylvain Ravier<sup>2</sup>, Andres Alastuey<sup>3</sup>, Alex R. Baker<sup>4</sup>, Urs Baltensperger<sup>5</sup>, Kathrin Baumann-Stanzer<sup>6</sup>, Tobias Biermann<sup>7</sup>, Pernilla Bohlin-Nizzetto<sup>8</sup>, Dariusz Ceburnis<sup>9</sup>, Sébastien Conil<sup>10</sup>, Cédric Couret<sup>11</sup>, Anna Degórska<sup>12</sup>, Evangelia Diapouli<sup>13</sup>, Sabine Eckhardt<sup>8</sup>, Konstantinos Eleftheriadis<sup>13</sup>, Grant L. Forster<sup>4,14</sup>, Korbinian Freier<sup>15</sup>, François Gheusi<sup>16</sup>, Maria I. Gini<sup>13</sup>, Heidi Hellén<sup>17</sup>, Stephan Henne<sup>18</sup>, Hartmut Herrmann<sup>19</sup>, Adéla Holubová Šmejkalová<sup>20</sup>, Urmaz Hörrak<sup>21</sup>, Christoph Hüglin<sup>18</sup>, Heikki Junninen<sup>21</sup>, Adam Kristensson<sup>22</sup>, Laurent Langrene<sup>10</sup>, Janne Levula<sup>23</sup>, Marie Lothon<sup>16</sup>, Elke Ludewig<sup>6</sup>, Ulla Makkonen<sup>17</sup>, Jana Matejovičová<sup>24</sup>, Nikolas Mihalopoulos<sup>25</sup>, Veronika Mináriková<sup>24</sup>, Wolfgang Moche<sup>26</sup>, Steffen M. Noe<sup>27</sup>, Noemí Pérez<sup>3</sup>, Tuukka Petäjä<sup>23</sup>, Véronique Pont<sup>16</sup>, Laurent Poulain<sup>19</sup>, Etienne Quivet<sup>2</sup>, Gabriela Ratz<sup>15</sup>, Till Rehm<sup>28</sup>, Stefan Reimann<sup>18</sup>, Ivan Simmons<sup>29</sup>, Jeroen E. Sonke<sup>30</sup>, Mar Sorribas<sup>31</sup>, Ronald Spoor<sup>32</sup>, Daan P.J. Swart<sup>32</sup>, Vasiliki Vasilatou<sup>13</sup>, Henri Wortham<sup>2</sup>, Margarita Yela<sup>31</sup>, Pavlos Zampas<sup>25</sup>, Claudia Zellweger Fägi<sup>18</sup>, Kjetil Tørseth<sup>8</sup>, Paolo Laj<sup>33,23</sup>, Jana Klánová<sup>1</sup> and Gerhard Lammel<sup>1,34\*</sup>*

<sup>1</sup>Masaryk University, Faculty of Science, RECETOX, Brno, Czech Republic; <sup>2</sup>Aix-Marseille University, Laboratory of Chemistry and Environment (LCE), CNRS, Marseille, France; <sup>3</sup>Spanish Research Council (CSIC), Institute of Environmental Assessment and Water Research (IDAEA), Barcelona, Spain; <sup>4</sup>University of East Anglia, Centre for Ocean and Atmospheric Sciences, Norwich, United Kingdom; <sup>5</sup>Paul Scherrer Institute, Laboratory of Atmospheric Chemistry, Villigen, Switzerland; <sup>6</sup>GeoSphere Austria, Wien, Austria; <sup>7</sup>Lund University, Centre for Environmental and Climate Research, Lund, Sweden; <sup>8</sup>Norwegian Institute for Air Research (NILU), Kjeller, Norway; <sup>9</sup>School of Natural Sciences and Centre for Climate and Air Pollution Studies, Ryan Institute, University of Galway, Galway, Ireland; <sup>10</sup>ANDRA, DRD/GES Observatoire Pérenne de l'Environnement, Bure, France; <sup>11</sup>German Environment Agency (UBA), Zugspitze, Germany; <sup>12</sup>National Research Institute, Institute of Environmental Protection, Warsaw, Poland; <sup>13</sup>National Centre of Scientific Research Demokritos, Institute of Nuclear Radiological Science Technology, Energy and Safety, Agia Paraskevi, Greece; <sup>14</sup>National Centre for Atmospheric Sciences, University of East Anglia, Norwich, United Kingdom; <sup>15</sup>Bavarian Environment Agency, Augsburg, Germany; <sup>16</sup>University of Toulouse, Laboratoire d'Aérodologie, CNRS/IRD, Toulouse, France; <sup>17</sup>Finnish Meteorological Institute, Helsinki, Finland; <sup>18</sup>Swiss Federal Laboratories for Materials Science and Technology (Empa), Dübendorf, Switzerland; <sup>19</sup>Leibniz Institute for Tropospheric Research (TROPOS), Atmospheric Chemistry Department, Leipzig, Germany; <sup>20</sup>Czech Hydrometeorological Institute, National Atmospheric Observatory Košetice, Košetice, Czech Republic; <sup>21</sup>University of Tartu, Institute of Physics, Tartu, Estonia; <sup>22</sup>Lund University, Department of Physics, Lund, Sweden; <sup>23</sup>University of Helsinki, Institute for Atmospheric and Earth System Research (INAR), Helsinki, Finland; <sup>24</sup>Slovak Hydrometeorological Institute, Bratislava, Slovakia; <sup>25</sup>University of Crete, Department of Chemistry, Heraklion, Greece; <sup>26</sup>Environment Agency Austria, Wien, Austria; <sup>27</sup>Estonian University of Life Sciences, Institute of Forestry and Engineering, Tartu, Estonia; <sup>28</sup>Environmental Research Station Schneefernerhaus (UFS), Zugspitze, Germany; <sup>29</sup>UK Centre for Ecology and Hydrology, Penicuik, United Kingdom; <sup>30</sup>University of Toulouse, Géosciences Environnement Toulouse, CNRS/IRD, Toulouse, France; <sup>31</sup>National Institute for Aerospace Technology (INTA), Atmospheric Sounding Station El Arenosillo, Huelva, Spain; <sup>32</sup>National Institute for Public Health and the Environment

(RIVM), Bilthoven, Netherlands; <sup>33</sup>University Grenoble Alpes, Institut des Géosciences de l'Environnement, Grenoble, France; <sup>34</sup>Max Planck Institute for Chemistry, Multiphase Chemistry Department, Mainz, Germany

† these authors contributed equally to this work; ‡ now unemployed; \* corresponding authors: gerhard.lammel@recetox.muni.cz and celine.degrende@recetox.muni.cz

Number of pages (including the cover page): 70

Number of text sections: 5

Number of figures: 14

Number of tables: 18

## Tables of Contents:

|                                                                                                                                                                                                                                                                                                                            |     |
|----------------------------------------------------------------------------------------------------------------------------------------------------------------------------------------------------------------------------------------------------------------------------------------------------------------------------|-----|
| <b>Text:</b> Materials and methods.....                                                                                                                                                                                                                                                                                    | S7  |
| Sample preparation.....                                                                                                                                                                                                                                                                                                    | S7  |
| Sample analysis.....                                                                                                                                                                                                                                                                                                       | S7  |
| Quality assurance and quality control.....                                                                                                                                                                                                                                                                                 | S9  |
| Data analysis .....                                                                                                                                                                                                                                                                                                        | S10 |
| Literature review.....                                                                                                                                                                                                                                                                                                     | S11 |
| <b>Figures:</b>                                                                                                                                                                                                                                                                                                            |     |
| <b>Figure S1.</b> Map of the 29 sites participating to this study. Abbreviations of the sampling site described in Tables S1.....                                                                                                                                                                                          | S11 |
| <b>Figure S2.</b> 30 days footprint sensitivities (FLEXPART model) for the first, second and third sample collected at Zeppelin Observatory (ZPO) in which 0, 0 and 1 pesticide, respectively, were found in the particulate phase, in addition to, 1, 12 and 3 pesticides, respectively, found in the gaseous phase ..... | S12 |
| <b>Figure S3.</b> 30 days footprint sensitivities (FLEXPART model) for the first, second and third sample collected at Andøya (ADA) in which each one pesticide was found in the particulate phase, in addition to one, three and four pesticides, respectively, found in the gaseous phase .....                          | S13 |
| <b>Figure S4.</b> 30 days footprint sensitivities (FLEXPART model) for the first, second and third sample collected at Pallas Atmosphere-Ecosystem Supersite (PAL) in which one, zero and two pesticides were found in the particulate phase, respectively.....                                                            | S14 |
| <b>Figure S5.</b> 10 days backward trajectories (FLEXPART model) of the samples that were within the free troposphere at the mountain sites.....                                                                                                                                                                           | S15 |
| Figure S6. Number of pesticides quantified at each site in the particulate (all sites) and the gaseous phases (6 sites).....                                                                                                                                                                                               | S16 |
| <b>Figure S7.</b> Number of pesticides quantified in the particulate phase at each site. ....                                                                                                                                                                                                                              | S17 |
| <b>Figure S8.</b> Number of pesticides quantified in the particulate phase at each site category. The pesticides are classified according to their types and regulatory status in the European Union. ....                                                                                                                 | S18 |
| <b>Figure S9.</b> Concentrations in the particulate phase for the individual pesticides that showed a significant spatial variation between rural and coastal sites with the highest concentrations found at the rural sites .....                                                                                         | S19 |

**Figure S10.** Concentrations in the particulate phase for those individual pesticides that do not show a significant spatial variation between the different site categories .....S21

**Figure S11.** Hierarchical cluster analysis performed on the particulate phase concentrations of pesticides measured during the 1<sup>st</sup> sampling period (28-30.04.2020).....S27

**Figure S12.** Hierarchical cluster analysis performed on the particulate phase concentrations of pesticides measured during the 2<sup>nd</sup> sampling period (12-14.05.2020).....S28

**Figure S13.** Hierarchical cluster analysis performed on the particulate phase concentrations of pesticides measured during the 3<sup>rd</sup> sampling period (26-28.05.2020) .....S29

**Figure S14.** Pesticides identified as prone to long-range atmospheric transport (orange area, FT = free tropospheric), pesticides quantified in the planetary boundary layer (white area), and pesticides never observed (grey area) ordered along model estimate of characteristic travel distance. Not pictured is one pesticide never observed i.e., esbiothrin, due to unavailability of some input parameters. ....S30

**Tables:**

**Table S1.** Sampling methodology at the (A) rural, (B) coastal, (C) mountain and (D) polar sites. Site codes in bold where gas phase samples were also collected. ....S31

**Table S2.** Types of land-use within a 10 km radius for the rural, adjacent (A) and non-adjacent (B) to agricultural land, coastal (C), mountain (D) and polar (E) sites .....S35

**Table S3.** Allocation of this study land use categories to Corine Land Cover (A) and Global Land Cover (B) categories .....S37

**Table S4.** Information on the chemical analysis performed and standards used for individual herbicides (A), insecticides (B) and fungicides (C) .....S38

**Table S5.** Information on the individual herbicides (A), insecticides (B) and fungicides (C) analysed in this study .....S41

**Table S6.** Concentrations of individual pesticides (in pg m<sup>-3</sup>) observed in field blanks (FB, QFFs) for the rural (A), coastal (B), mountain and polar (C) sites. The average sampled volume at each site was used to estimate the concentrations. The cells in blue and orange

represent results lower than the instrumental limit of detection (iLOD) and the instrumental limit of quantifications (iLOQ), respectively.....S47

**Table S7.** Concentrations of individual pesticides (in  $\text{pg m}^{-3}$ ) observed in field blanks (FB, PUF-XAD2-PUF sandwiches) at all sites. The average sampled volume at each site was used to estimate the concentrations. The cells in blue and orange represent results lower than the instrumental limit of detection (iLOD) and the instrumental limit of quantifications (iLOQ), respectively.....S50

**Table S8.** Origin of air samples collected at mountain sites .....S51

**Table S9.** Quantification frequency (QF, in %) per site of individual pesticides present in the particulate phase .....S52

**Table S10.** Summary of pesticides previously quantified in the atmosphere of polar sites..S53

**Table S11.** Physico-chemical properties and half-lives in different environmental matrices of the individual herbicides (A), insecticides (B) and fungicides (C) analysed in this study ....S54

**Table S12.** Average particulate mass fraction ( $\theta$ , %) of pesticides measured at both rural and polar sites where both phases were sampled .....S57

**Table S13.** Selected HPLC-MS/MS experimental parameters, instrumental limits of detection (iLODs) and instrumental limits of quantification (iLOQs) .....S58

**Table S14.** Selected GC-MS/MS and UPLC-MS/MS experimental parameters, instrumental limits of detection (iLODs) and instrumental limits of quantification (iLOQs) .....S59

**Table S15.** Limits of quantifications determined from field blanks (LOQb) (in  $\text{pg m}^{-3}$ ).....S60

**Table S16.** Recoveries (in %) and standard deviations (SD) of individual herbicides (A), insecticides (B) and fungicides (C) analysed using HPLC-MS/MS determined from spike recovery tests of air sampling media (QFFs and PUF-XAD2-PUF sandwiches, n=5 each) .S61

**Table S17.** Results of the multiple linear regression statistical analysis applied to the number of pesticides found at each site.....S64

**Table S18.** Summary of pesticides previously quantified in the atmosphere at high mountain sites.....S65

**References**.....S66

## **Materials and Methods**

### **Sample preparation**

Prior to the extraction, all samples were spiked with labelled standards (Table S4). The samples were extracted with 5 mM of ammonium acetate in methanol using an automatic extractor (Büchi Extraction System, B-811, Switzerland). The extraction consisted of one-hour warm Soxhlet followed by one hour of solvent rinsing and then a concentration step to 1 mL under a gentle stream of nitrogen. The concentrated extracts were centrifuged for 10 min (12000 G, Z-36 HK, Hermle Labortechnik, Germany) within polypropylene tubes (Corning Costar Spin-X, USA), then filtered (cellulose acetate membrane and 0.22  $\mu\text{m}$  pore size) and concentrated to 0.5 mL under a gentle stream of nitrogen.

### **Sample analysis**

After extraction, the samples were divided into three 100  $\mu\text{L}$  aliquots, which underwent each a different analysis.

The first aliquot was analysed at RECETOX, in Brno (Czech Republic) by two different methods using a high-performance liquid chromatograph (HPLC, Agilent 1290, Agilent Technologies, USA) coupled to a mass spectrometer (QTRAP 5500, AB Sciex, Framingham, USA). The first analytical method used a Phenomenex Synergi Fusion C-18 column and formic acid in water and in methanol mobile phase gradient and has been explained in detail elsewhere<sup>15</sup>. This method allowed for the quantification of 28 analytes. Additionally, two new methods were developed using the same instruments allowing for the quantification of 23 analytes. Both of the new methods used an Acquity UPLC BEH C18 column (1.7  $\mu\text{m}$ , 100  $\times$  2.1 mm i.d., Waters, USA). However, the first new method used a non-linear binary pump gradient (increase in the mobile phase from 95% 0.1% formic acid in water (A) and 5% 0.1% formic acid in methanol (B) at 0 minutes to 100% B at 5.75 minutes, then decrease to 5% B at 8.5 minutes for equilibration at initial conditions (5% B). The total time of analysis was 11.5 min with a flow rate of the mobile phase of 0.30 mL min<sup>-1</sup>. For this method, 10  $\mu\text{L}$  of individual sample was injected. Ions were detected in positive mode. The ionization parameters were as follows: desolvation temperature 550°C; curtain gas 35 psi, ion source gas 1 30 psi and ion source gas 2 at 60 psi. For the second new method, a non-linear binary pump gradient was used (increase in the mobile phase from 95% 1 mM ammonium acetate in water (A) and 5% 1 mM ammonium acetate in acetonitrile (B) at 0 minutes to 100% B at 5.75 minutes, then decrease to 5% B at 8.5

minutes for equilibration at initial conditions (5% B). The total time of analysis was 10 min with a flow rate of the mobile phase of 0.40 mL min<sup>-1</sup>. For this method, 10 µL of individual sample was injected. Ions were detected in negative mode. The ionization parameters were as follows: desolvation temperature 450°C; curtain gas 20 psi, ion source gas 1 50 psi and ion source gas 2 at 30 psi. The remaining parameters were the same as for the initial method, previously described <sup>15</sup>.

The second and third methods were analysed at the Laboratory of Chemistry and Environment, Aix-Marseille University, Marseille (France) and required a solvent transfer from methanol to acetonitrile. A gas chromatograph (GC, GC Ultra, Thermo Scientific, USA) coupled to a tandem mass spectrometer (MS/MS, TSQ Quantum™ triple quadrupole, Thermo Scientific, USA) using electron impact ionization and an ultra-performance liquid chromatograph (UPLC Acquity, Waters, USA) coupled to a MS/MS (quadrupole time-of-flight mass spectrometer Synapt G2 HDMS, Waters, USA) equipped with an electrospray ion source were used. Further details about these methods are described elsewhere <sup>16</sup>. However, different settings were used for the GC-MS/MS analysis: the interface temperature was 250 °C and the holding step was 3 min at 35 °C.

The precursor to product ions were monitored in scheduled multiple reaction monitoring mode (MRM) (Tables S13-and S14). The identification of individual pesticides was based on the comparison of intensity ratios of ions and retention times with standards and quantification was done using internal calibration with deuterated standards (Table S4).

Overall, the three analyses allowed for the quantification of 76 pesticides (35 herbicides, 22 insecticides and 19 fungicides) belonging to 34 chemical classes (Table S5). These compounds were chosen according to results from previous monitoring studies <sup>15,16</sup>, but also global pesticide usage <sup>72</sup> and their potential harmful effects to environmental and human health <sup>73,74</sup>. Among these 76 CUPs analysed (based on the analytical methods available), 40 have been approved for agricultural use in Europe <sup>75</sup>, 22 are among the most used pesticides globally <sup>72</sup>, 34 are characterized as priority active ingredients that need to be monitored in France <sup>73</sup>, 13 as highly hazardous pesticides and 25 as high-risk pesticides <sup>74</sup>.



## Quality assurance and quality control

In addition to the air samples collected, 35 field blanks (i.e., 29 QFFs and six sandwiches of PUF/XAD/PUF) were analysed as per sample. These field blanks were placed for several seconds within the sampler without air being pumped. Moreover, five solvent blanks were also analysed. In general, blank levels of most individual analytes were below detection or otherwise low (Tables S6 and S7). The concentrations of individual pesticides reported here were blank corrected by subtracting the average of the corresponding field blanks.

The concentrations measured in the samples were compared to the instrumental limits of detection (iLODs) and quantification (iLOQs), which were determined by distinguishing the quantity of analytes with a signal-to-noise ratio of 3:1 and 10:1, respectively. We defined the limit of quantification as the maximum between iLOQ and the limit of quantification determined from field blanks (LOQb). LOQb were determined as the average of the concentration of a pesticide found in the field blanks plus three-times their standard deviations (Table S15). Therefore, LOQb allows for discriminating between “contaminated” blanks and analyte concentration present in environmental samples.

The recoveries of individual pesticides were assessed by spiking sampling media (i.e., five QFFs and five PUF/XAD2/PUF sandwiches) with the native standards and their corresponding isotopic labelled standards, which were then processed as per sample.

For the 51 pesticides analysed using the HPLC-MS/MS, the recoveries of individual analytes ranged from 52 %  $\pm$  27 (iprovalicarb) to 152 %  $\pm$  20 (fenpropimorph) for QFFs and from 34.1 %  $\pm$  13 (diazinon) to 116 %  $\pm$  5.90 (phosalone) for sandwiches (Table S16). Besides few exceptions, most of the procedural recoveries were in the range of 60–120% and had standard deviations lower than 20%. For these 51 pesticides, the concentrations have been adjusted for recoveries by the instrumental software during data acquisition and treatment of the selected precursor-to-products ions reaction mass chromatograms. For the remaining pesticides, the extraction recoveries were taken into account for calibration by applying the experimental protocol used for the samples to a blank matrix spiked with calibration standards. For these analyses, the recovery results were within the acceptable range, 60-120%.

## Data analysis

All statistical analyses were performed using the software GraphPad Prism® (v9.0.0). Concentrations that were lower than iLOD, iLOQ or LOQb were not taken into account. Substitutions of values below LOQ by LOQ/2 were used to determine the relative standard deviation (Table 1).

The quantification frequencies per site of individual pesticides were calculated (Table S9) as well as the number of pesticides quantified in the particulate phase at each site (Figures S3 and S4).

Multiple linear regressions were performed to study a possible influence of the site category and the percentage of agricultural areas surrounding each site on the number of pesticides quantified in the particulate phase and on the concentrations of individual pesticides (Table S17). For those parameters that were significant, regressions were tested (Figure 1). The influence of latitude on the number of pesticides found in European air was assessed by using a 3<sup>rd</sup> order polynomial regression to test the null hypothesis, which expects the pesticide distribution to follow the cropland's meridional distribution (Figure 1). In the study region (30 – 80°N/-10 – 30°E), the regression shows a minimum at latitudes with high area fraction of sea and a maximum at central European latitudes.

A hierarchical cluster analysis was performed to assess the similarities in terms of the particulate concentration profile of pesticides at the 29 sites (Figures S7 to S9). This analysis was performed for each of the three sampling periods.

The differences in the concentrations of pesticides measured at each site category were assessed using a non-parametric Mann-Whitney test when concentrations were available for at least two categories while a non-parametric Kruskal-Wallis test was used when data were available for three or four categories of sites (Figures S5 and S6). We considered a *p*-value <0.05 to be statistically significant.

Figure 2, S1 and S2 were done using the geographic information system software ArcGIS pro® (v2.5.0) and Figure 3 using Microsoft Excel® (v2202).

## Literature review

A review on the current-use pesticides (other than the legacy organochlorine pesticides) that were previously reported in the atmosphere of polar and mountain sites was performed (Tables S10 and S18).

In addition, information related to organic matter concentrations was taken from the EBAS Database (<https://ebas.nilu.no/>).

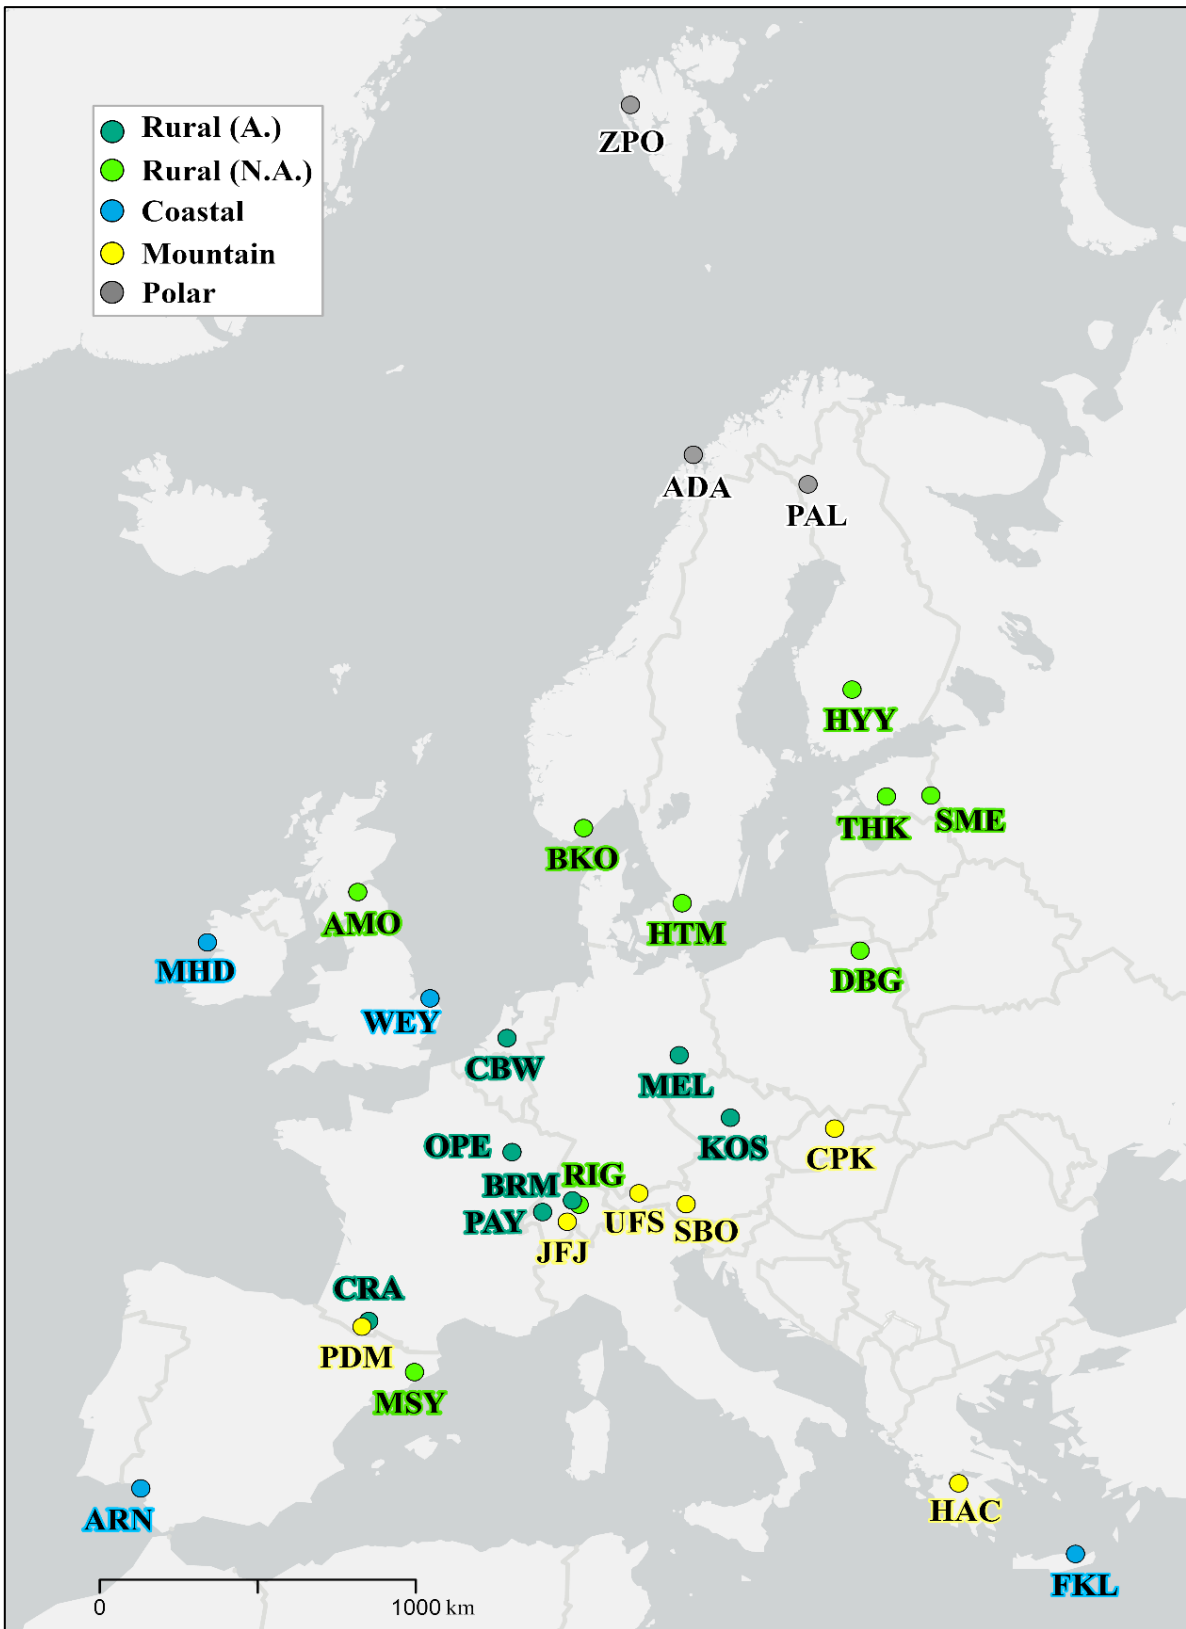

**Figure S1.** Map of the 29 sites participating to this study. Abbreviations of the sampling site described in Tables S1

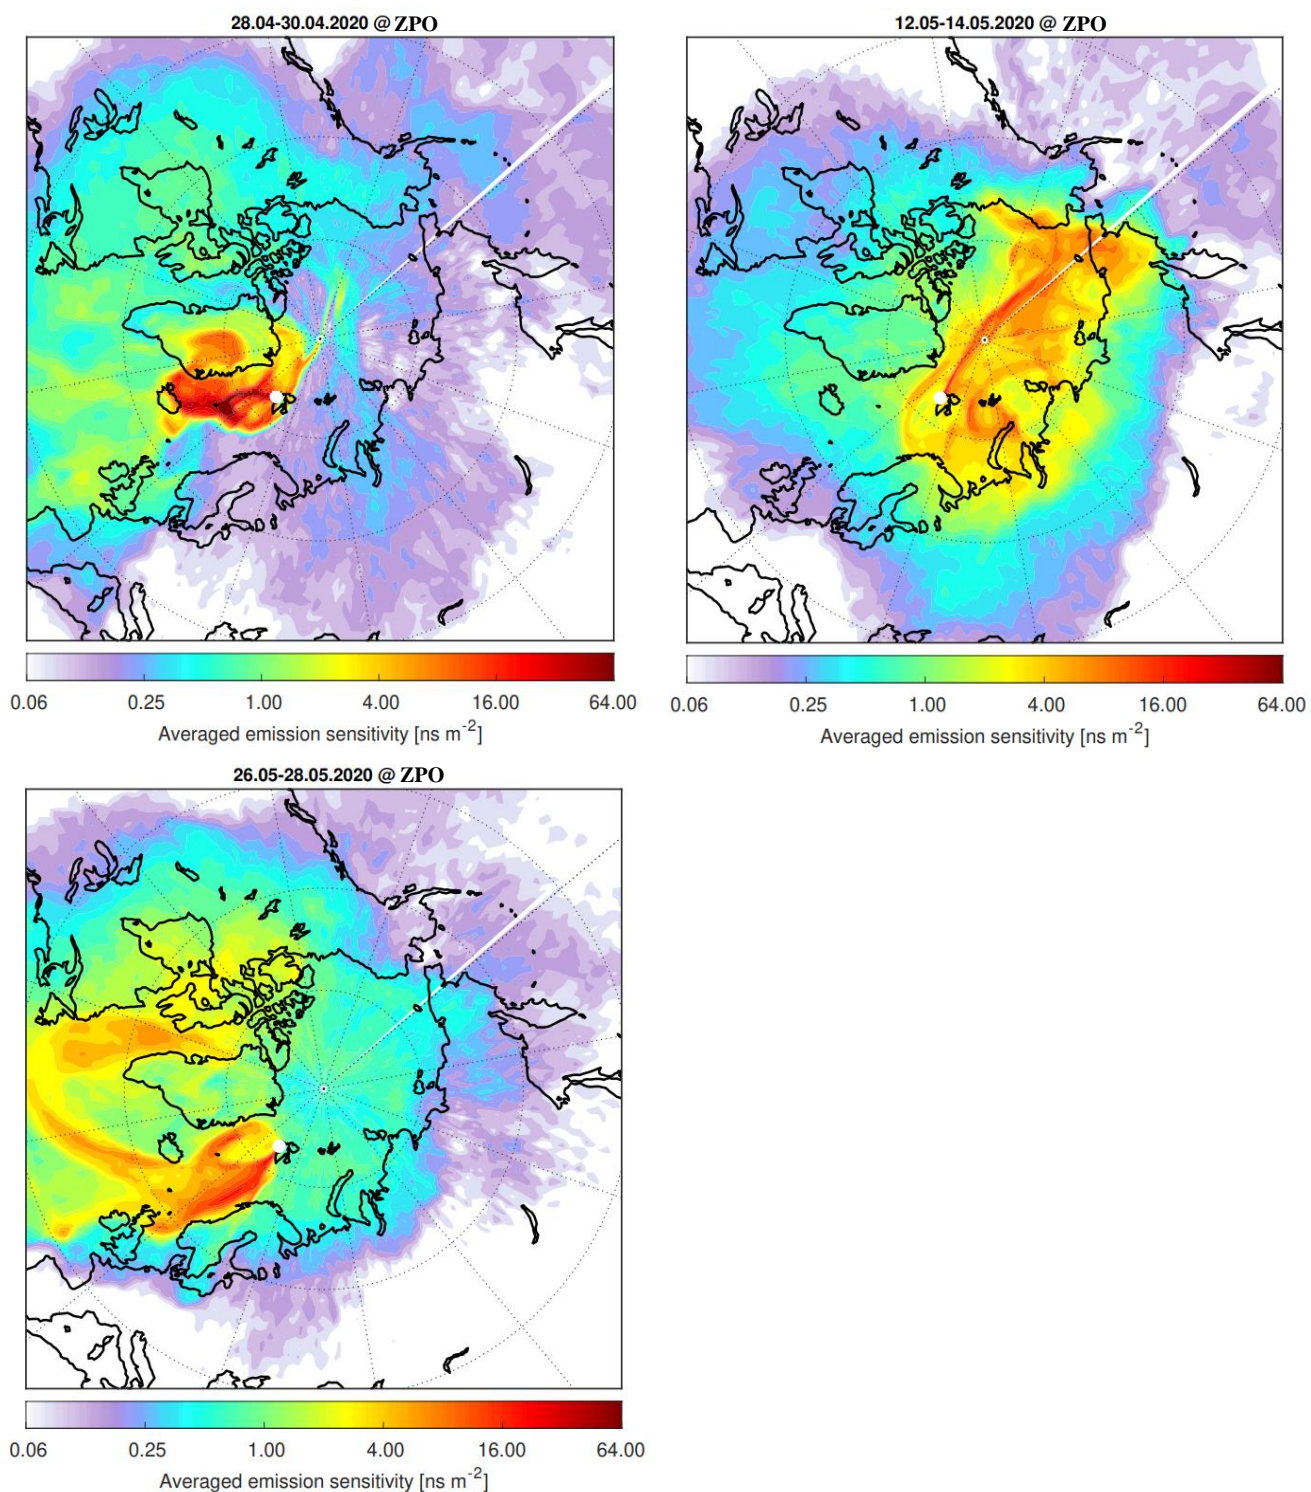

**Figure S2.** 30 days footprint sensitivities (FLEXPART model) for the first, second and third sample collected at Zeppelin Observatory (ZPO) in which 0, 0 and 1 pesticide, respectively, were found in the particulate phase, in addition to, 1, 12 and 3 pesticides, respectively, found in the gaseous phase



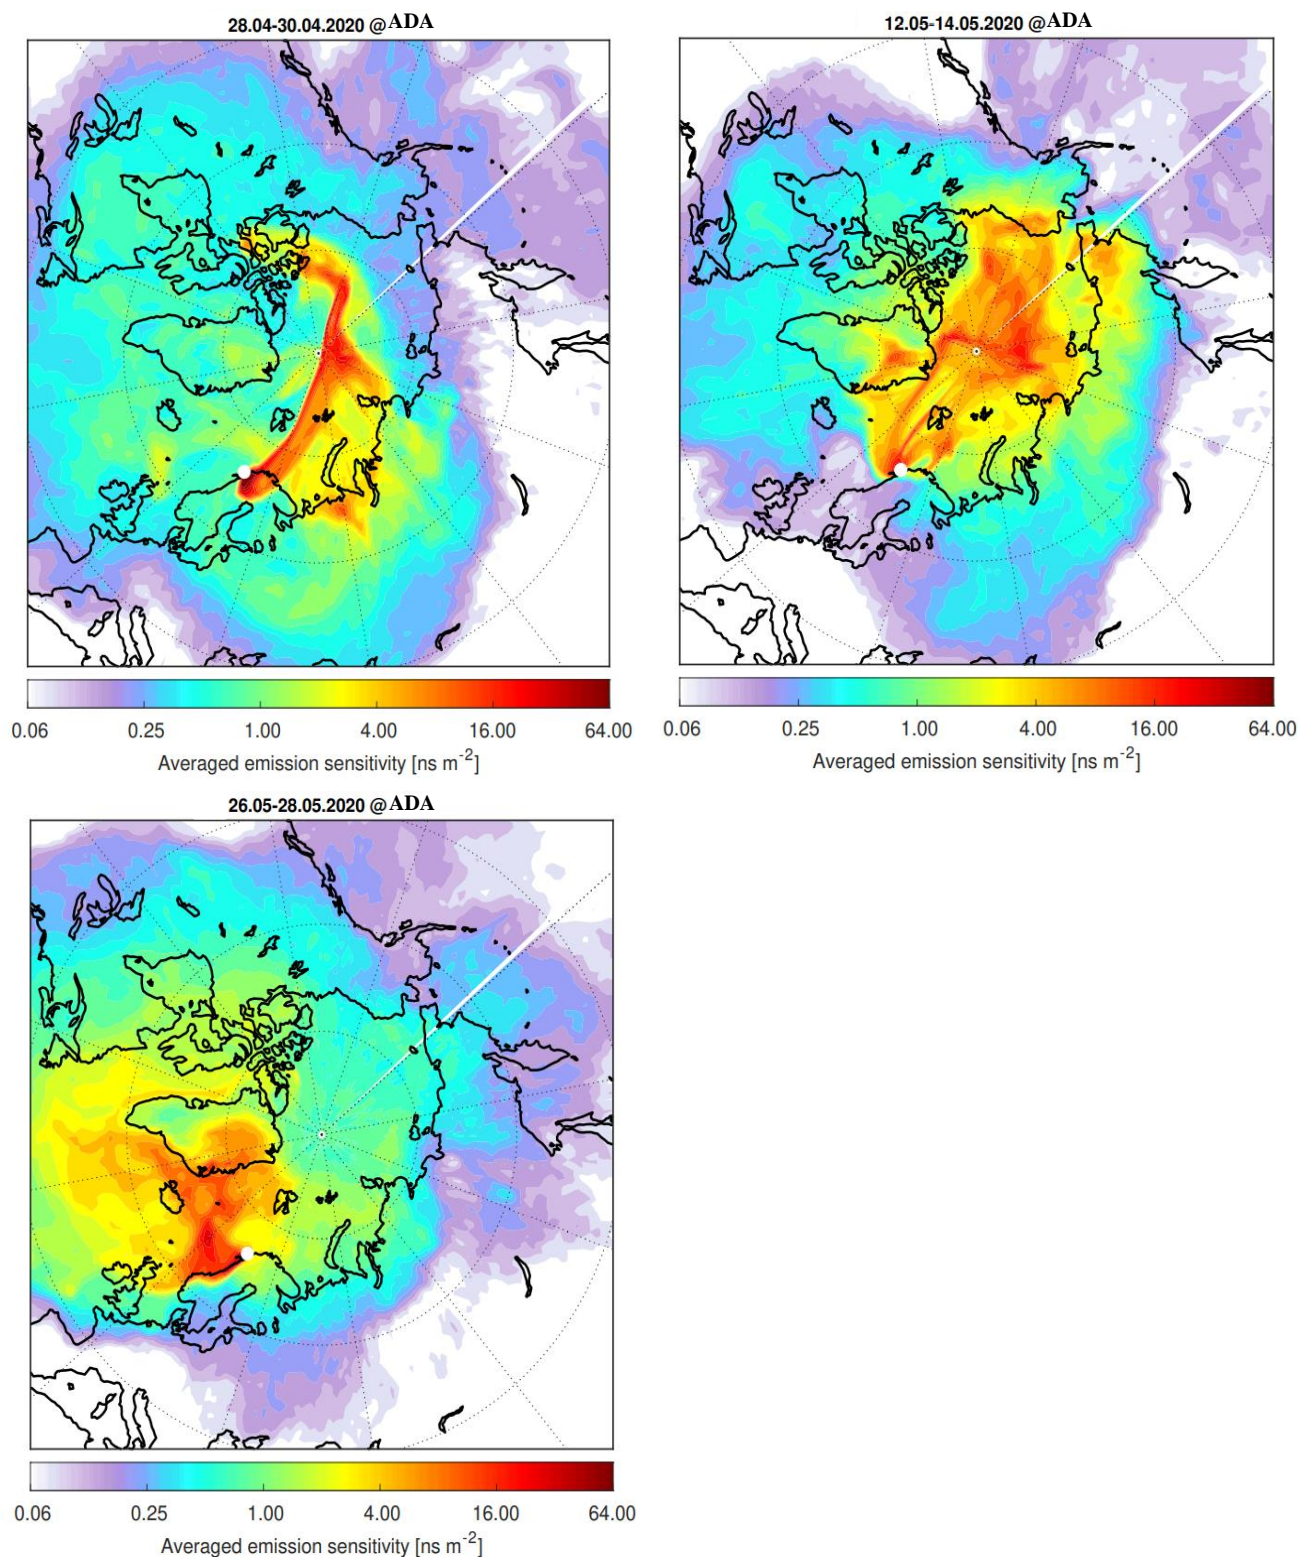

**Figure S3.** 30 days footprint sensitivities (FLEXPART model) for the first, second and third sample collected at Andøya (ADA) in which each one pesticide was found in the particulate phase, in addition to one, three and four pesticides, respectively, found in the gaseous phase

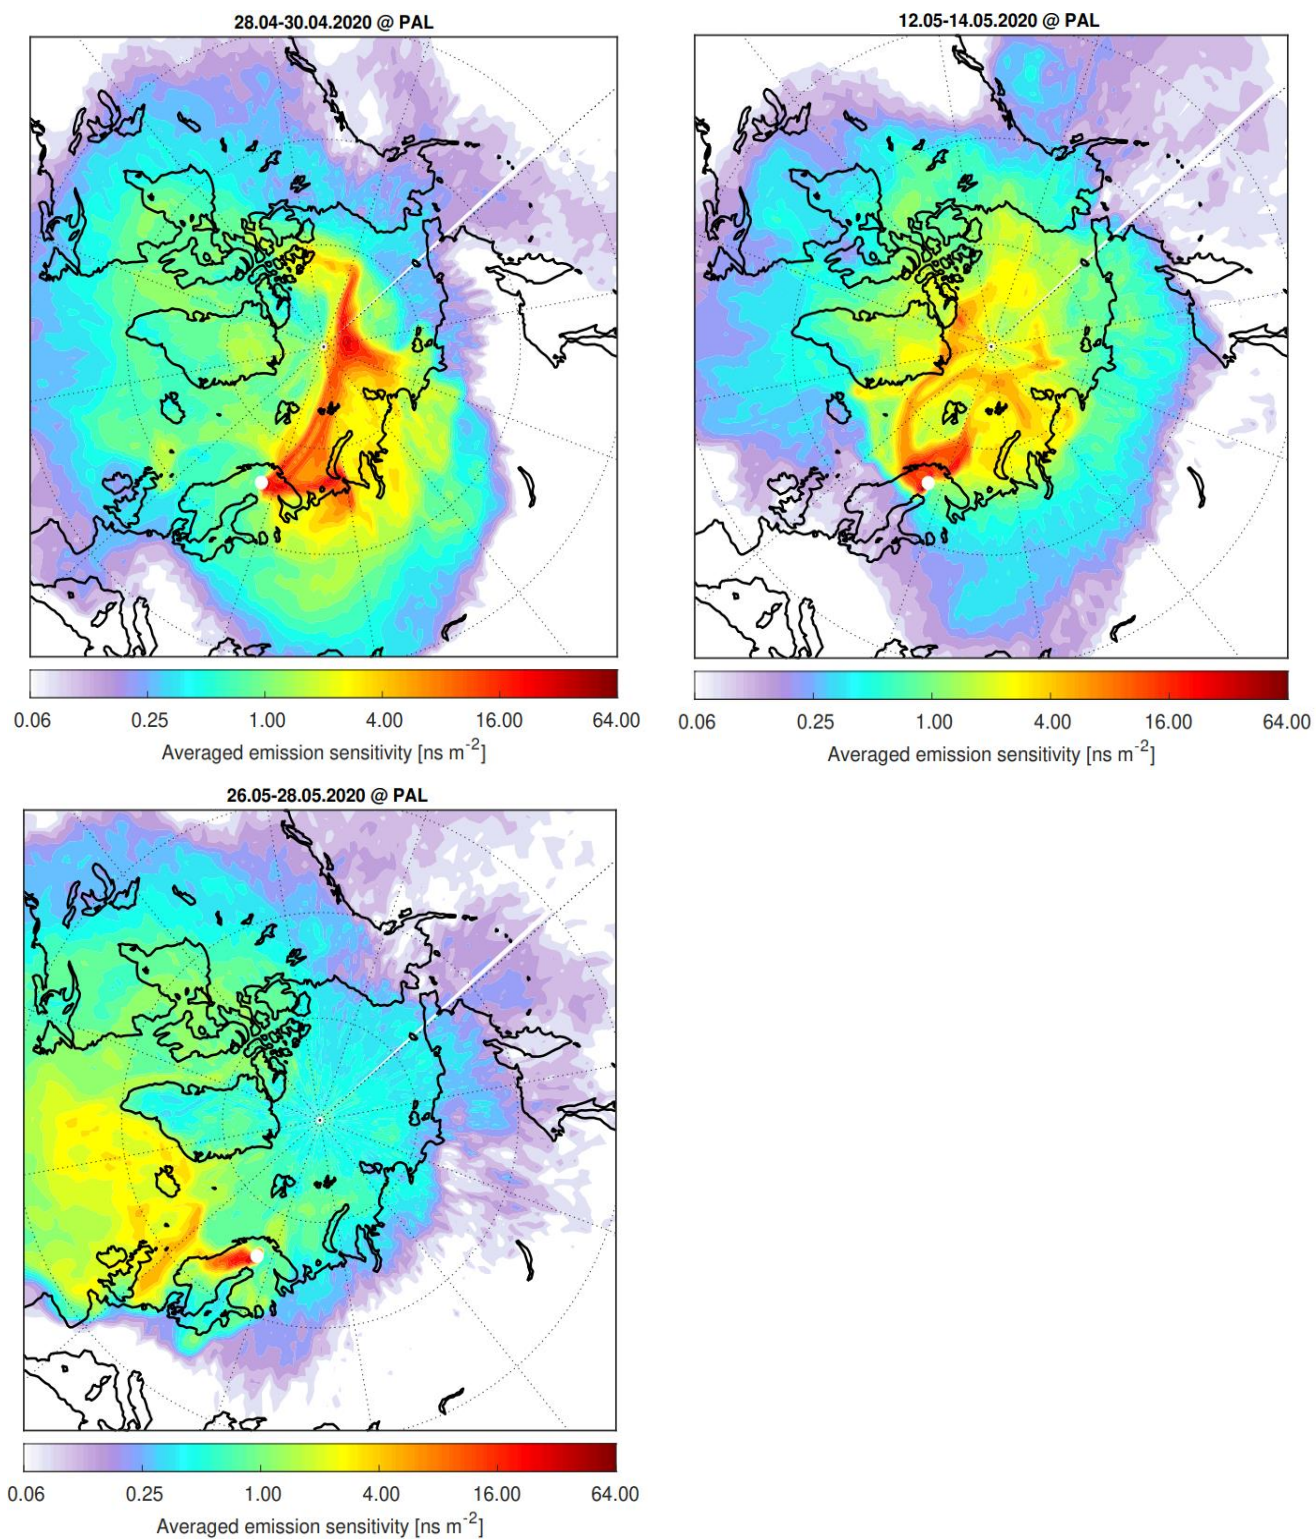

**Figure S4.** 30 days footprint sensitivities (FLEXPART model) for the first, second and third sample collected at Pallas Atmosphere-Ecosystem Supersite (PAL) in which one, zero and two pesticides were found in the particulate phase, respectively



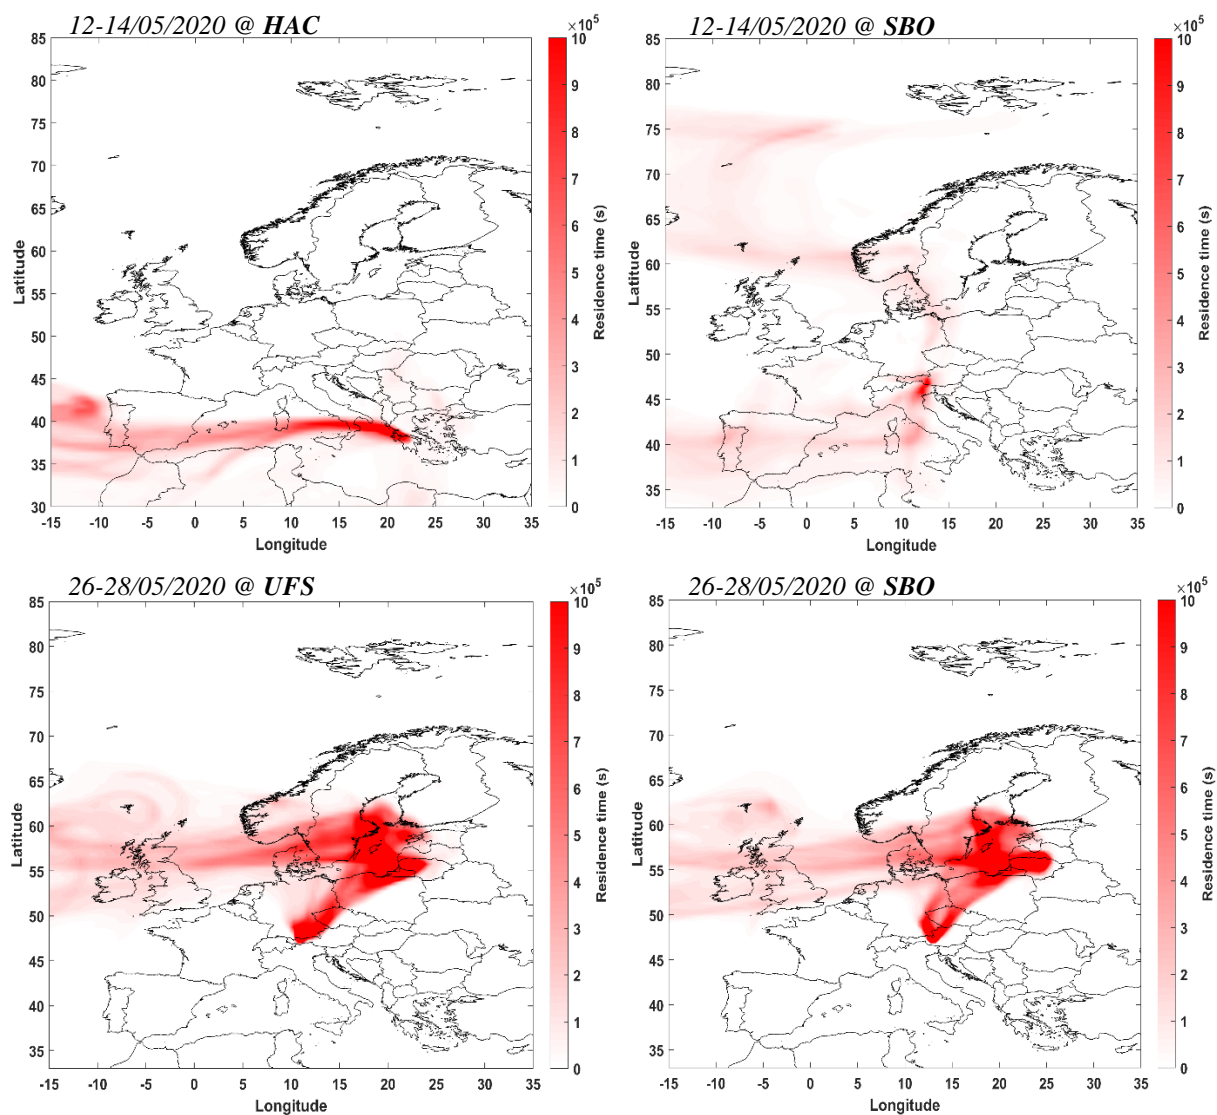

**Figure S5.** 10 days backward trajectories (FLEXPART model) of the samples that were within the free troposphere at the mountain sites

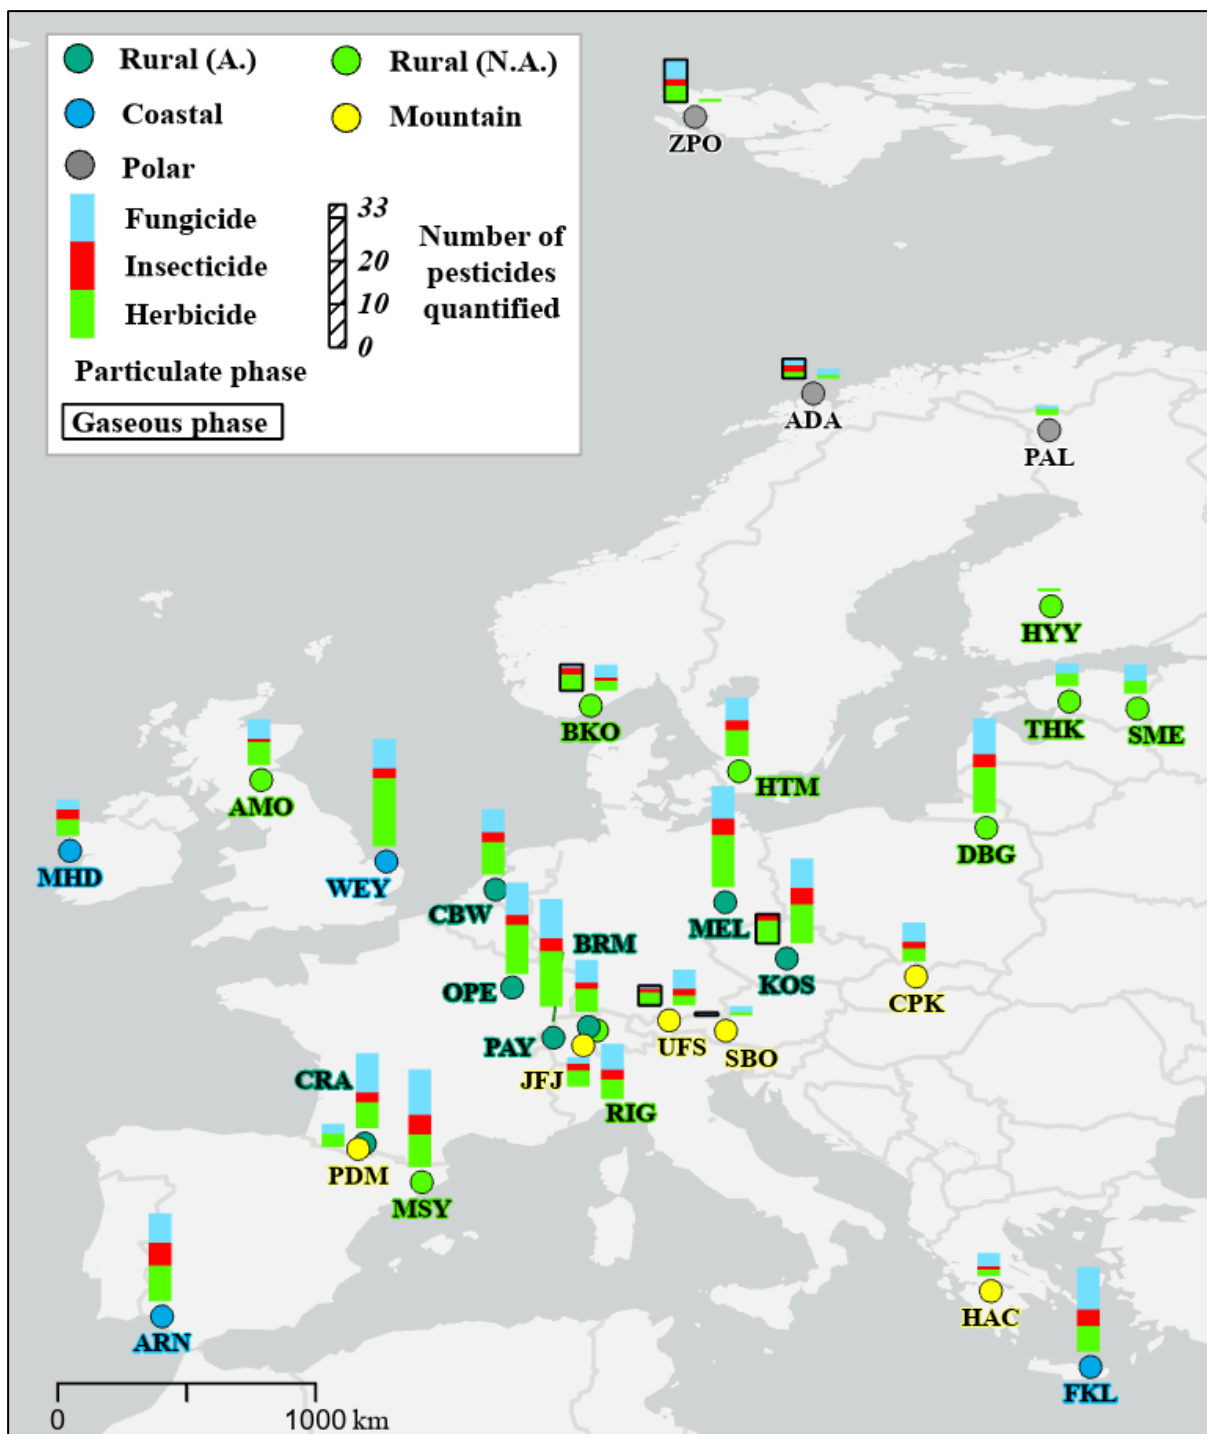

**Figure S6.** Number of pesticides quantified at each site in the particulate (all sites) and the gaseous phases (6 sites).



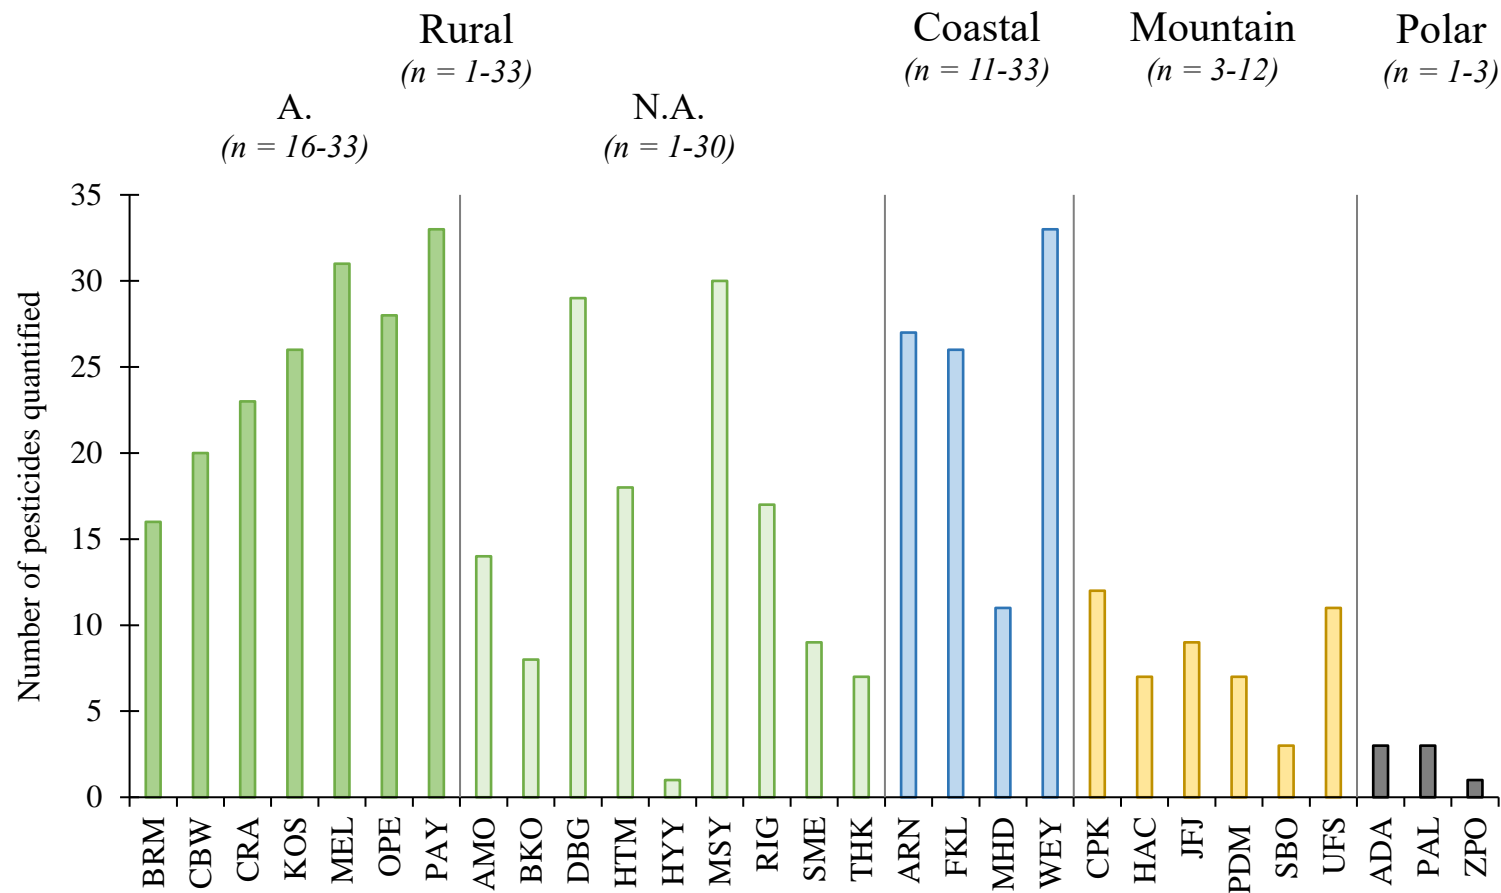

**Figure S7.** Number of pesticides quantified in the particulate phase at each site.

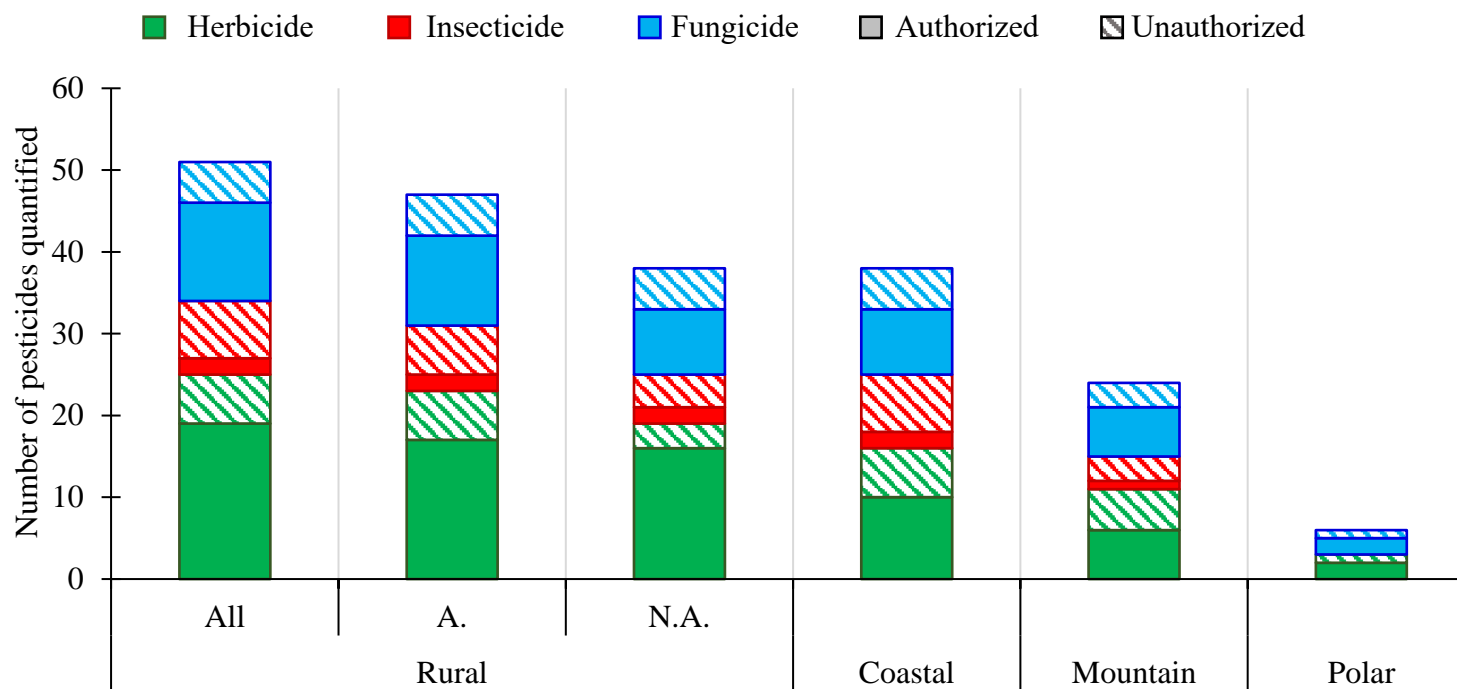

**Figure S8.** Number of pesticides quantified in the particulate phase at each site category. The pesticides are classified according to their types and regulatory status in the European Union.

The site categories used were rural (n=16) including agricultural adjacent sites (A., n=7) and non-agricultural adjacent sites (N.A., n=9), coastal (n=4), mountain (n=6) and polar sites (n=3).

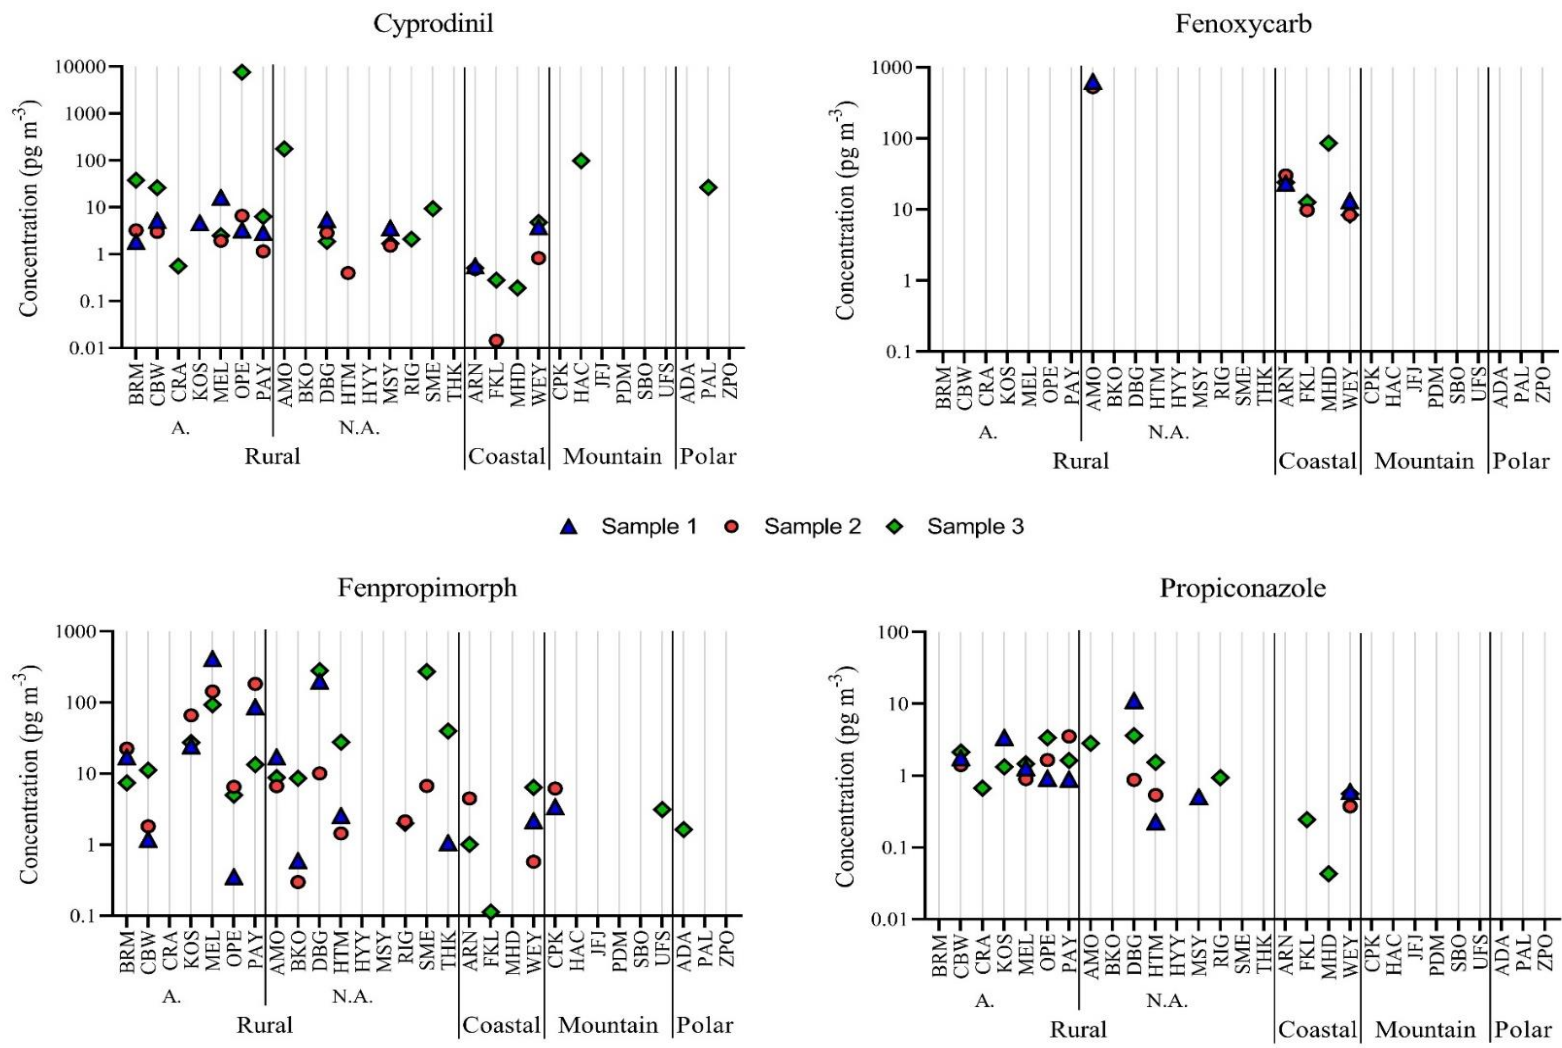

**Figure S9.** Concentrations in the particulate phase for the individual pesticides that showed a significant spatial variation between rural and coastal sites with the highest concentrations found at the rural sites

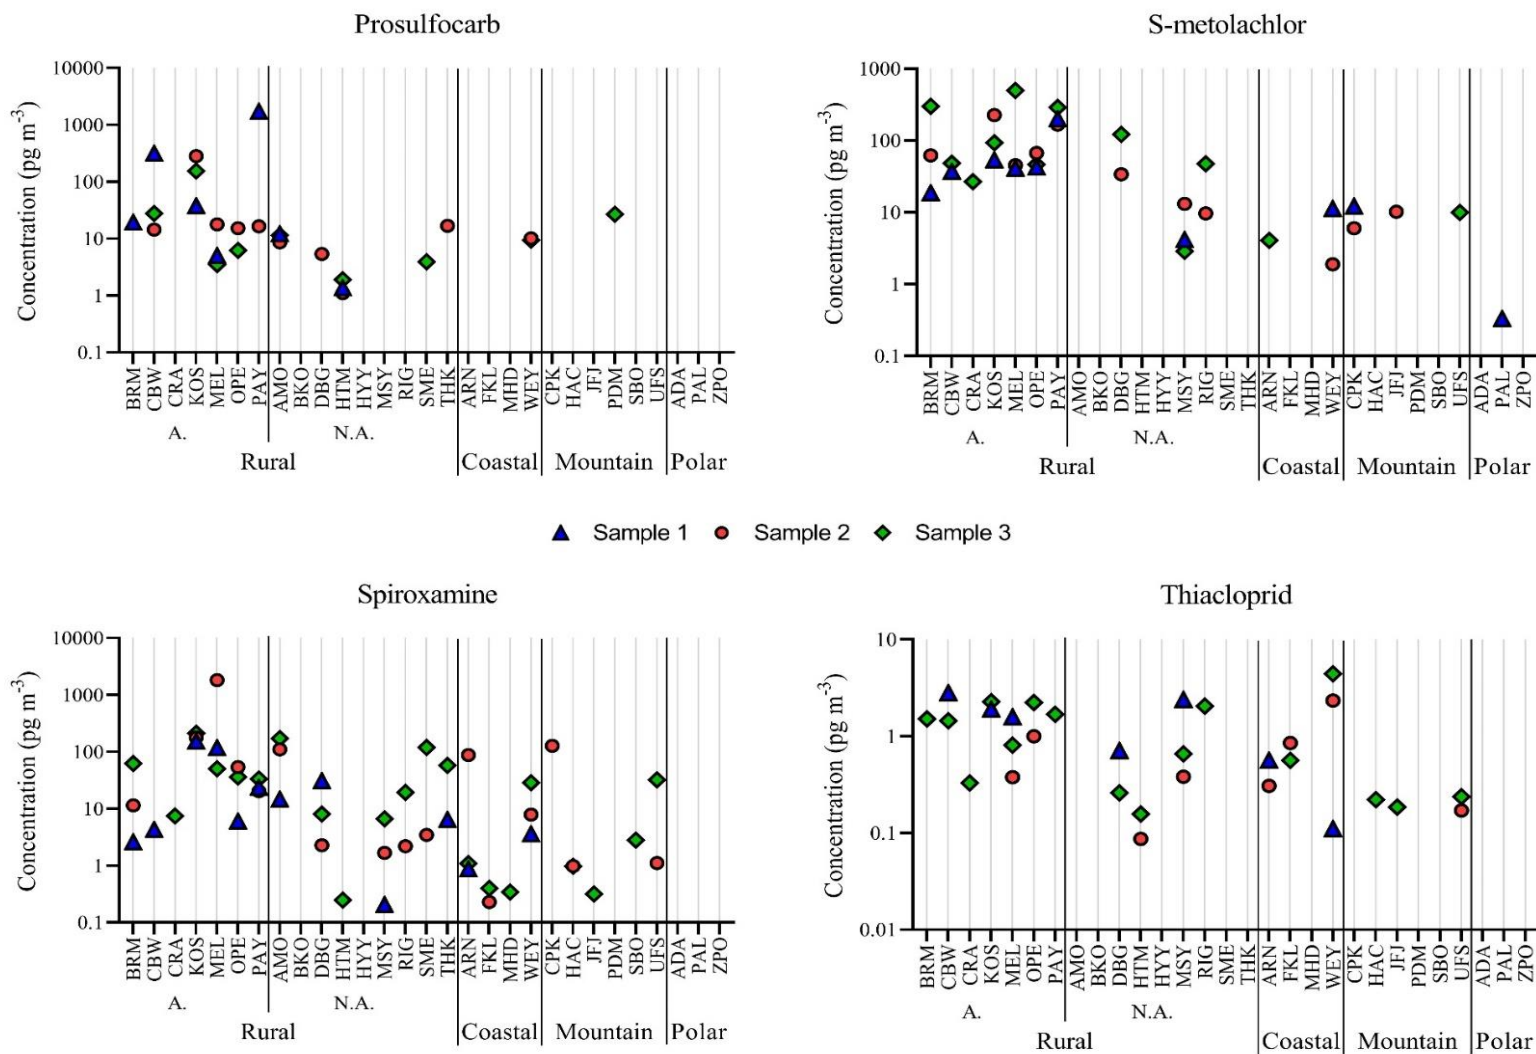

**Figure S9.** Concentrations in the particulate phase for the individual pesticides that showed a significant spatial variation between rural and coastal sites with the highest concentrations found at the rural sites (continued)

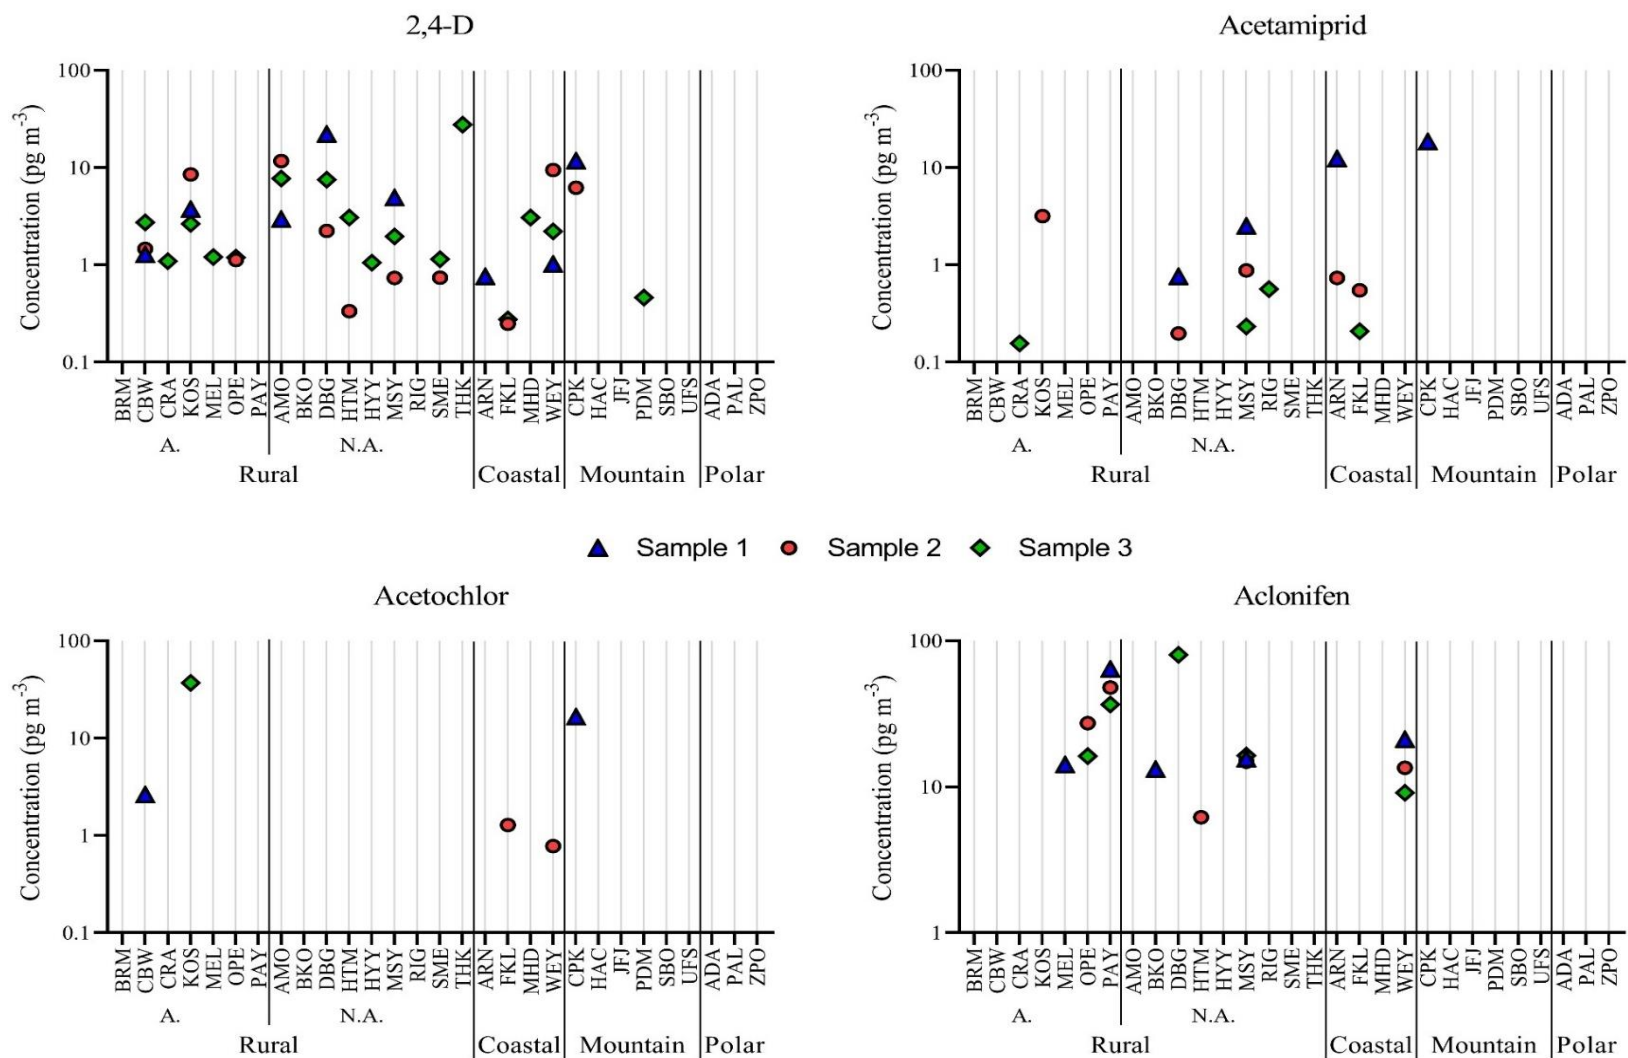

**Figure S10.** Concentrations in the particulate phase for those individual pesticides that do not show a significant spatial variation between the different site categories

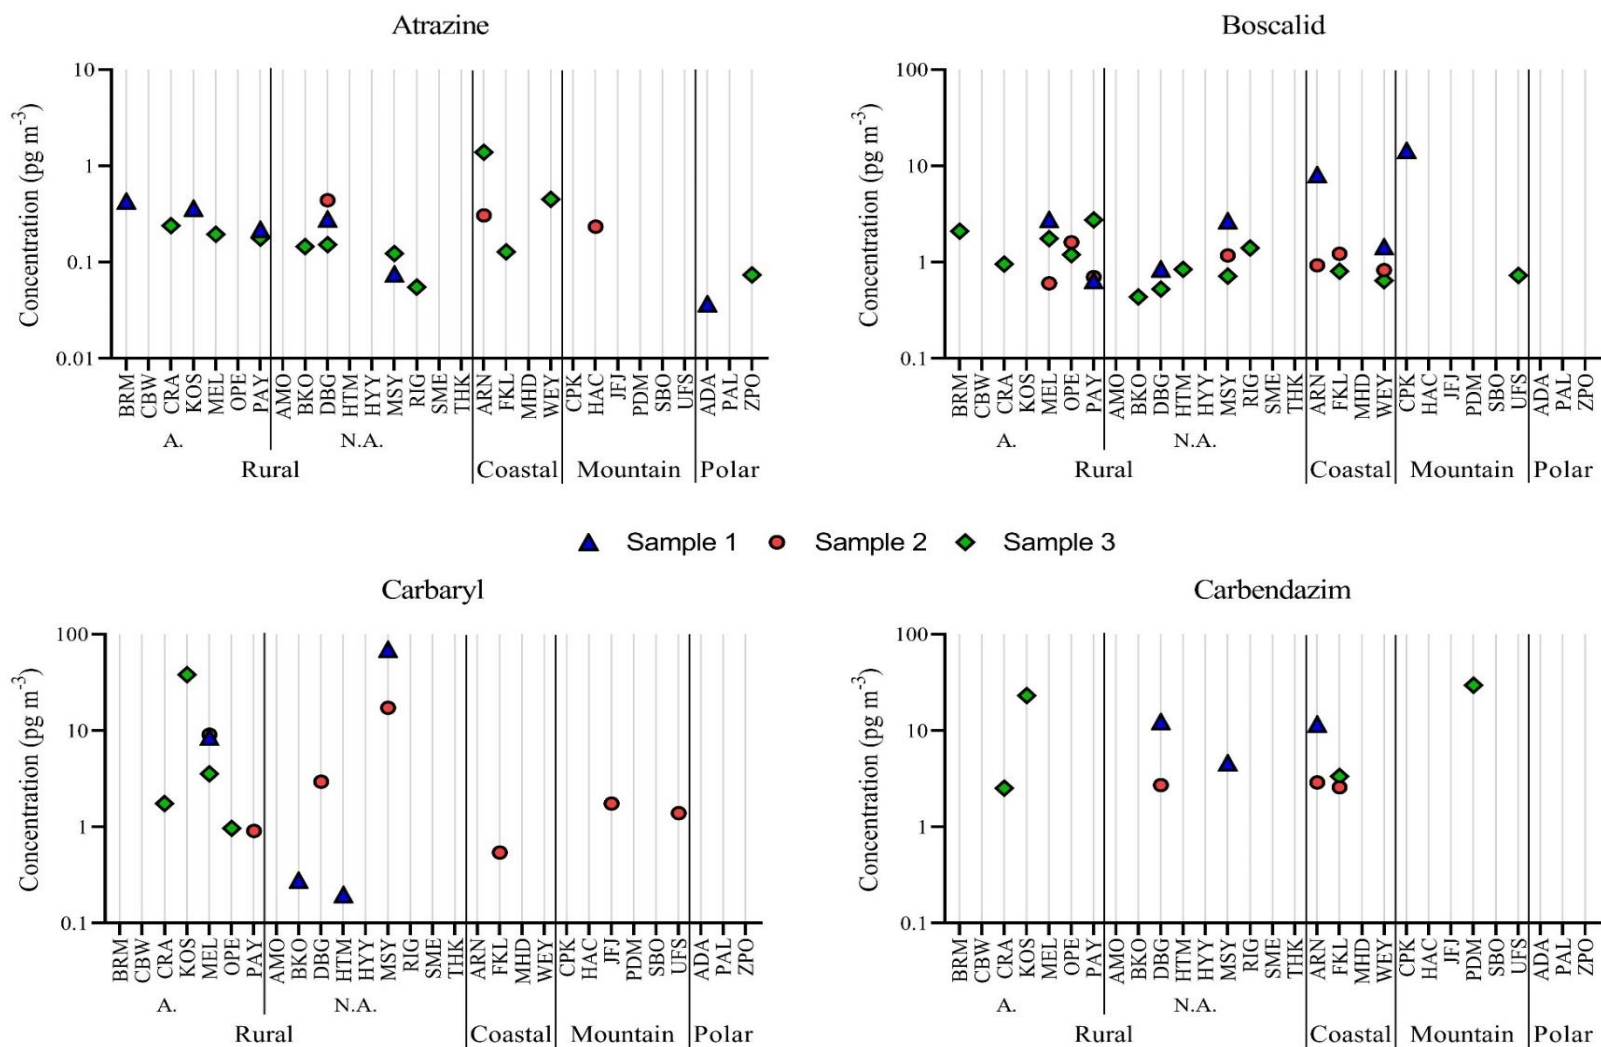

**Figure S10.** Concentrations in the particulate phase for those individual pesticides that do not show a significant spatial variation between the different site categories (continued)

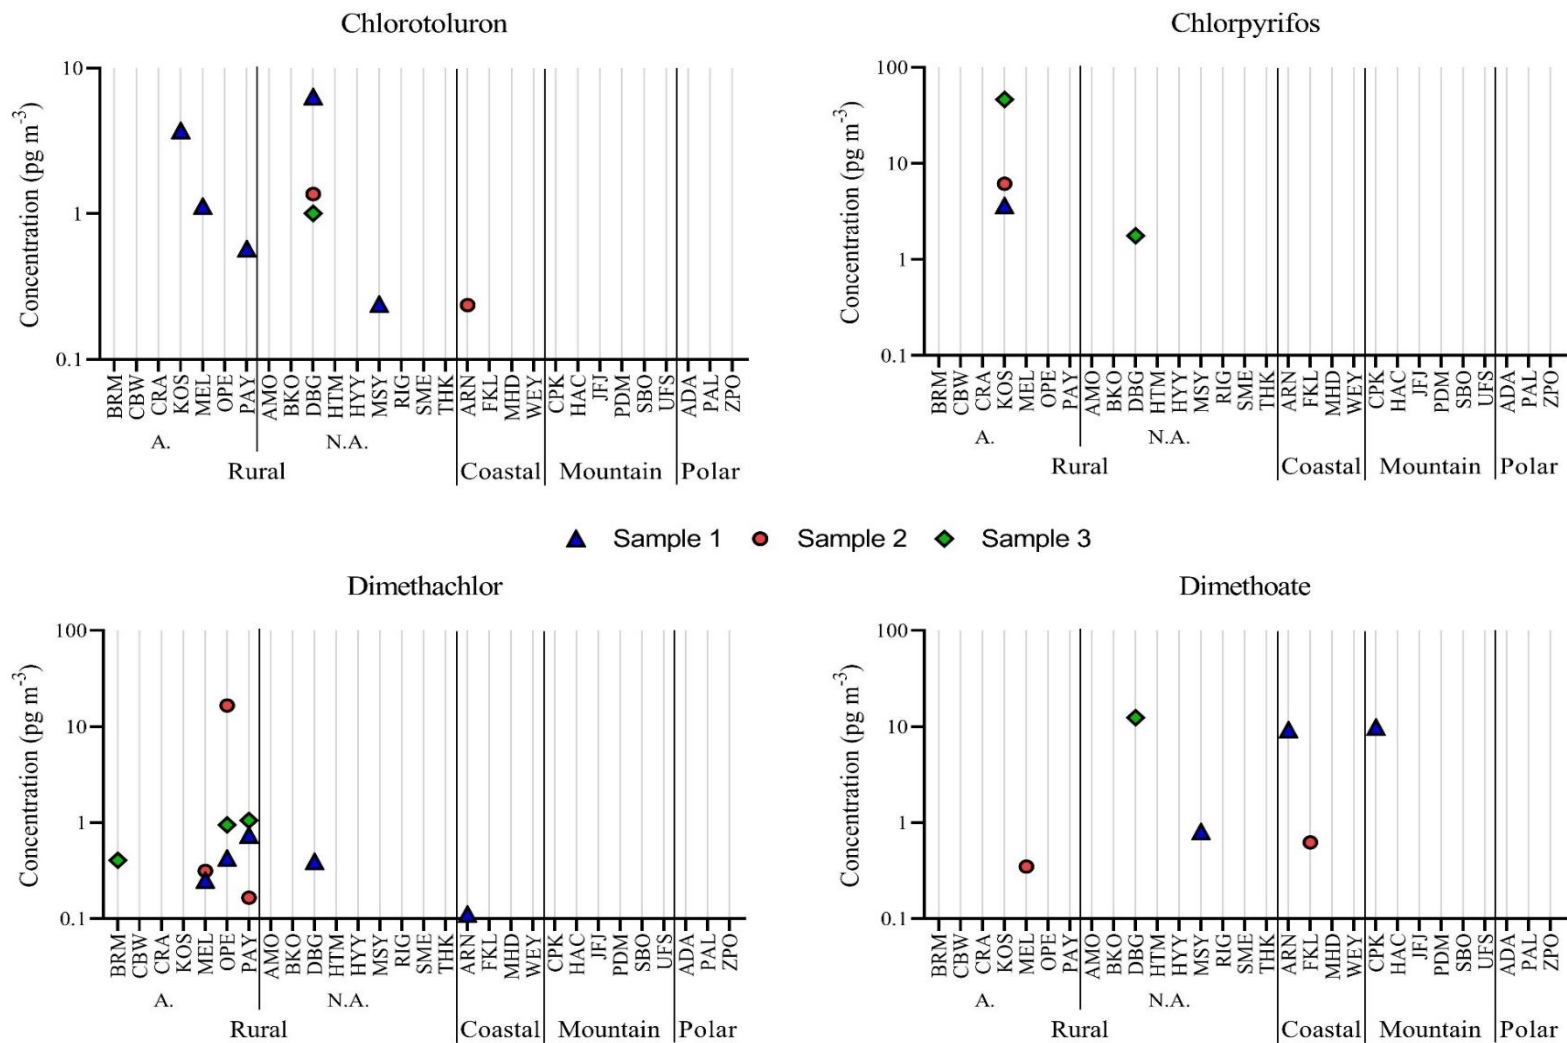

**Figure S10.** Concentrations in the particulate phase for those individual pesticides that do not show a significant spatial variation between the different site categories (continued)

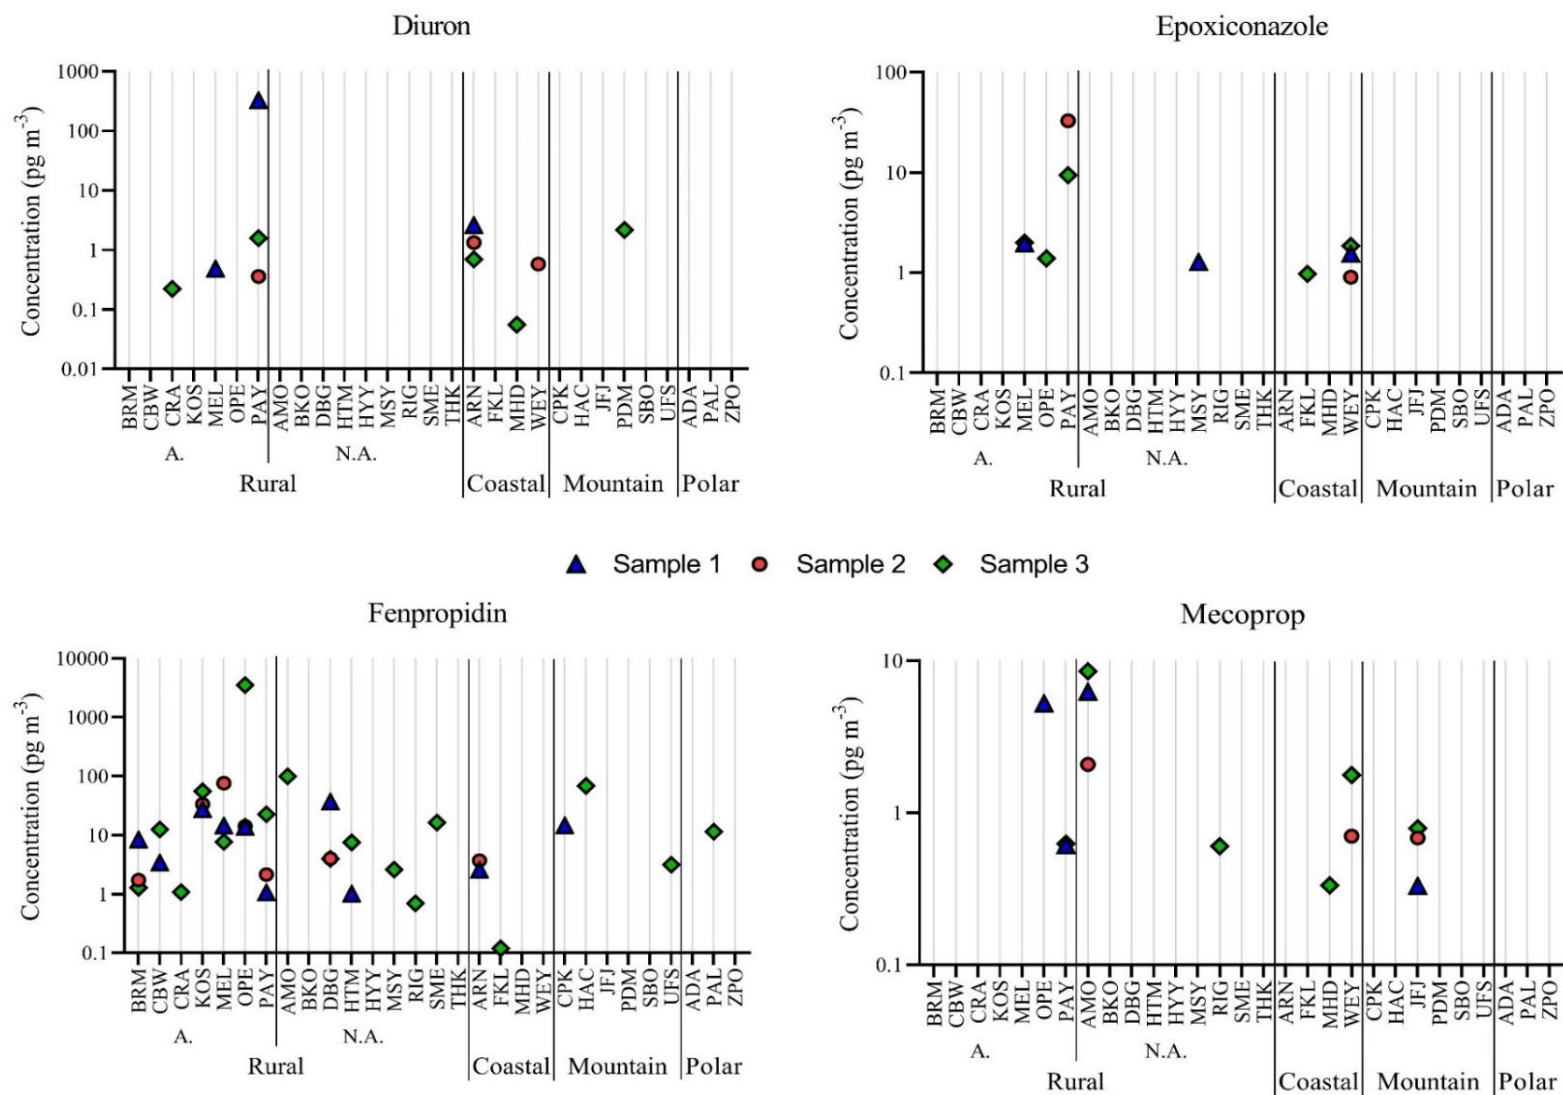

**Figure S10.** Concentrations in the particulate phase for those individual pesticides that do not show a significant spatial variation between the different site categories (continued)



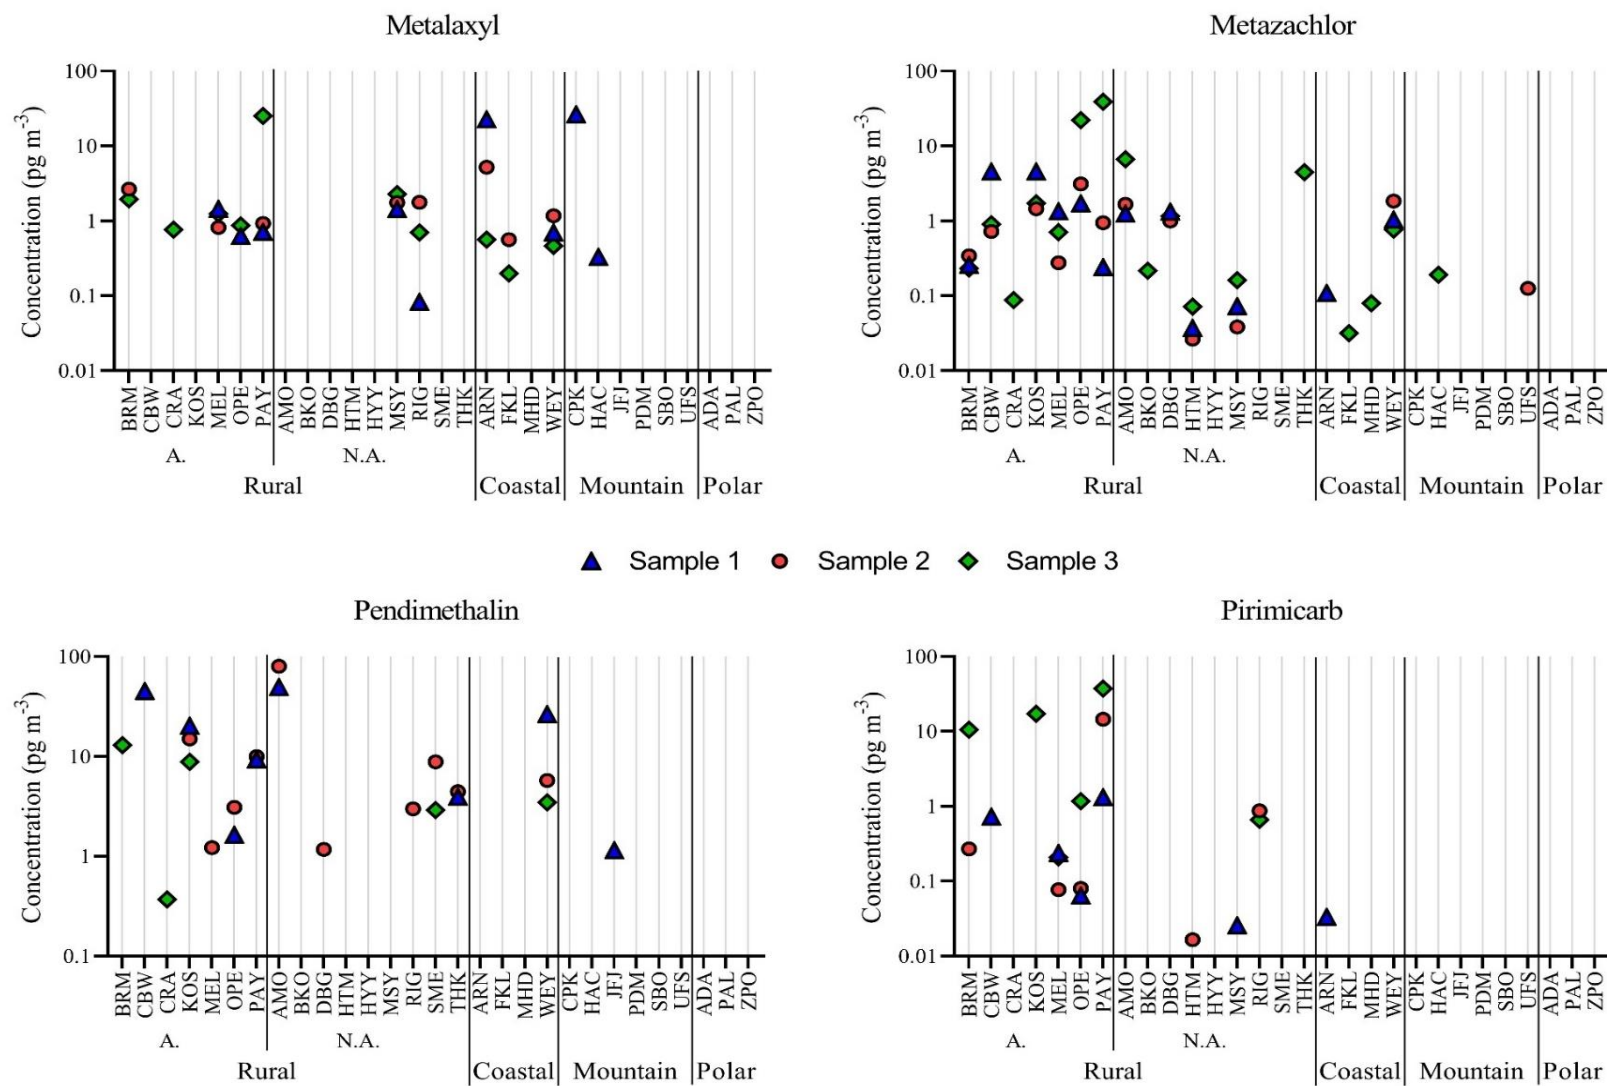

**Figure S10.** Concentrations in the particulate phase for those individual pesticides that do not show a significant spatial variation between the different site categories (continued)

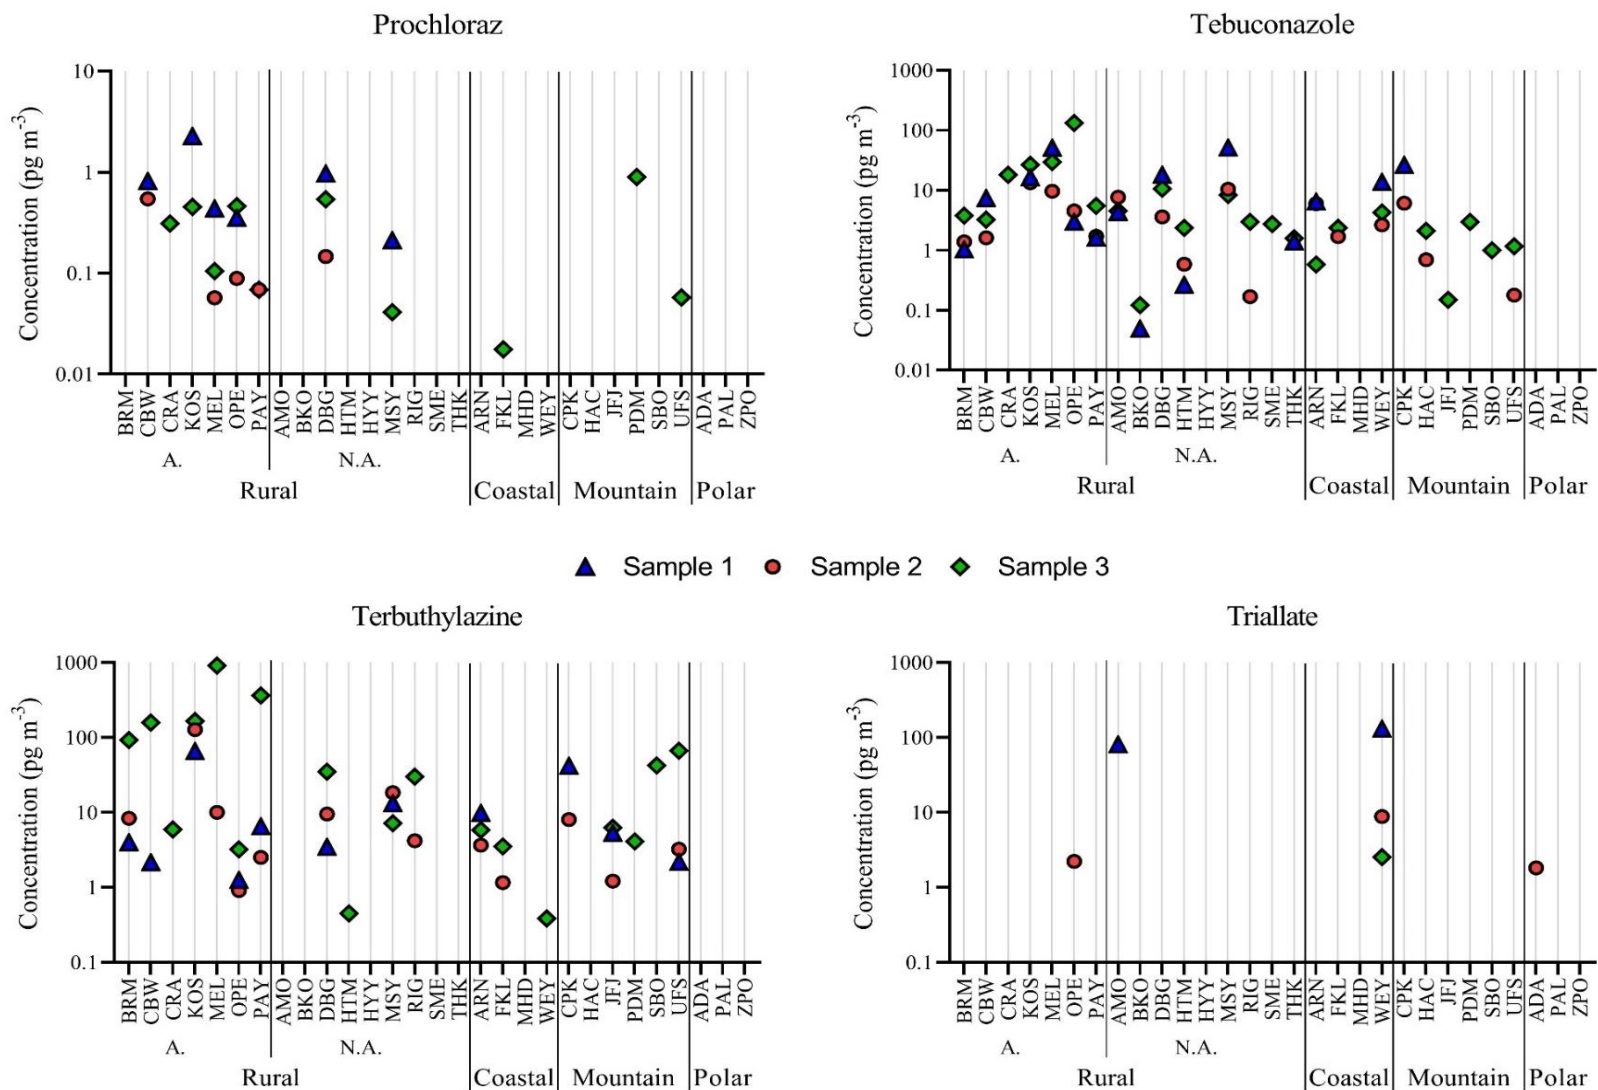

**Figure S10.** Concentrations in the particulate phase for those individual pesticides that do not show a significant spatial variation between the different site categories (continued)

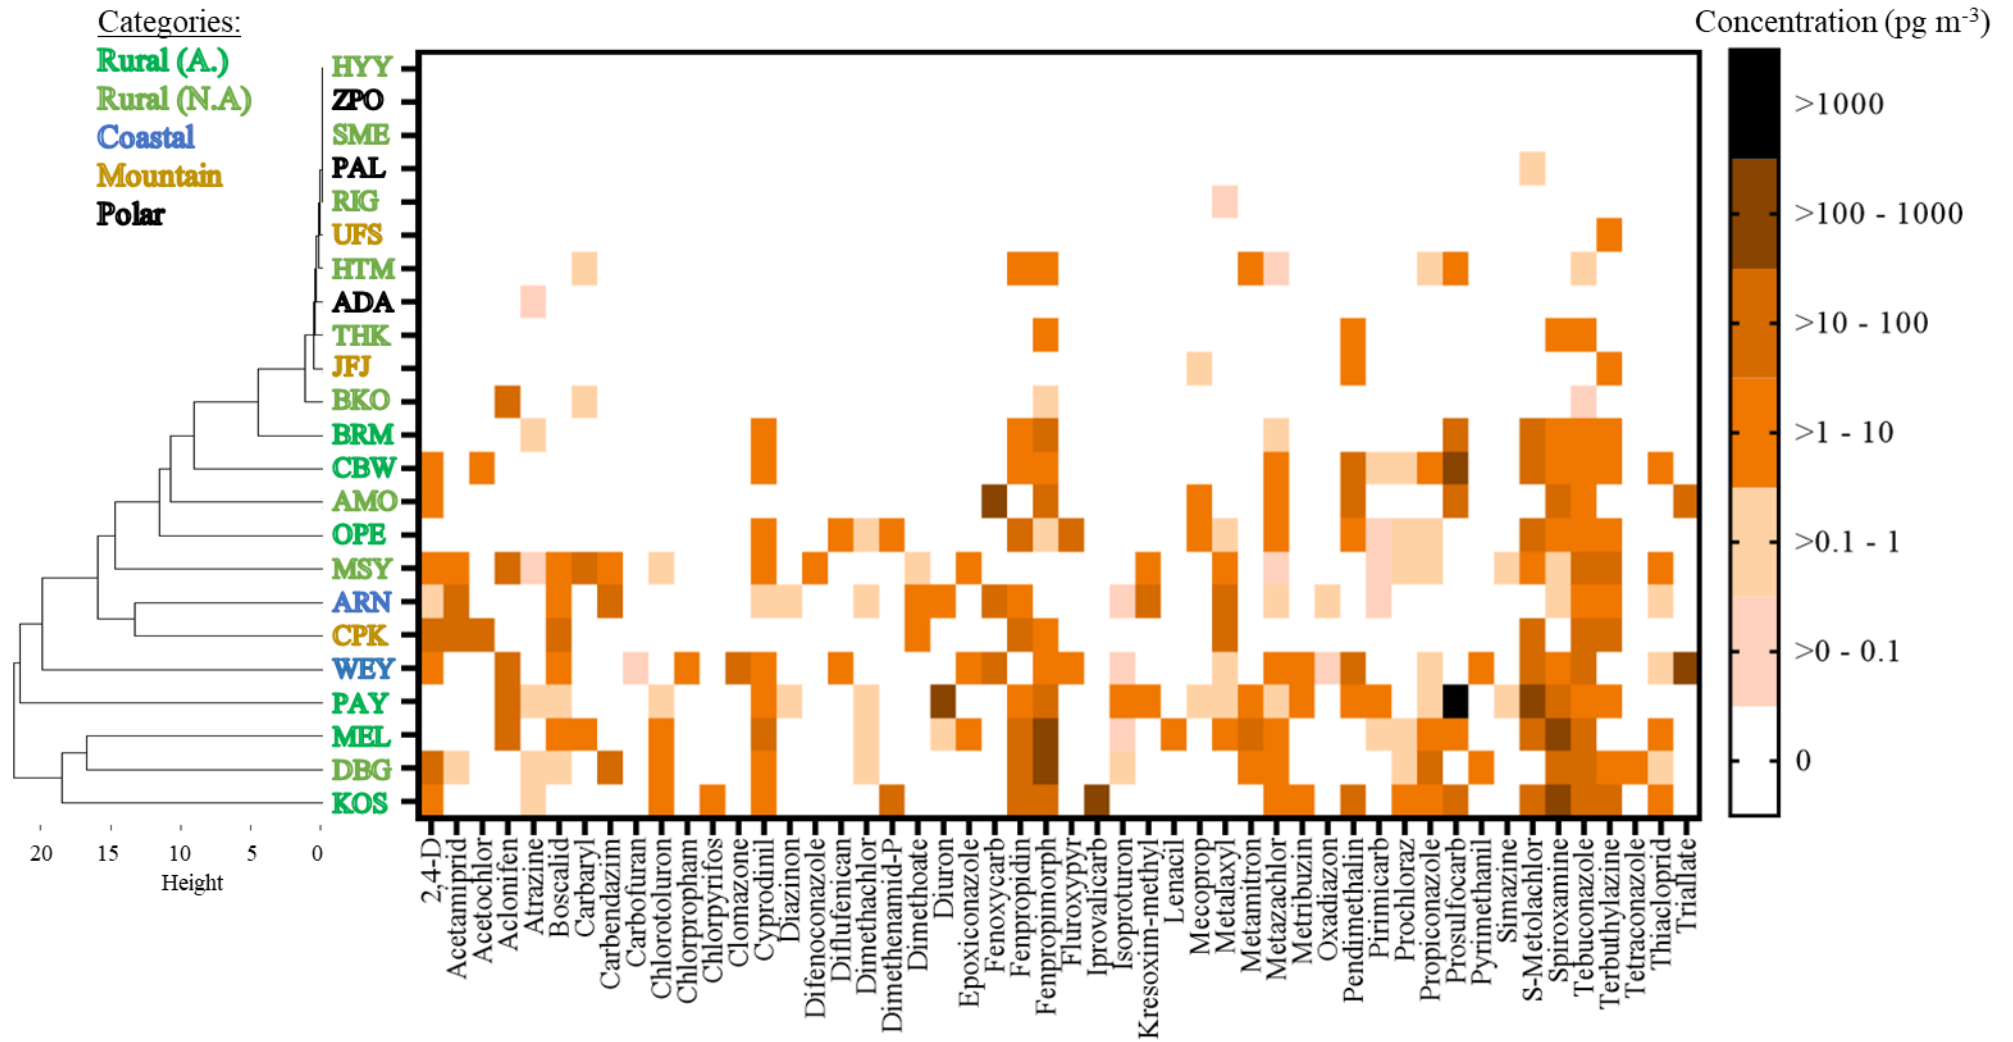

**Figure S11.** Hierarchical cluster analysis performed on the particulate phase concentrations of pesticides measured during the 1<sup>st</sup> sampling period

(28-30.04.2020)

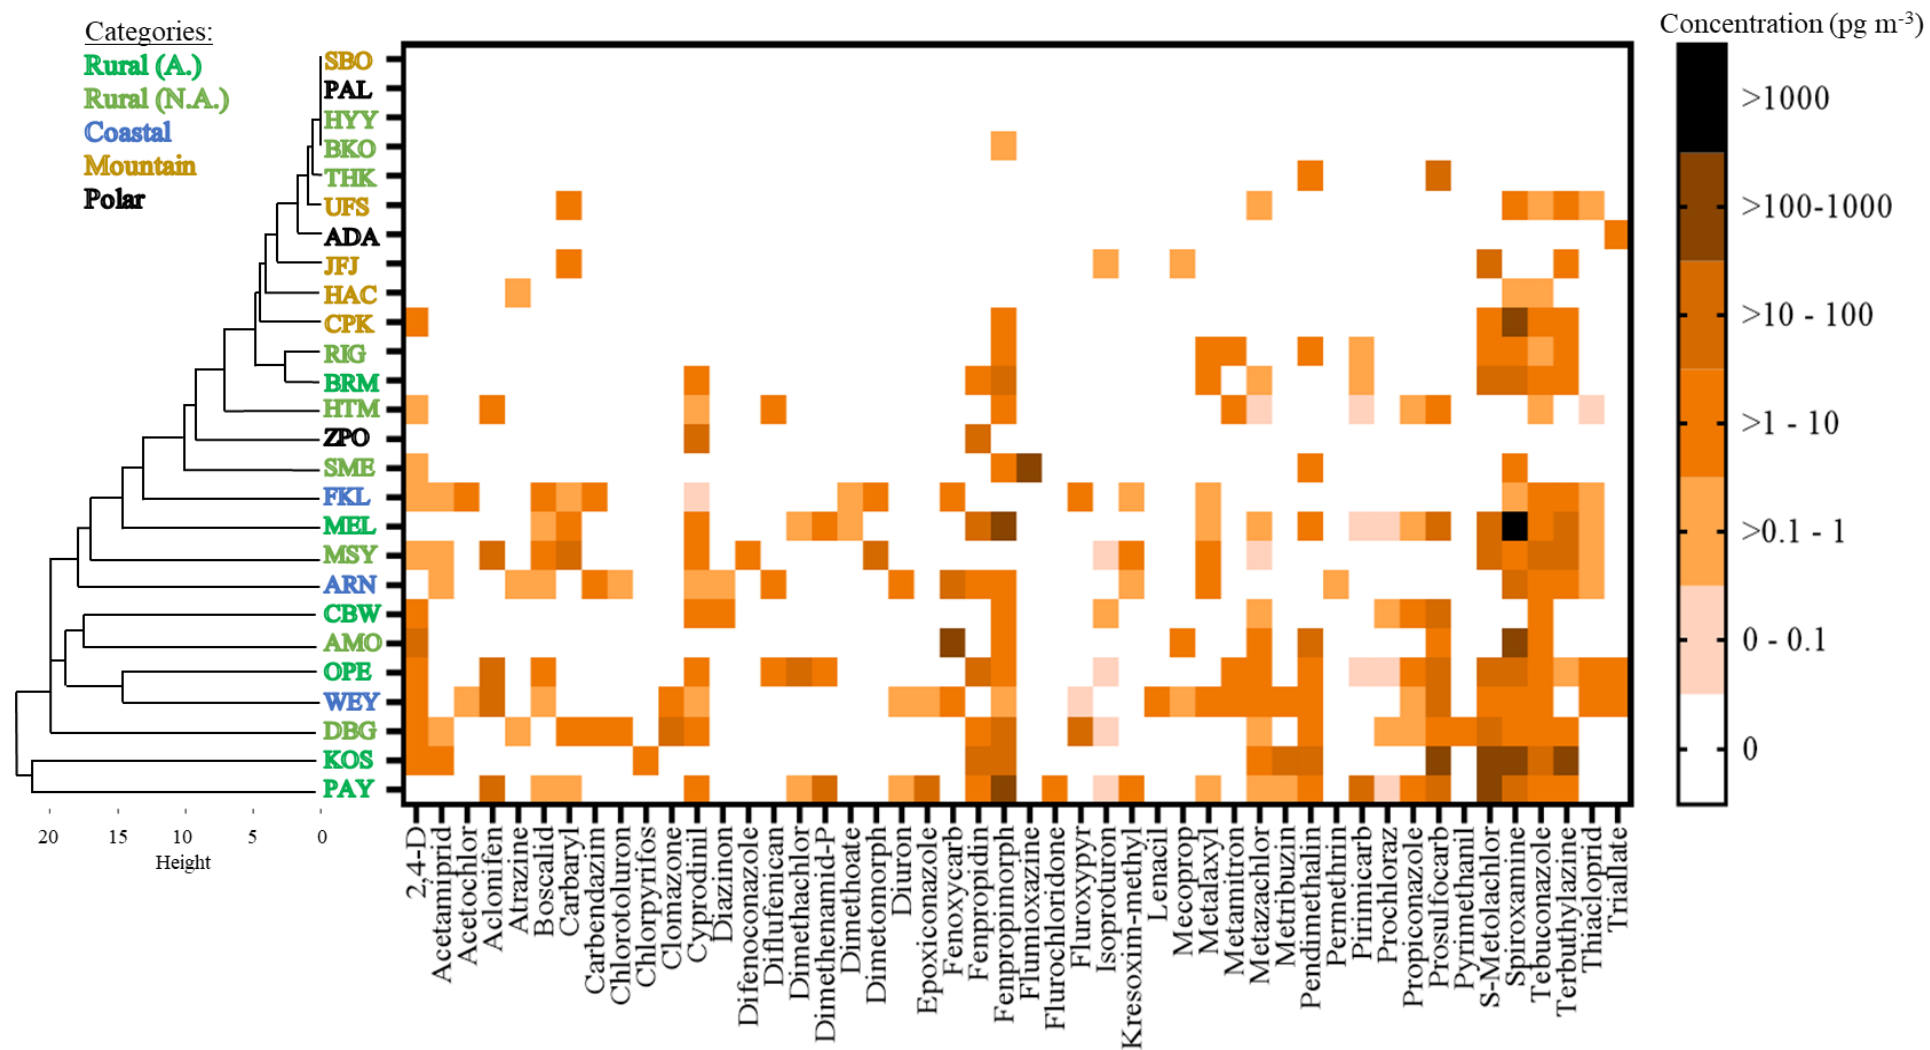

**Figure S12.** Hierarchical cluster analysis performed on the particulate phase concentrations of pesticides measured during the 2<sup>nd</sup> sampling period (12-14.05.2020)

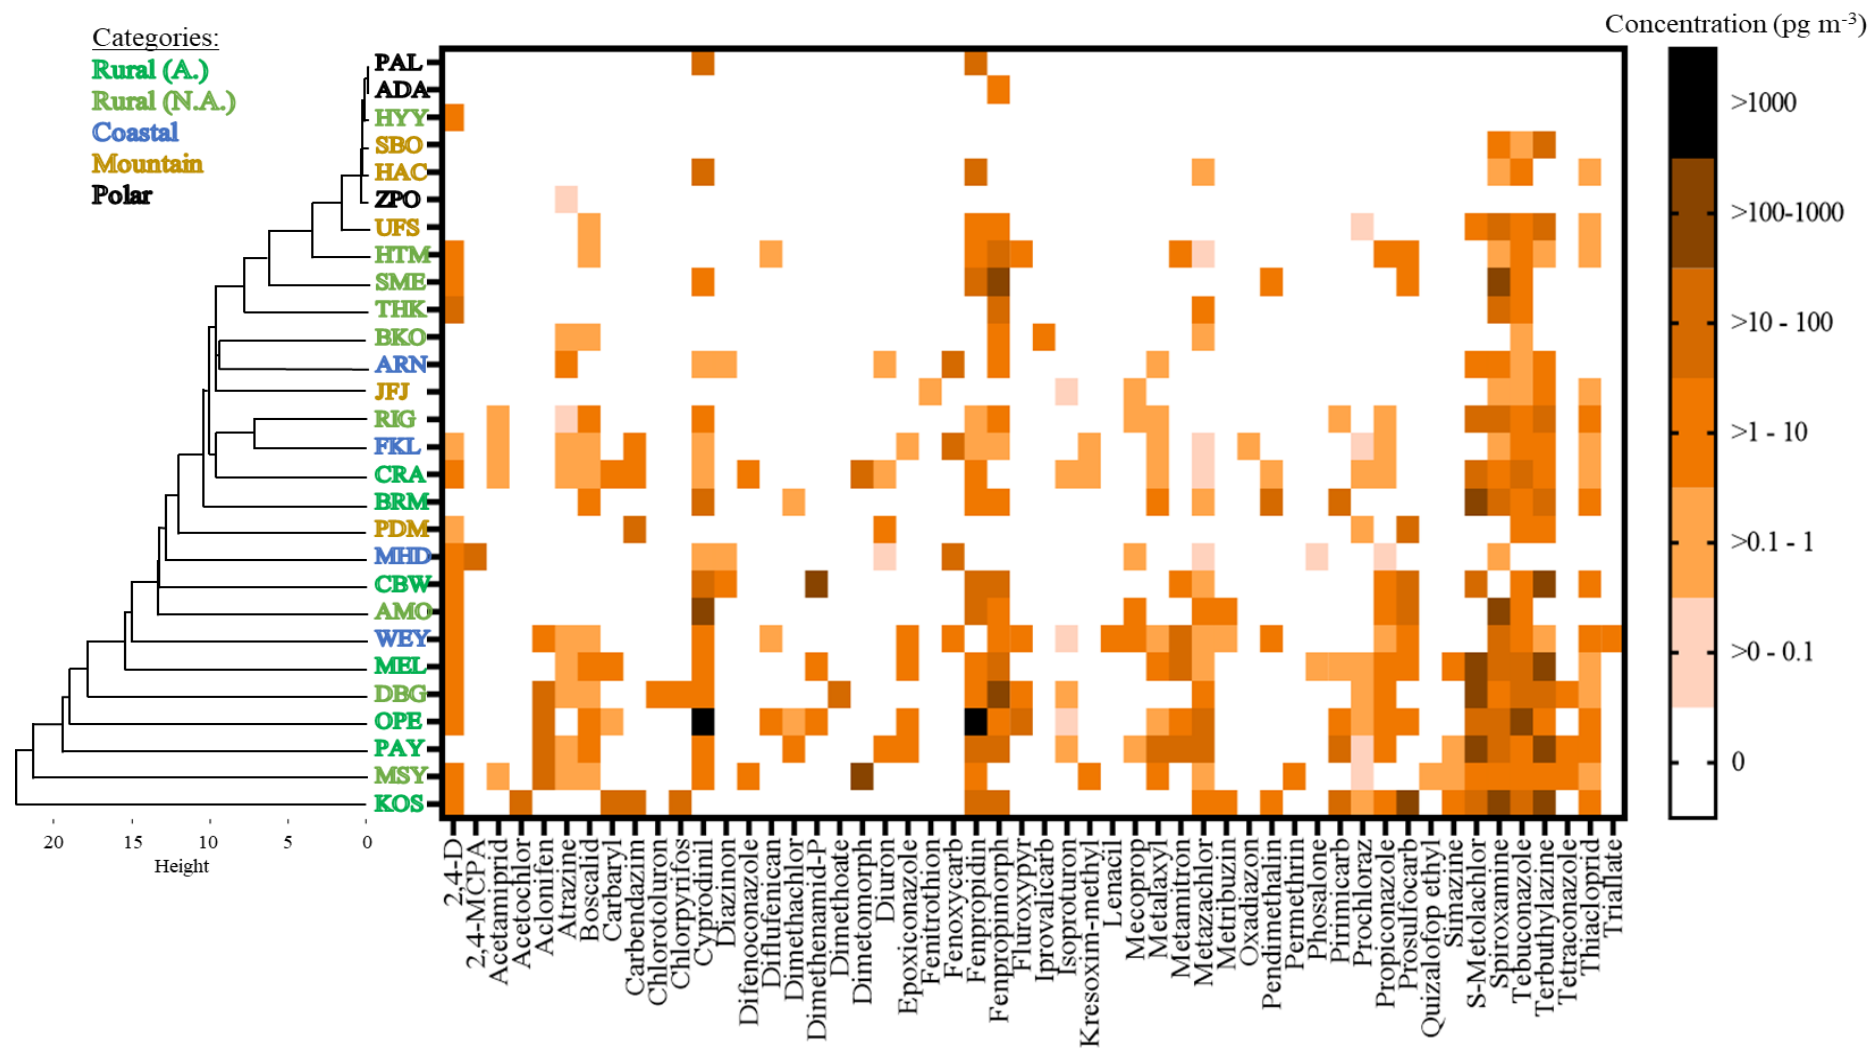

Figure S13. Hierarchical cluster analysis performed on the particulate phase concentrations of pesticides measured during the 3<sup>rd</sup> sampling period (26-28.05.2020)

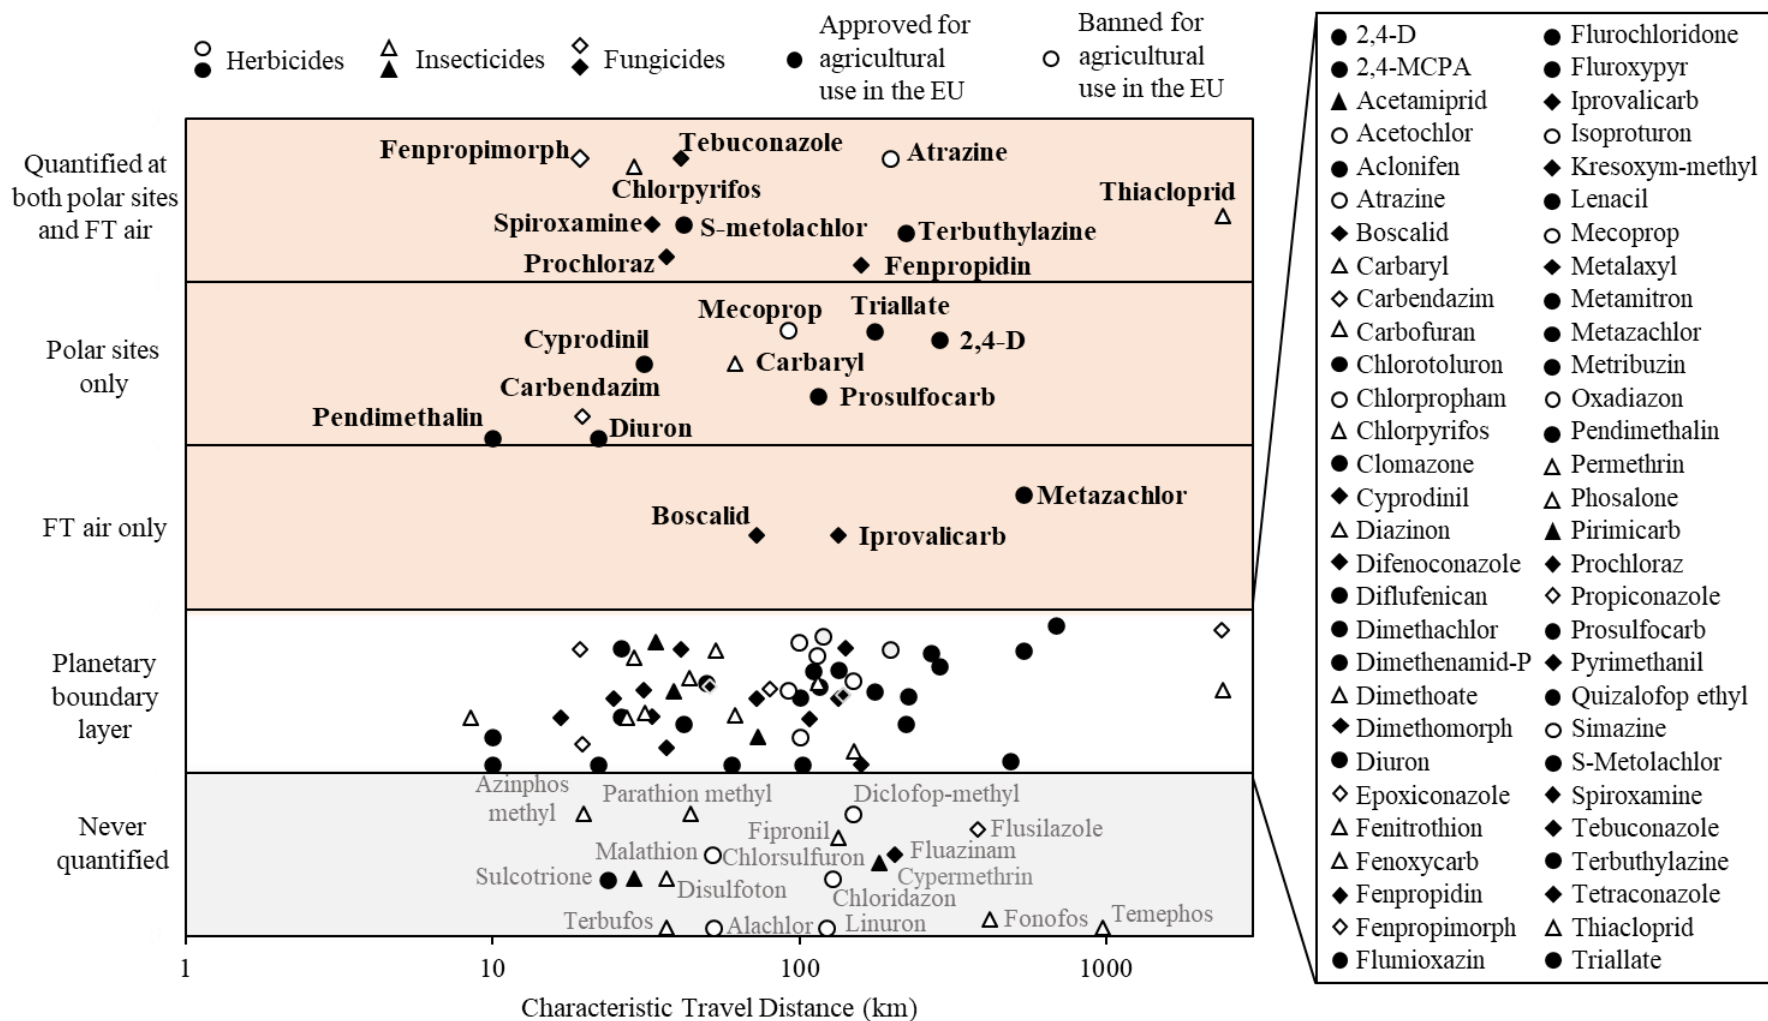

**Figure S14.** Pesticides identified as prone to long-range atmospheric transport (orange area, FT = free tropospheric), pesticides quantified in the planetary boundary layer (white area), and pesticides never observed (grey area) ordered along model estimate of characteristic travel distance.

Not pictured is one pesticide never observed i.e., esbiothrin, due to unavailability of some input parameters.

**Table S1.** Sampling methodology at the (A) rural, (B) coastal, (C) mountain and (D) polar sites. Site codes in bold where gas phase samples were also collected.

(A)

| Site code  | Sampling site                                                              | Rural subcategories | Sampler type | Sampler used                                                         | Inlet particle size fraction | Flow-rate (m <sup>3</sup> h <sup>-1</sup> ) | Sampled volume (m <sup>3</sup> ) Average [Min-Max] | Filter QFF | Number of samples collected |
|------------|----------------------------------------------------------------------------|---------------------|--------------|----------------------------------------------------------------------|------------------------------|---------------------------------------------|----------------------------------------------------|------------|-----------------------------|
| AMO        | Auchencorth Moss                                                           | NA                  | LVAS         | PARTISOL 2025 (Thermo Fisher Scientific, Waltham, USA)               | PM <sub>10</sub>             | 1                                           | 48                                                 | b          | 3                           |
| <b>BKO</b> | <b>Birkenes Observatory</b>                                                | NA                  | HVAS         | Digitel DHA-77 (Digitel, Volketswil, CH)                             | PM <sub>10</sub>             | 30                                          | 1633<br>[1625 - 1642]                              | a          | 3                           |
| BRM        | Beromünster                                                                | A                   | HVAS         | Digitel DHA-80 (Digitel, Volketswil, CH)                             | PM <sub>10</sub>             | 30                                          | 761<br>[743 - 797]                                 | c          | 3                           |
| CBW        | Cabauw – Wielsekade                                                        | A                   | LVAS         | LVS 3.1 (Combde-Derenda, Stahnsdorf, DE)                             | PM <sub>10</sub>             | 2.3                                         | 110                                                | b          | 3                           |
| CRA        | Centre de Recherches Atmosphériques                                        | A                   | HVAS         | Algade EAS100K (Algade, Bessines-sur-Gartempe, FR)                   | PM <sub>10</sub>             | 80                                          | 3847                                               | a          | 1                           |
| DBG        | Integrated Monitoring Station Puszcza Borecka, Diabla Gora                 | NA                  | HVAS         | Digitel DHA-80 (Digitel, Volketswil, CH)                             | PM <sub>10</sub>             | 30                                          | 1587<br>[1572 - 1607]                              | a          | 3                           |
| HTM        | Hyltemossa                                                                 | NA                  | HVAS         | Dekati (Dekati, Kangasala, FI)                                       | TSP                          | 60                                          | 2880                                               | a          | 3                           |
| HYY        | Station for Measuring Ecosystem - Atmosphere Relations (SMEARII), Hyttiälä | NA                  | LVAS         | Dekati PM10 (Dekati, Kangasala, FI)                                  | PM <sub>10</sub>             | 1.4                                         | 66<br>[65 - 67]                                    | b          | 3                           |
| <b>KOS</b> | <b>National Atmospheric Observatory Košetice</b>                           | A                   | LVAS         | Leckel (Leckel, Berlin, Germany) / Tisch Environmental, Cleves, USA) | PM <sub>10</sub>             | 2.3                                         | 110                                                | a          | 3                           |
| MEL        | TROPOS research station Melpitz                                            | A                   | HVAS         | Digitel DHA-80 (Digitel, Volketswil, CH)                             | PM <sub>10</sub>             | 30                                          | 1435<br>[1403 - 1469]                              | a          | 3                           |
| MSY        | Montseny                                                                   | NA                  | HVAS         | Digitel DH-80 (Digitel, Volketswil, Switzerland)                     | PM <sub>10</sub>             | 30                                          | 1465<br>[1459 - 1469]                              | a          | 3                           |
| OPE        | Observatoire Pérenne de l'Environnement                                    | A                   | HVAS         | Digitel DA-80 (Digitel, Volketswil, CH)                              | PM <sub>10</sub>             | 30                                          | 1352<br>[1345 - 1364]                              | a          | 3                           |
| PAY        | Payerne                                                                    | NA                  | HVAS         | Digitel DHA-80 (Digitel, Volketswil, CH)                             | PM <sub>10</sub>             | 30                                          | 1459<br>[1452 - 1463]                              | c          | 3                           |
| RIG        | Rigi                                                                       | NA                  | HVAS         | Digitel DHA-80 (Digitel, Volketswil, CH)                             | PM <sub>10</sub>             | 30                                          | 1451<br>[1445 - 1455]                              | c          | 3                           |
| SME        | SMEAR Estonia                                                              | NA                  | LVAS         | Custom made                                                          | TSP                          | 1.9                                         | 92<br>[83 - 97]                                    | a          | 3                           |
| THK        | Tahkuse                                                                    | NA                  | LVAS         | Custom made                                                          | TSP                          | 1.8                                         | 86<br>[84 - 87]                                    | a          | 3                           |

a = 150 mm (Whatman, Maidstone, UK); b = 47 mm (Whatman, Maidstone, UK); c = PALLFLEX Tissuquartz 2500 QAT-UP (Pall, New-York, USA); HVAS = high-volume air sampler; LVAS = low-volume air sampler; PM<sub>10</sub> = particulate matter with an aerodynamic diameter <10 µm; TSP = total suspended particles; A = agriculture adjacent; NA= non-agriculture adjacent

(B)

| Site code | Sampling site                     | Sampler type | Sampler used                               | Inlet particle size fraction | Flow-rate (m <sup>3</sup> h <sup>-1</sup> ) | Sampled volume (m <sup>3</sup> )<br>Average<br>[Min-Max] | Filter QFF | Number of samples collected |
|-----------|-----------------------------------|--------------|--------------------------------------------|------------------------------|---------------------------------------------|----------------------------------------------------------|------------|-----------------------------|
| ARN       | El Arenosillo                     | HVAS         | MCV CAV-A (MCV, SA, Barcelona, ES)         | PM <sub>10</sub>             | 30/30                                       | 1465<br>[1459 - 1469]                                    | b          | 3                           |
| FKL       | Finokalia Station                 | HVAS         | TE 5170 (Tisch Environmental, Cleves, USA) | TSP                          | 49.8                                        | 3918<br>[3850 - 3986]                                    | d          | 2                           |
| MHD       | Mace Head                         | HVAS         | Sierra Andersen Impactor (USA)             | TSP                          | 97.2                                        | 4665                                                     | d, e       | 1                           |
| WEY       | Weybourne Atmospheric Observatory | HVAS         | TE 5170 (Tisch Environmental, Cleves, USA) | TSP                          | 66                                          | 3168                                                     | d          | 3                           |

a = 150 mm (Whatman, Maidstone, UK); b = 47 mm (Whatman, Maidstone, UK); c = 203 × 254 mm (Whatman, Maidstone, UK); d = slotted filters (Whatman, Maidstone, UK); HVAS = high-volume air sampler; PM<sub>10</sub> = particulate matter with an aerodynamic diameter <10 µm; TSP = total suspended particles



(C)

| Site code | Sampling site                                                         | Sampler type | Sampler used                                                                  | Inlet Particle size fraction       | Flow-rate (m <sup>3</sup> h <sup>-1</sup> ) | Sampled volume (m <sup>3</sup> )<br>Average<br>[Min-Max] | Filter QFF | Number of samples collected |
|-----------|-----------------------------------------------------------------------|--------------|-------------------------------------------------------------------------------|------------------------------------|---------------------------------------------|----------------------------------------------------------|------------|-----------------------------|
| CPK       | Chopok                                                                | LVAS         | Custom made                                                                   | PM <sub>10</sub>                   | 0.9                                         | 31 [30 - 32]                                             | b          | 2                           |
| HAC       | Helmos Mt. Hellenic Atmospheric Aerosol and Climate Change station    | HVAS         | Digitel DHA-80 (Digitel, Volketswil, CH)                                      | TSP                                | 30                                          | 1627 [1623 - 1632]                                       | a          | 2                           |
| JFJ       | Jungfrauoch                                                           | HVAS         | Digitel DHA-80 (Digitel, Volketswil, CH)                                      | PM <sub>10</sub>                   | 45                                          | 2175 [2166 - 2187]                                       | c          | 3                           |
| PDM       | Pic du Midi de Bigorre                                                | LVAS         | Custom made                                                                   | PM <sub>10</sub>                   | 2.8                                         | 133                                                      | b          | 1                           |
| SBO       | Sonnblick Observatory                                                 | HVAS         | Digitel DHA-80 (Digitel, Volketswil, CH)                                      | PM <sub>10</sub>                   | 3                                           | 323                                                      | a          | 2                           |
| UFS       | <b>Environmental Research Station Schneefernerhaus, Mt. Zugspitze</b> | HVAS/LVAS    | Digitel DHA-80 (Digitel, Volketswil, CH) / Digitel-Kroneis-Genius5 hybrid, CH | PM <sub>10</sub> /PM <sub>10</sub> | 30 /7.2                                     | 1401 [1394 - 1408] / 396 [395-397]                       | a/a        | 2/3                         |

a = 150 mm (Whatman, Maidstone, UK); b = 47 mm (Whatman, Maidstone, UK); c = PALLFLEX Tissuquartz 2500 QAT-UP (Pall, New-York, USA); HVAS = high-volume air sampler; LVAS = low-volume air sampler; PM10 = particulate matter with an aerodynamic diameter <10 µm; TSP = total suspended particles

(D)

| Site code | Sampling site                         | Sampler type | Sampler used                             | Inlet particle size fraction | Flow-rate (m <sup>3</sup> h <sup>-1</sup> ) | Sampled volume (m <sup>3</sup> ) Average [Min-Max] | Filter QFF | Number of samples collected |
|-----------|---------------------------------------|--------------|------------------------------------------|------------------------------|---------------------------------------------|----------------------------------------------------|------------|-----------------------------|
| ADA       | Andøya                                | HVAS         | Digitel DHA-77 (Digitel, Volketswil, CH) | PM <sub>10</sub>             | 30                                          | 1652 [1645 - 1656]                                 | a          | 3                           |
| PAL       | Pallas Atmosphere-Ecosystem Supersite | LVAS         | LVS 3.1 (Combde-Derenda, Stahnsdorf, DE) | PM <sub>10</sub>             | 1                                           | 47 [45 - 48]                                       | b          | 3                           |
| ZPO       | Zeppelin Observatory                  | HVAS         | Digitel DHA-77 (Digitel, Volketswil, CH) | TSP                          | 30                                          | 1357                                               | a          | 3                           |

a = 150 mm (Whatman, Maidstone, UK); b = 47 mm (Whatman, Maidstone, UK); HVAS = high-volume air sampler; LVAS = low-volume air sampler; PM<sub>10</sub> = particulate matter with an aerodynamic diameter <10 µm; TSP = total suspended particles

**Table S2.** Types of land-use within a 10 km radius for the rural, adjacent (A) and non-adjacent (B) to agricultural land, coastal (C), mountain (D) and polar (E) sites

(A)

|                                                     | BRM | CBW | CRA | KOS | MEL | OPE | PAY |
|-----------------------------------------------------|-----|-----|-----|-----|-----|-----|-----|
| Artificial surface with possible pesticides uses    | 11  | 9   | 4   | 3   | 5   | <1  | 9   |
| Artificial surface without possible pesticides uses | <1  | 1   | 1   | 0   | 2   | <1  | 1   |
| Agricultural areas                                  | 64  | 87  | 50  | 65  | 55  | 48  | 63  |
| Forest                                              | 15  | 0   | 31  | 29  | 23  | 39  | 17  |
| Shrub and/or herbaceous vegetation associations     | 2   | <1  | 14  | 3   | 14  | 12  | 7   |
| Open spaces with little or no vegetation            | 0   | 0   | 0   | 0   | 0   | 0   | 0   |
| Wetlands                                            | 0   | 1   | 0   | 0   | 0   | 0   | <1  |
| Water bodies                                        | 8   | 2   | 0   | 0   | 2   | 0   | 3   |

(B)

|                                                     | AMO | BKO | DBG | HYL | HYY | MSY | RIG | SME | THK |
|-----------------------------------------------------|-----|-----|-----|-----|-----|-----|-----|-----|-----|
| Artificial surface with possible pesticides uses    | 3   | <1  | 1   | 2   | <1  | 2   | 10  | <1  | <1  |
| Artificial surface without possible pesticides uses | 1   | <1  | 0   | <1  | <1  | <1  | 1   | 0   | <1  |
| Agricultural areas                                  | 12  | 2   | 37  | 14  | 5   | 3   | 20  | 16  | 35  |
| Forest                                              | 8   | 88  | 52  | 75  | 81  | 86  | 26  | 52  | 38  |
| Shrub and/or herbaceous vegetation associations     | 57  | 3   | 3   | 5   | 9   | 9   | 16  | 14  | 17  |
| Open spaces with little or no vegetation            | 0   | 0   | 0   | 0   | 0   | 0   | 0   | 0   | 0   |
| Wetlands                                            | 17  | 2   | <1  | 2   | 2   | 0   | 1   | 11  | 9   |
| Water bodies                                        | 1   | 4   | 7   | 2   | 2   | 0   | 26  | 7   | 0   |

(C)

|                                                     | ARN | FKL | MHD | WEY |
|-----------------------------------------------------|-----|-----|-----|-----|
| Artificial surface with possible pesticides uses    | <1  | <1  | <1  | 3   |
| Artificial surface without possible pesticides uses | <1  | <1  | 0   | 0   |
| Agricultural areas                                  | 0   | 15  | 9   | 36  |
| Forest                                              | 7   | <1  | <1  | 6   |
| Shrub and/or herbaceous vegetation associations     | 39  | 31  | <1  | 4   |
| Open spaces with little or no vegetation            | 19  | 0   | 4   | 0   |
| Wetlands                                            | 0   | 0   | 17  | 4   |
| Water bodies                                        | 35  | 53  | 69  | 46  |

(D)

|                                                     | CPK | HAC | JFJ | PDM | SBO | UFS |
|-----------------------------------------------------|-----|-----|-----|-----|-----|-----|
| Artificial surface with possible pesticides uses    | 3   | <1  | 1   | 0   | <1  | 3   |
| Artificial surface without possible pesticides uses | 0   | 0   | 0   | 0   | <1  | <1  |
| Agricultural areas                                  | <1  | 11  | <1  | 2   | <1  | <1  |
| Forest                                              | 65  | 44  | 12  | 19  | 14  | 49  |
| Shrub and/or herbaceous vegetation associations     | 31  | 38  | 20  | 49  | 50  | 21  |
| Open spaces with little or no vegetation            | <1  | 7   | 67  | 30  | 34  | 25  |
| Wetlands                                            | 0   | 0   | 0   | 0   | 0   | <1  |
| Water bodies                                        | 0   | <1  | 0   | <1  | <1  | 1   |

(E)

|                                                     | ADA | PAL | ZPO |
|-----------------------------------------------------|-----|-----|-----|
| Artificial surface with possible pesticides uses    | <1  | 0   | 0   |
| Artificial surface without possible pesticides uses | 1   | 0   | 0   |
| Agricultural areas                                  | 2   | 0   | 0   |
| Forest                                              | 4   | 71  | 0   |
| Shrub and/or herbaceous vegetation associations     | 12  | 7   | 8   |
| Open spaces with little or no vegetation            | 3   | 2   | 38  |
| Wetlands                                            | 19  | 10  | 0   |
| Water bodies                                        | 59  | 11  | 55  |

**Table S3.** Allocation of this study land use categories to Corine Land Cover (A) and Global

Land Cover (B) categories

(A)

| <b>This study's land-use categories</b>             | <b>Corine Land Cover 2018 nomenclature</b>                                                                                                                                                                                                                                                                                        |
|-----------------------------------------------------|-----------------------------------------------------------------------------------------------------------------------------------------------------------------------------------------------------------------------------------------------------------------------------------------------------------------------------------|
| Artificial surface with possible pesticides uses    | discontinuous urban fabric; roads and rail networks and associated land; green urban areas; sport and leisure facilities                                                                                                                                                                                                          |
| Artificial surface without possible pesticides uses | continuous urban fabric; industrial or commercial units; port areas; airports; mineral extraction sites; dump sites; construction sites                                                                                                                                                                                           |
| Agricultural areas                                  | non-irrigated arable land; permanently irrigated land; rice fields; vineyards; fruit trees and berry plantations; olive groves; pastures; annual crops associated with permanent crops; complex cultivation patterns; land principally occupied by agriculture, with significant areas of natural vegetation; agro-forestry areas |
| Forest                                              | broad-leaved forest; coniferous forest; mixed forest                                                                                                                                                                                                                                                                              |
| Shrub and/or herbaceous vegetation associations     | natural grasslands; moors and heathland; sclerophyllous vegetation; transitional woodland-shrub                                                                                                                                                                                                                                   |
| Open spaces with little or no vegetation            | beaches, dunes, sands; bare rocks, sparsely vegetated areas; burnt areas; glaciers and perpetual snow                                                                                                                                                                                                                             |
| Wetlands                                            | industrial or commercial units; peat bogs; salt marshes; salines; intertidal flats; unclassified land surface                                                                                                                                                                                                                     |
| Water bodies                                        | water courses; water bodies; coastal lagoons; estuaries; sea and ocean; unclassified water bodies                                                                                                                                                                                                                                 |

(B)

| <b>This study's land-use categories</b>             | <b>Global Land Cover 2000</b>                                                                                                                                                                                                                                                                                                                                                                     |
|-----------------------------------------------------|---------------------------------------------------------------------------------------------------------------------------------------------------------------------------------------------------------------------------------------------------------------------------------------------------------------------------------------------------------------------------------------------------|
| Artificial surface without possible pesticides uses | artificial surfaces and associated areas                                                                                                                                                                                                                                                                                                                                                          |
| Agricultural areas                                  | cropland/tree cover/other natural vegetation; cropland/shrub and/or herbaceous cover                                                                                                                                                                                                                                                                                                              |
| Forest                                              | tree cover, broadleaved, evergreen; tree cover, broadleaved, deciduous, closed; tree cover, broadleaved, deciduous, open; tree cover, needle-leaved, evergreen; tree cover, needle-leaved, deciduous; tree cover, mixed leaf type; tree cover, regularly flooded, fresh water (and brackish); tree cover, regularly flooded, saline water; tree cover/other natural vegetation; tree cover, burnt |
| Shrub and/or herbaceous vegetation associations     | shrub cover, closed-open, evergreen; shrub cover, closed-open, deciduous; herbaceous cover, closed-open; sparse herbaceous or sparse shrub cover; regularly flooded shrub and/or herbaceous cover                                                                                                                                                                                                 |
| Open spaces with little or no vegetation            | bare areas; snow and ice (natural & artificial)                                                                                                                                                                                                                                                                                                                                                   |
| Water bodies                                        | water bodies (natural & artificial)                                                                                                                                                                                                                                                                                                                                                               |

**Table S4.** Information on the chemical analysis performed and standards used for individual herbicides (A), insecticides (B) and fungicides (C)

(A)

| Pesticide        | Instrument              | Native standard used         | Internal standard                   |
|------------------|-------------------------|------------------------------|-------------------------------------|
| 2,4-D            | HPLC-MS/MS <sup>a</sup> | Neochemia (Germany)          | 2,4-D - 13C6 <sup>d</sup>           |
| 2,4-MCPA         | UPLC-MS/MS <sup>c</sup> | Neochemia (Germany)          | TPP <sup>k</sup>                    |
| Acetochlor       | HPLC-MS/MS <sup>a</sup> | Neochemia (Germany)          | Acetochlor-D11 <sup>e</sup>         |
| Aclonifen        | GC-MS/MS <sup>b</sup>   | None                         | Prosulfocarb-D7 <sup>g</sup>        |
| Alachlor         | HPLC-MS/MS <sup>a</sup> | Neochemia (Germany)          | Alachlor-D13 <sup>e</sup>           |
| Atrazine         | HPLC-MS/MS <sup>a</sup> | Chromservis (Czech Republic) | Atrazine-D5 <sup>h</sup>            |
| Chloridazon      | HPLC-MS/MS <sup>a</sup> | Chromservis (Czech Republic) | Pyrazon-D5 <sup>e</sup>             |
| Chlorotoluron    | HPLC-MS/MS <sup>a</sup> | Neochemia (Germany)          | Chlortoluron-D6 <sup>e</sup>        |
| Chlorpropham     | GC-MS/MS <sup>b</sup>   | None                         | Prosulfocarb-D7 <sup>g</sup>        |
| Chlorsulfuron    | HPLC-MS/MS <sup>a</sup> | Neochemia (Germany)          | Metamitron-D5 <sup>f</sup>          |
| Clomazone        | GC-MS/MS <sup>b</sup>   | None                         | Prosulfocarb-D7 <sup>g</sup>        |
| Diclofop-methyl  | GC-MS/MS <sup>b</sup>   | None                         | Prosulfocarb-D7 <sup>g</sup>        |
| Diflufenican     | GC-MS/MS <sup>b</sup>   | None                         | Boscalid-D4 <sup>d</sup>            |
| Dimethachlor     | HPLC-MS/MS <sup>a</sup> | Chromservis (Czech Republic) | Diuron-D6 <sup>h</sup>              |
| Dimethenamid-P   | GC-MS/MS <sup>b</sup>   | None                         | Kresoxim-methyl-D7 <sup>d</sup>     |
| Diuron           | HPLC-MS/MS <sup>a</sup> | Chromservis (Czech Republic) | Diuron-D6 <sup>h</sup>              |
| Flumioxazin      | GC-MS/MS <sup>b</sup>   | None                         | Boscalid-D4 <sup>d</sup>            |
| Flurochloridone  | GC-MS/MS <sup>b</sup>   | None                         | Chlorpyrifos methyl-D6 <sup>d</sup> |
| Fluroxypyr       | HPLC-MS/MS <sup>a</sup> | Neochemia (Germany)          | Metribuzin-D3 <sup>f</sup>          |
| Isoproturon      | HPLC-MS/MS <sup>a</sup> | Chromservis (Czech Republic) | Isoproturon-D3 <sup>f</sup>         |
| Lenacil          | GC-MS/MS <sup>b</sup>   | None                         | Prosulfocarb-D7 <sup>g</sup>        |
| Linuron          | GC-MS/MS <sup>b</sup>   | None                         | Prosulfocarb-D7 <sup>g</sup>        |
| Mecoprop         | HPLC-MS/MS <sup>a</sup> | Neochemia (Germany)          | Mecoprop-D6 <sup>f</sup>            |
| Metamitron       | HPLC-MS/MS <sup>a</sup> | Chromservis (Czech Republic) | Metamitron-D5 <sup>f</sup>          |
| Metazachlor      | HPLC-MS/MS <sup>a</sup> | Neochemia (Germany)          | Metazachlor-D6 <sup>i</sup>         |
| Metribuzin       | HPLC-MS/MS <sup>a</sup> | Chromservis (Czech Republic) | Metribuzin-D3 <sup>f</sup>          |
| Oxadiazon        | HPLC-MS/MS <sup>a</sup> | Neochemia (Germany)          | Aldicarb-D3 <sup>d</sup>            |
| Pendimethalin    | HPLC-MS/MS <sup>a</sup> | Chromservis (Czech Republic) | Pendimethalin-D5 <sup>f</sup>       |
| Prosulfocarb     | HPLC-MS/MS <sup>a</sup> | Neochemia (Germany)          | Prosulfocarb-D7 <sup>g</sup>        |
| Quizalofop ethyl | HPLC-MS/MS <sup>a</sup> | Neochemia (Germany)          | Quizalofop ethyl-D3 <sup>i</sup>    |
| Simazine         | HPLC-MS/MS <sup>a</sup> | Chromservis (Czech Republic) | Simazine-D10 <sup>f</sup>           |
| S-Metolachlor    | HPLC-MS/MS <sup>a</sup> | Neochemia (Germany)          | Metolachlor-D6 <sup>e</sup>         |
| Sulcotrione      | UPLC-MS/MS <sup>c</sup> | None                         | TPP <sup>k</sup>                    |
| Terbutylazine    | HPLC-MS/MS <sup>a</sup> | Chromservis (Czech Republic) | Terbutylazine-D5 <sup>e</sup>       |
| Triallate        | GC-MS/MS <sup>b</sup>   | Neochemia (Germany)          | Triallate-13C6 <sup>j</sup>         |

<sup>a</sup> Agilent 1290 (Agilent Technologies, Palo, Alto, California, USA), Mass spectrometer: QTRAP 5500 (AB Sciex, Foster City, California, USA); <sup>b</sup> Trace GC Ultra (Thermo Scientific, Waltham, MA, USA), Mass spectrometer: TSQ Quantum™ Triple Quadrupole (Thermo Scientific, Waltham, Massachusetts, USA); <sup>c</sup> Acquity (Waters, Milford, Massachusetts, USA), Mass spectrometer: Synapt G2 HDMS (Waters, Milford, Massachusetts, USA); <sup>d</sup> Toronto Research Chemicals Inc. (Canada); <sup>e</sup> LGC Dr. Ehrenstorfer (Germany); <sup>f</sup> HPC Standards GmbH (Germany); <sup>g</sup> ASCA GmbH (Germany); <sup>h</sup> Restek (United States); <sup>i</sup> Chiron AS (Norway); <sup>j</sup> Cambridge Isotope Laboratories, Inc. (United States); <sup>k</sup> Sigma-Aldrich (United States); HPLC = High performance liquid chromatography; UPLC = Ultra-performance liquid chromatography; GC = Gas chromatography; MS/MS = Tandem mass spectrometer; TPP = Triphenyl phosphate

(B)

| <b>Pesticide</b> | <b>Instrument</b>       | <b>Native standard used</b>  | <b>Internal standard</b>      |
|------------------|-------------------------|------------------------------|-------------------------------|
| Acetamiprid      | HPLC-MS/MS <sup>a</sup> | Neochema (Germany)           | Acetamiprid-D3 <sup>e</sup>   |
| Azinphos methyl  | HPLC-MS/MS <sup>a</sup> | Chromservis (Czech Republic) | Fenitrothion-D6 <sup>d</sup>  |
| Carbaryl         | HPLC-MS/MS <sup>a</sup> | Neochema (Germany)           | Diuron-D6 <sup>g</sup>        |
| Carbofuran       | HPLC-MS/MS <sup>a</sup> | Neochema (Germany)           | Carbofuran-D3 <sup>c</sup>    |
| Chlorpyrifos     | HPLC-MS/MS <sup>a</sup> | Chromservis (Czech Republic) | Chlorpyrifos-D10 <sup>d</sup> |
| Cypermethrin     | GC-MS/MS <sup>b</sup>   | Neochema (Germany)           | Permethrin-D5 <sup>c</sup>    |
| Diazinon         | HPLC-MS/MS <sup>a</sup> | Chromservis (Czech Republic) | Diuron-D6 <sup>g</sup>        |
| Dimethoate       | HPLC-MS/MS <sup>a</sup> | Neochema (Germany)           | Dimethoate-D6 <sup>e</sup>    |
| Disulfoton       | HPLC-MS/MS <sup>a</sup> | Neochema (Germany)           | Chlorpyrifos-D10 <sup>d</sup> |
| Esbiothrin       | GC-MS/MS <sup>b</sup>   | None                         | Prosulfocarb-D7 <sup>f</sup>  |
| Fenitrothion     | HPLC-MS/MS <sup>a</sup> | Neochema (Germany)           | Fenitrothion-D6 <sup>d</sup>  |
| Fenoxycarb       | GC-MS/MS <sup>b</sup>   | None                         | Prosulfocarb-D7 <sup>f</sup>  |
| Fipronil         | GC-MS/MS <sup>b</sup>   | None                         | Prosulfocarb-D7 <sup>f</sup>  |
| Fonofos          | HPLC-MS/MS <sup>a</sup> | Chromservis (Czech Republic) | Diuron-D6 <sup>g</sup>        |
| Malathion        | HPLC-MS/MS <sup>a</sup> | Neochema (Germany)           | Simazine-D10 <sup>e</sup>     |
| Parathion methyl | HPLC-MS/MS <sup>a</sup> | Chromservis (Czech Republic) | Fenitrothion-D6 <sup>d</sup>  |
| Permethrin       | GC-MS/MS <sup>b</sup>   | Neochema (Germany)           | Permethrin-D5 <sup>c</sup>    |
| Phosalone        | HPLC-MS/MS <sup>a</sup> | Neochema (Germany)           | Phosalone-D10 <sup>d</sup>    |
| Pirimicarb       | HPLC-MS/MS <sup>a</sup> | Neochema (Germany)           | Diuron-D6 <sup>g</sup>        |
| Temephos         | HPLC-MS/MS <sup>a</sup> | Neochema (Germany)           | Chlorpyrifos-D10 <sup>d</sup> |
| Terbufos         | HPLC-MS/MS <sup>a</sup> | Neochema (Germany)           | Diuron-D6 <sup>g</sup>        |
| Thiacloprid      | HPLC-MS/MS <sup>a</sup> | Neochema (Germany)           | Thiacloprid-D4 <sup>c</sup>   |

<sup>a</sup> Agilent 1290 (Agilent Technologies, Palo, Alto, California, USA), Mass spectrometer: QTRAP 5500 (AB Sciex, Foster City, California, USA); <sup>b</sup> Trace GC Ultra (Thermo Scientific, Waltham, MA, USA), Mass spectrometer: TSQ Quantum™ Triple Quadrupole (Thermo Scientific, Waltham, Massachusetts, USA); <sup>c</sup> Toronto Research Chemicals Inc. (Canada); <sup>d</sup> LGC Dr. Ehrenstorfer (Germany); <sup>e</sup> HPC Standards GmbH (Germany); <sup>f</sup> ASCA GmbH (Germany); <sup>g</sup> Restek (United States); HPLC = High performance liquid chromatography; GC = Gas chromatography; MS/MS = Tandem mass spectrometer

(C)

| Pesticide       | Instrument              | Native standard used         | Internal standard               |
|-----------------|-------------------------|------------------------------|---------------------------------|
| Boscalid        | HPLC-MS/MS <sup>a</sup> | Neochema (Germany)           | Boscalid-D4 <sup>d</sup>        |
| Carbendazim     | HPLC-MS/MS <sup>a</sup> | Neochema (Germany)           | Carbendazim-D4 <sup>f</sup>     |
| Cyprodinil      | HPLC-MS/MS <sup>a</sup> | Neochema (Germany)           | Cyprodinil-D5 <sup>d</sup>      |
| Difenoconazole  | GC-MS/MS <sup>b</sup>   | None                         | Prosulfocarb-D7 <sup>g</sup>    |
| Dimethomorph    | GC-MS/MS <sup>b</sup>   | None                         | Permethrin-D5 <sup>d</sup>      |
| Epoxiconazole   | GC-MS/MS <sup>b</sup>   | None                         | Kresoxim-methyl-D7 <sup>d</sup> |
| Fenpropidin     | HPLC-MS/MS <sup>a</sup> | Neochema (Germany)           | Fenpropidin-D10 <sup>d</sup>    |
| Fenpropimorph   | HPLC-MS/MS <sup>a</sup> | Chromservis (Czech Republic) | Diuron-D6 <sup>h</sup>          |
| Fluazinam       | UPLC-MS/MS <sup>c</sup> | None                         | TPP <sup>i</sup>                |
| Flusilazole     | GC-MS/MS <sup>b</sup>   | None                         | Prosulfocarb-D7 <sup>g</sup>    |
| Iprovalicarb    | HPLC-MS/MS <sup>a</sup> | Neochema (Germany)           | Aldicarb-D3 <sup>d</sup>        |
| Kresoxim-methyl | HPLC-MS/MS <sup>a</sup> | Neochema (Germany)           | Kresoxim-methyl-D7 <sup>d</sup> |
| Metalaxyl       | HPLC-MS/MS <sup>a</sup> | Neochema (Germany)           | Metalaxyl-D6 <sup>d</sup>       |
| Prochloraz      | HPLC-MS/MS <sup>a</sup> | Chromservis (Czech Republic) | Prochloraz-D7 <sup>e</sup>      |
| Propiconazole   | HPLC-MS/MS <sup>a</sup> | Neochema (Germany)           | Propiconazole-D5 <sup>e</sup>   |
| Pyrimethanil    | GC-MS/MS <sup>b</sup>   | None                         | Boscalid-D4 <sup>d</sup>        |
| Spiroxamine     | HPLC-MS/MS <sup>a</sup> | Neochema (Germany)           | Spiroxamine-D4 <sup>d</sup>     |
| Tebuconazole    | HPLC-MS/MS <sup>a</sup> | Chromservis (Czech Republic) | Tebuconazole-D6 <sup>e</sup>    |
| Tetraconazole   | GC-MS/MS <sup>b</sup>   | None                         | Prosulfocarb-D7 <sup>g</sup>    |

<sup>a</sup> Agilent 1290 (Agilent Technologies, Palo, Alto, California, USA), Mass spectrometer: QTRAP 5500 (AB Sciex, Foster City, California, USA); <sup>b</sup> Trace GC Ultra (Thermo Scientific, Waltham, MA, USA), Mass spectrometer: TSQ QuantumTM Triple Quadrupole (Thermo Scientific, Waltham, Massachusetts, USA); <sup>c</sup> Acquity (Waters, Milford, Massachusetts, USA), Mass spectrometer: Synapt G2 HDMS (Waters, Milford, Massachusetts, USA); <sup>d</sup> Toronto Research Chemicals Inc. (Canada); <sup>e</sup> LGC Dr. Ehrenstorfer (Germany); <sup>f</sup> HPC Standards GmbH (Germany); <sup>g</sup> ASCA GmbH (Germany); <sup>h</sup> Restek (United States); <sup>i</sup> Sigma-Aldrich (United States); HPLC = High performance liquid chromatography; UPLC = Ultra-performance liquid chromatography; GC = Gas chromatography; MS/MS = Tandem mass spectrometer; TPP = Triphenyl phosphate



**Table S5.** Information on the individual herbicides (A), insecticides (B) and fungicides (C) analysed in this study

| (A)             |                          |                              |                                                   |                                |                                      |                                                                                                                |                       |                                        |                                                    |                                          |                                   |
|-----------------|--------------------------|------------------------------|---------------------------------------------------|--------------------------------|--------------------------------------|----------------------------------------------------------------------------------------------------------------|-----------------------|----------------------------------------|----------------------------------------------------|------------------------------------------|-----------------------------------|
| Pesticide       | CAS number <sup>57</sup> | Chemical class <sup>57</sup> | Status under Reg. (EC) No 1107/2009 <sup>75</sup> | Date of approval <sup>75</sup> | Expiration of approval <sup>75</sup> | Countries in which the pesticide is or lately was authorized <sup>75</sup>                                     | Biocide <sup>55</sup> | Used in the top 20 crops <sup>72</sup> | Priority active ingredient in France <sup>73</sup> | Highly hazardous pesticide <sup>74</sup> | High risk pesticide <sup>74</sup> |
| 2,4-D           | 94-75-7 4                | Alkylchlorophenoxy           | Approved                                          | 01/01/2016                     | 31/12/2030                           | AT, BE, BG, CY, CZ, DE, DK, EE, EL, ES, FI, FR, HR, HU, IE, IT, LT, LU, LV, MT, NL, PL, PT, RO, SE, SI, SK, UK |                       | Yes                                    | Yes                                                |                                          |                                   |
| 2,4-MCPA        | 94-74-6                  | Aryloxyalkanoic acid         | Approved                                          | 01/05/2006                     | 31/10/2022                           | AT, BE, BG, CY, CZ, DE, DK, EE, EL, ES, FI, FR, HR, HU, IE, LT, LU, LV, MT, NL, PL, PT, RO, SE, SI, SK         |                       |                                        |                                                    |                                          |                                   |
| Acetochlor      | 34256-82-1               | Chloroacetamide              | Not approved                                      |                                |                                      |                                                                                                                |                       | Yes                                    | Yes                                                |                                          |                                   |
| Aclonifen       | 74070-46-5               | Diphenyl ether               | Approved                                          | 01/08/2009                     | 31/07/2022                           | AT, BE, BG, CY, CZ, DE, DK, EE, EL, ES, FI, FR, HR, HU, IE, IT, LT, LU, LV, NL, PL, PT, RO, SE, SI, SK, UK     |                       |                                        |                                                    |                                          |                                   |
| Alachlor        | 15972-60-8               | Chloroacetamide              | Not approved                                      |                                |                                      |                                                                                                                |                       | Yes                                    |                                                    | Yes                                      |                                   |
| Atrazine        | 1912-24-9                | Triazine                     | Not approved                                      |                                |                                      |                                                                                                                |                       | Yes                                    |                                                    | Yes                                      |                                   |
| Chloridazon     | 1698-60-8                | Pyridazinone                 | Not approved                                      |                                | 31/12/2018                           | HU, NL, PL, UK                                                                                                 |                       |                                        |                                                    |                                          |                                   |
| Chlorotoluron   | 15545-48-9               | Urea                         | Not approved                                      | 01/01/2010                     | 31/12/2019                           |                                                                                                                |                       |                                        |                                                    |                                          |                                   |
| Chlorpropham    | 101-21-3                 | Carbamate                    | Approved                                          | 01/03/2006                     | 31/10/2022                           | AT, BE, BG, CZ, DE, EE, EL, ES, FR, HR, HU, IE, LV, PL, PT, RO, SI, SK, UK                                     |                       |                                        | Yes                                                |                                          |                                   |
| Chlorsulfuron   | 15545-48-9               | Urea                         | Not approved                                      | 01/01/2010                     | 31/12/2019                           |                                                                                                                |                       |                                        |                                                    |                                          |                                   |
| Clomazone       | 81777-89-1               | Isoxazolidinone              | Approved                                          | 01/11/2008                     | 31/10/2022                           | AT, BE, BG, CY, CZ, DE, DK, EE, EL, ES, FR, HR, HU, IE, LT, LU, LV, MT, NL, PL, PT, RO, SE, SI, SK, UK         |                       | Yes                                    | Yes                                                |                                          |                                   |
| Diclofop-methyl | 51338-27-3               | Aryloxyphenoxypropionate     | Approved                                          | 01/06/2011                     | 31/05/2023                           | EL, ES, PT                                                                                                     |                       |                                        |                                                    |                                          | Yes                               |
| Diflufenican    | 83164-33-4               | Carboxamide                  | Approved                                          | 01/01/2009                     | 31/12/2022                           | AT, BE, BG, CY, CZ, DE, DK, EE, EL, ES, FI, FR, HR, HU, IE, LT, LU, LV, MT, NL, PL, PT, RO, SE, SI, SK, UK     |                       |                                        | Yes                                                |                                          |                                   |
| Dimethachlor    | 50563-36-5               | Chloroacetamide              | Approved                                          | 01/01/2010                     | 31/12/2022                           | AT, BG, CZ, DE, EE, FR, HR, HU, IE, LT, LV, PL, RO, SI, SK, UK                                                 |                       |                                        |                                                    |                                          |                                   |

**Table S5.** Information on the individual herbicides (A), insecticides (B) and fungicides (C) analysed in this study (continued)

| (A)<br>Pesticide | CAS number <sup>57</sup> | Chemical class <sup>57</sup> | Status under Reg. (EC) No 1107/2009 <sup>75</sup> | Date of approval <sup>75</sup> | Expiration of approval <sup>75</sup> | Countries in which the pesticide is or lately was authorized <sup>75</sup>                                 | Biocide <sup>55</sup> | Used in the top 20 crops <sup>72</sup> | Priority active ingredient in France <sup>73</sup> | Highly hazardous pesticide <sup>74</sup> | High risk pesticide <sup>74</sup> |
|------------------|--------------------------|------------------------------|---------------------------------------------------|--------------------------------|--------------------------------------|------------------------------------------------------------------------------------------------------------|-----------------------|----------------------------------------|----------------------------------------------------|------------------------------------------|-----------------------------------|
| Dimethenamid-P   | 163515-14-8              | Chloroacetamide              | Approved                                          | 01/09/2019                     | 31/08/2034                           | AT, BE, BG, CY, CZ, DE, EL, ES, FI, FR, HR, HU, IE, LT, LU, LV, NL, PL, PT, RO, SE, SI, SK, UK             |                       | Yes                                    | Yes                                                |                                          | Yes                               |
| Diuron           | 330-54-1                 | Phenylamide                  | Not approved                                      | 01/10/2008                     | 30/09/2020                           | IT                                                                                                         |                       | Yes                                    | Yes                                                |                                          |                                   |
| Flumioxazin      | 103361-09-7              | N-phenylphthalamides         | Approved                                          | 01/01/2003                     | 28/02/2037                           | AT, BE, BG, CZ, DE, EL, ES, HR, HU, IE, LV, NL, RO, UK                                                     |                       | Yes                                    |                                                    | Yes                                      |                                   |
| Flurochloridone  | 61213-25-0               | Pyrrolidine                  | Approved                                          | 01/06/2011                     | 31/05/2022                           | CZ, EL, FR, HR, HU, IT, PL, RO, SK                                                                         |                       |                                        |                                                    |                                          |                                   |
| Fluroxypyr       | 69377-81-7               | Pyridine                     | Approved                                          | 01/01/2012                     | 31/12/2024                           | AT, BE, BG, CY, CZ, DE, DK, EE, EL, ES, FI, FR, HR, HU, IE, LT, LU, LV, MT, NL, PL, PT, RO, SE, SI, SK, UK |                       | Yes                                    |                                                    |                                          |                                   |
| Isoproturon      | 34123-59-6               | Urea                         | Not approved                                      |                                | 30/06/2016                           | IT, LT, NL                                                                                                 |                       |                                        |                                                    |                                          |                                   |
| Lenacil          | 01/08/2164               | Uracil                       | Approved                                          | 01/01/2009                     | 31/12/2022                           | AT, BE, CY, CZ, DE, EL, ES, FR, HU, IE, NL, PL, PT, RO, SK, UK                                             |                       |                                        | Yes                                                |                                          | Yes                               |
| Linuron          | 330-55-2                 | Urea                         | Not approved                                      | 01/01/2004                     | 31/07/2017                           |                                                                                                            |                       |                                        | Yes                                                |                                          |                                   |
| Mecoprop         | 7085-19-0                | Aryloxyalkanoic acid         | Not approved                                      | 01/06/2004                     | 31/01/2017                           | IT                                                                                                         |                       |                                        |                                                    |                                          |                                   |
| Metamitron       | 41394-05-2               | Triazinone                   | Approved                                          | 01/09/2009                     | 31/08/2022                           | AT, BE, CY, CZ, DE, DK, EE, EL, ES, FI, FR, HR, HU, IE, IT, LT, LU, LV, MT, NL, PL, PT, RO, SE, SI, SK, UK |                       |                                        | Yes                                                |                                          |                                   |
| Metazachlor      | 67129-08-2               | Chloroacetamide              | Approved                                          | 01/08/2009                     | 31/07/2022                           | AT, BE, BG, CY, CZ, DE, EE, EL, ES, FI, FR, HR, HU, IE, IT, LT, LU, LV, MT, NL, PL, PT, RO, SI, SK, UK     |                       |                                        | Yes                                                |                                          |                                   |
| Metribuzin       | 21087-64-9               | Triazinone                   | Approved                                          | 01/10/2007                     | 31/07/2022                           | AT, BE, BG, CY, CZ, DE, EE, EL, ES, FI, FR, HR, HU, IE, IT, LU, LV, MT, NL, PL, PT, RO, SE, SI, SK, UK     |                       | Yes                                    | Yes                                                |                                          | Yes                               |
| Oxadiazon        | 19666-30-9               | Oxidiazole                   | Not approved                                      |                                | 31/12/2018                           |                                                                                                            |                       |                                        | Yes                                                |                                          | Yes                               |
| Pendimethalin    | 40487-42-1               | Dinitroaniline               | Approved                                          | 01/09/2017                     | 30/11/2024                           | AT, BE, BG, CY, CZ, DE, DK, EE, EL, ES, FI, FR, HR, HU, IE, LT, LU, LV, MT, NL, PL, PT, RO, SI, SK, UK     |                       | Yes                                    | Yes                                                |                                          | Yes                               |

**Table S5.** Information on the individual herbicides (A), insecticides (B) and fungicides (C) analysed in this study (continued)

(A)

| Pesticide        | CAS number <sup>57</sup> | Chemical class <sup>57</sup> | Status under Reg. (EC) No 1107/2009 <sup>75</sup> | Date of approval <sup>75</sup> | Expiration of approval <sup>75</sup> | Countries in which the pesticide is or lately was authorized <sup>75</sup>                             | Biocide <sup>55</sup> | Used in the top 20 crops <sup>72</sup> | Priority active ingredient in France <sup>73</sup> | Highly hazardous pesticide <sup>74</sup> | High risk pesticide <sup>74</sup> |
|------------------|--------------------------|------------------------------|---------------------------------------------------|--------------------------------|--------------------------------------|--------------------------------------------------------------------------------------------------------|-----------------------|----------------------------------------|----------------------------------------------------|------------------------------------------|-----------------------------------|
| Prosulfocarb     | 52888-80-9               | Thiocarbamate                | Approved                                          | 01/11/2009                     | 31/10/2022                           | AT, BE, BG, CY, CZ, DE, DK, EE, EL, ES, FI, FR, HR, HU, IE, LT, LU, LV, NL, PL, PT, RO, SE, SI, SK, UK |                       |                                        | Yes                                                |                                          |                                   |
| Quizalofop ethyl | 76578-14-8               | Aryloxyphenoxypropionate     | Approved                                          | 01/12/2009                     | 30/11/2022                           | AT, BE, BG, CY, CZ, DE, EE, EL, ES, FI, FR, HR, HU, IE, LT, LU, LV, MT, NL, PL, PT, RO, SE, SI, SK, UK |                       |                                        |                                                    |                                          |                                   |
| Simazine         | 122-34-9                 | Triazine                     | Not approved                                      |                                |                                      |                                                                                                        |                       | Yes                                    |                                                    |                                          | Yes                               |
| S-Metolachlor    | 87392-12-9               | Chloroacetamide              | Approved                                          | 01/04/2005                     | 31/07/2022                           | AT, BE, BG, CY, CZ, DE, EL, ES, FR, HR, HU, IE, IT, LU, MT, NL, PL, PT, RO, SI, SK, UK                 |                       | Yes                                    | Yes                                                |                                          | Yes                               |
| Sulcotrione      | 99105-77-8               | Triketone                    | Approved                                          | 01/09/2009                     | 31/08/2022                           | BE, BG, CZ, DE, EL, ES, FR, HU, LU, NL, PL, PT, RO, SK                                                 |                       |                                        |                                                    |                                          |                                   |
| Terbuthylazine   | 5915-41-3                | Triazine                     | Approved                                          | 01/01/2012                     | 31/12/2024                           | AT, BE, BG, CY, CZ, DE, EL, ES, FR, HR, HU, IE, IT, LU, MT, NL, PL, PT, RO, SI, SK, UK                 |                       |                                        |                                                    |                                          |                                   |
| Triallate        | 2303-17-5                | Thiocarbamate                | Approved                                          | 01/01/2010                     | 31/12/2022                           | BE, FR, IE, NL, UK                                                                                     |                       | Yes                                    | Yes                                                |                                          | Yes                               |

EU countries code glossary: [https://ec.europa.eu/eurostat/statistics-explained/index.php?title=Glossary:Country\\_codes](https://ec.europa.eu/eurostat/statistics-explained/index.php?title=Glossary:Country_codes)

**Table S5.** Information on the individual herbicides (A), insecticides (B) and fungicides (C) analysed in this study (continued)

| (B)              |                          |                              |                                                   |                                |                                      |                                                                                                                |                       |                                        |                                                    |                                          |                                   |
|------------------|--------------------------|------------------------------|---------------------------------------------------|--------------------------------|--------------------------------------|----------------------------------------------------------------------------------------------------------------|-----------------------|----------------------------------------|----------------------------------------------------|------------------------------------------|-----------------------------------|
| Pesticide        | CAS number <sup>57</sup> | Chemical class <sup>57</sup> | Status under Reg. (EC) No 1107/2009 <sup>75</sup> | Date of approval <sup>75</sup> | Expiration of approval <sup>75</sup> | Countries in which the pesticide is or lately was authorized <sup>75</sup>                                     | Biocide <sup>55</sup> | Used in the top 20 crops <sup>72</sup> | Priority active ingredient in France <sup>73</sup> | Highly hazardous pesticide <sup>74</sup> | High risk pesticide <sup>74</sup> |
| Acetamiprid      | 135410-20-7              | Neonicotinoid                | Approved                                          | 01/03/2018                     | 28/02/2033                           | AT, BE, BG, CY, CZ, DE, DK, EE, EL, ES, FI, FR, HR, HU, IE, IT, LT, LU, LV, MT, NL, PL, PT, RO, SE, SI, SK, UK | X                     |                                        |                                                    |                                          |                                   |
| Azinphos methyl  | 86-50-0                  | Organophosphate              | Not approved                                      |                                |                                      |                                                                                                                |                       |                                        |                                                    | X                                        |                                   |
| Carbaryl         | 63-25-2                  | Carbamate                    | Not approved                                      |                                |                                      |                                                                                                                |                       | X                                      |                                                    |                                          | X                                 |
| Carbofuran       | 1563-66-2                | Carbamate                    | Not approved                                      |                                |                                      |                                                                                                                |                       |                                        |                                                    | X                                        |                                   |
| Chlorpyrifos     | 2921-88-2                | Organophosphate              | Not approved                                      | 01/02/2005                     | 08/07/2019                           | EE, UK                                                                                                         |                       | X                                      | X                                                  |                                          | X                                 |
| Cypermethrin     | 52315-07-8               | Pyrethroid                   | Approved                                          | 01/02/2022                     | 31/01/2029                           | AT, BE, BG, CY, CZ, DE, DK, EE, EL, ES, FI, FR, HR, HU, IE, LT, LU, LV, MT, NL, PL, PT, RO, SE, SI, SK, UK     | X                     |                                        | X                                                  |                                          | X                                 |
| Diazinon         | 333-41-5                 | Organophosphate              | Not approved                                      |                                |                                      | IT                                                                                                             |                       |                                        |                                                    |                                          | X                                 |
| Dimethoate       | 60-51-5                  | Organophosphate              | Not approved                                      | 01/10/2007                     | 30/06/2019                           | BE, IT, UK                                                                                                     |                       | X                                      | X                                                  |                                          | X                                 |
| Disulfoton       | 298-04-4                 | Organophosphate              | Not approved                                      |                                |                                      |                                                                                                                |                       |                                        |                                                    | X                                        |                                   |
| Esbiothrine      | 260359-57-7              | Pyrethroid                   | Not approved                                      |                                |                                      |                                                                                                                |                       |                                        |                                                    |                                          |                                   |
| Fenitrothion     | 122-14-5                 | Organophosphate              | Not approved                                      |                                |                                      |                                                                                                                |                       |                                        |                                                    |                                          | X                                 |
| Fenoxycarb       | 72490-01-8               | Carbamate                    | Not approved                                      | 01/06/2011                     | 31/05/2021                           | BE, CY, EL, ES, HR, HU, NL, PT                                                                                 | X                     |                                        |                                                    |                                          | X                                 |
| Fipronil         | 120068-37-3              | Phenylpyrazole               | Not approved                                      |                                | 30/09/2017                           |                                                                                                                | X                     |                                        | X                                                  | X                                        |                                   |
| Fonofos          | 944-22-9                 | Organophosphate              | Not approved                                      |                                |                                      | IT                                                                                                             |                       |                                        |                                                    |                                          |                                   |
| Malathion        | 121-75-5                 | Organophosphate              | Approved                                          | 01/05/2010                     | 30/04/2023                           | EL, IT                                                                                                         |                       | X                                      |                                                    |                                          | X                                 |
| Parathion methyl | 298-00-0                 | Organophosphate              | Not approved                                      |                                |                                      |                                                                                                                |                       |                                        |                                                    | X                                        |                                   |
| Permethrin       | 52645-53-1               | Pyrethroid                   | Not approved                                      |                                |                                      | IT                                                                                                             | X                     |                                        | X                                                  |                                          | X                                 |
| Phosalone        | 2310-17-0                | Organophosphate              | Not approved                                      |                                |                                      |                                                                                                                |                       |                                        |                                                    |                                          | X                                 |
| Pirimicarb       | 23103-98-2               | Carbamate                    | Approved                                          | 01/02/2007                     | 30/04/2023                           | AT, BE, CZ, DE, DK, EL, ES, FR, HR, HU, IE, IT, LU, NL, PL, PT, SE, SI, SK, UK                                 |                       |                                        | X                                                  |                                          | X                                 |
| Temephos         | 3383-96-8                | Organophosphate              | Not approved                                      |                                |                                      |                                                                                                                |                       |                                        |                                                    |                                          |                                   |
| Terbufos         | 13071-79-9               | Organophosphate              | Not approved                                      |                                |                                      | IT                                                                                                             |                       | X                                      |                                                    | X                                        |                                   |
| Thiacloprid      | 111988-49-9              | Neonicotinoid                | Not approved                                      | 01/01/2005                     | 03/02/2020                           | FI, IE, UK                                                                                                     |                       |                                        |                                                    |                                          | X                                 |

EU countries code glossary: [https://ec.europa.eu/eurostat/statistics-explained/index.php?title=Glossary:Country\\_codes](https://ec.europa.eu/eurostat/statistics-explained/index.php?title=Glossary:Country_codes)

**Table S5.** Information on the individual herbicides (A), insecticides (B) and fungicides (C) analysed in this study (continued)

| (C)             |                          |                              |                                                   |                                |                                      |                                                                                                                |                       |                                        |                                                    |                                          |                                   |
|-----------------|--------------------------|------------------------------|---------------------------------------------------|--------------------------------|--------------------------------------|----------------------------------------------------------------------------------------------------------------|-----------------------|----------------------------------------|----------------------------------------------------|------------------------------------------|-----------------------------------|
| Pesticide       | CAS number <sup>57</sup> | Chemical class <sup>57</sup> | Status under Reg. (EC) No 1107/2009 <sup>75</sup> | Date of approval <sup>75</sup> | Expiration of approval <sup>75</sup> | Countries in which the pesticide is or lately was authorized <sup>75</sup>                                     | Biocide <sup>55</sup> | Used in the top 20 crops <sup>72</sup> | Priority active ingredient in France <sup>73</sup> | Highly hazardous pesticide <sup>74</sup> | High risk pesticide <sup>74</sup> |
| Boscalid        | 188425-85-6              | Carboxamide                  | Approved                                          | 01/08/2008                     | 31/07/2022                           | AT, BE, BG, CY, CZ, DE, DK, EE, EL, ES, FI, FR, HR, HU, IE, IT, LT, LU, LV, MT, NL, PL, PT, RO, SE, SI, SK, UK |                       |                                        | X                                                  |                                          |                                   |
| Carbendazim     | 10605-21-7               | Benzimidazole                | Not approved                                      |                                | 30/11/2014                           |                                                                                                                | X                     |                                        |                                                    | X                                        |                                   |
| Cyprodinil      | 121552-61-2              | Anilinopyrimidine            | Approved                                          | 01/05/2007                     | 30/04/2023                           | AT, BE, BG, CY, CZ, DE, DK, EE, EL, ES, FI, FR, HR, HU, IE, IT, LT, LU, LV, MT, NL, PL, PT, RO, SE, SI, SK, UK |                       |                                        | X                                                  |                                          |                                   |
| Difenoconazole  | 119446-68-3              | Triazole                     | Approved                                          | 01/01/2009                     | 31/12/2022                           | AT, BE, BG, CY, CZ, DE, DK, EE, EL, ES, FI, FR, HR, HU, IE, IT, LU, LV, MT, NL, PL, PT, RO, SE, SI, SK, UK     |                       |                                        | X                                                  |                                          |                                   |
| Dimethomorph    | 110488-70-5              | Morpholine                   | Approved                                          | 01/10/2007                     | 31/07/2022                           | AT, BE, BG, CY, CZ, DE, DK, EE, EL, ES, FI, FR, HR, HU, IE, IT, LU, LV, MT, NL, PL, PT, RO, SE, SI, SK, UK     |                       |                                        |                                                    |                                          |                                   |
| Epoxiconazole   | 133855-98-8              | Triazole                     | Not approved                                      | 01/05/2009                     | 30/04/2020                           | HU, IE, NL, PL, PT, UK                                                                                         |                       |                                        | X                                                  | X                                        |                                   |
| Fenpropidin     | 67306-00-7               | Morpholine                   | Approved                                          | 01/01/2009                     | 31/12/2022                           | AT, BE, BG, CZ, DE, EE, EL, ES, FR, HU, IE, IT, LT, LV, NL, PL, PT, RO, SE, SI, SK, UK                         |                       |                                        | X                                                  |                                          |                                   |
| Fenpropimorph   | 67564-91-4               | Morpholine                   | Not approved                                      | 01/05/2009                     | 30/04/2019                           | IT, NL, UK                                                                                                     | X                     |                                        |                                                    |                                          |                                   |
| Fluazinam       | 79622-59-6               | Phenylpyridinamine           | Approved                                          | 01/03/2009                     | 28/02/2023                           | AT, BE, BG, CY, CZ, DE, DK, EE, EL, ES, FI, FR, HR, HU, IE, IT, LU, LV, MT, NL, PL, PT, RO, SE, SI, SK, UK     |                       |                                        | X                                                  |                                          | X                                 |
| Flusilazole     | 85509-19-9               | Triazole                     | Not approved                                      |                                | 30/06/2008                           |                                                                                                                |                       |                                        |                                                    |                                          |                                   |
| Iprovalicarb    | 140923-17-7              | Carbamate                    | Approved                                          | 01/04/2016                     | 31/03/2031                           | AT, BG, CY, CZ, DE, EL, FR, HR, HU, PT, RO, SI, SK                                                             |                       |                                        |                                                    |                                          |                                   |
| Kresoxim-methyl | 143390-89-0              | Strobilurin                  | Approved                                          | 01/01/2012                     | 31/12/2024                           | AT, BE, BG, CY, CZ, DE, DK, EE, EL, ES, FI, FR, HR, HU, IE, IT, LU, LV, NL, PL, PT, RO, SE, SI, SK, UK         |                       |                                        |                                                    |                                          |                                   |
| Metalaxyl       | 57837-19-1               | Phenylamide                  | Approved                                          | 01/07/2010                     | 30/06/2023                           | AT, BE, BG, CY, CZ, DE, EL, ES, FR, HR, HU, IT, MT, PL, PT, RO, SI, SK                                         |                       |                                        |                                                    |                                          | X                                 |

**Table S5.** Information on the individual herbicides (A), insecticides (B) and fungicides (C) analysed in this study (Continued)

| (C)<br>Pesticide | CAS number <sup>57</sup> | Chemical class <sup>57</sup> | Status under Reg. (EC) No 1107/2009 <sup>75</sup> | Date of approval <sup>75</sup> | Expiration of approval <sup>75</sup> | Countries in which the pesticide is or lately was authorized <sup>75</sup>                                     | Biocide <sup>55</sup> | Used in the top 20 crops <sup>72</sup> | Priority active ingredient in France <sup>73</sup> | Highly hazardous pesticide <sup>74</sup> | High risk pesticide <sup>74</sup> |
|------------------|--------------------------|------------------------------|---------------------------------------------------|--------------------------------|--------------------------------------|----------------------------------------------------------------------------------------------------------------|-----------------------|----------------------------------------|----------------------------------------------------|------------------------------------------|-----------------------------------|
| Prochloraz       | 67747-09-5               | Imidazole                    | Not approved                                      | 01/01/2012                     | 31/12/2021                           | BE, CY, CZ, EL, HR, HU, IE, LT, MT, PT, UK                                                                     |                       |                                        | X                                                  |                                          |                                   |
| Propiconazole    | 60207-90-1               | Triazole                     | Not approved                                      | 01/06/2004                     | 19/12/2018                           | UK                                                                                                             | X                     | X                                      |                                                    | X                                        |                                   |
| Pyrimethanil     | 53112-28-0               | Anilinopyrimidine            | Approved                                          | 01/06/2007                     | 30/04/2023                           | AT, BE, BG, CY, CZ, DE, DK, EL, ES, FI, FR, HR, HU, IE, LT, LU, MT, NL, PL, PT, RO, SE, SI, SK, UK             |                       |                                        | X                                                  |                                          |                                   |
| Spiroxamine      | 118134-30-8              | Morpholine                   | Approved                                          | 01/01/2012                     | 31/12/2023                           | AT, BE, BG, CY, CZ, DE, DK, EE, EL, ES, FI, FR, HR, HU, IE, LT, LU, LV, PL, PT, RO, SE, SI, SK, UK             |                       |                                        | X                                                  |                                          |                                   |
| Tebuconazole     | 107534-96-3              | Triazole                     | Approved                                          | 01/09/2009                     | 31/08/2022                           | AT, BE, BG, CY, CZ, DE, DK, EE, EL, ES, FI, FR, HR, HU, IE, IT, LT, LU, LV, MT, NL, PL, PT, RO, SE, SI, SK, UK | X                     | X                                      | X                                                  |                                          |                                   |
| Tetraconazole    | 112281-77-3              | Triazole                     | Approved                                          | 01/01/2010                     | 31/12/2022                           | AT, BE, BG, CY, CZ, DE, EL, ES, FR, HR, HU, LT, MT, PL, PT, RO, SI, SK, UK                                     |                       |                                        |                                                    |                                          | X                                 |

EU countries code glossary: [https://ec.europa.eu/eurostat/statistics-explained/index.php?title=Glossary:Country\\_codes](https://ec.europa.eu/eurostat/statistics-explained/index.php?title=Glossary:Country_codes)

**Table S6.** Concentrations of individual pesticides (in  $\text{pg m}^{-3}$ ) observed in field blanks (FB, QFFs) for the rural (A), coastal (B), mountain and polar (C) sites. The average sampled volume at each site was used to estimate the concentrations. The cells in blue and orange represent results lower than the instrumental limit of detection (iLOD) and the instrumental limit of quantifications (iLOQ), respectively.

(A)

| Analytes                | FB-AMO | FB-BKO | FB-BRM | FB-CBW | FB-CRA | FB-DBG | FB-HTM | FB-HYY | FB-KOS | FB-MEL | FB-MSY | FB-OPE | FB-PAY | FB-RIG | FB-SME | FB-THK |
|-------------------------|--------|--------|--------|--------|--------|--------|--------|--------|--------|--------|--------|--------|--------|--------|--------|--------|
| <b>2,4-D</b>            | <iLOQ  | <iLOD  | 0.3    | <iLOD  | <iLOQ  | <iLOQ  | <iLOD  | <iLOD  | <iLOD  | <iLOD  | <iLOQ  | <iLOQ  | 0.2    | 0.2    | <iLOD  | <iLOD  |
| <b>Carbendazim</b>      | 13.7   | 0.9    | <iLOD  | 7      | 0.2    | 0.4    | 0.1    | 3.7    | 4.3    | 0.1    | 0.2    | 0.6    | 0.4    | 0.2    | 2.7    | 1.9    |
| <b>Carbofuran</b>       | <iLOD  | <iLOD  | <iLOQ  | <iLOD  | <iLOD  | <iLOD  | <iLOD  | <iLOD  | <iLOD  | <iLOD  | <iLOD  | <iLOD  | <iLOQ  | <iLOD  | <iLOD  | <iLOD  |
| <b>Chlorpyrifos</b>     | 2.5    | <iLOQ  | 0.8    | 0.6    | <0.1   | <0.1   | <iLOD  | 1.9    | 0.7    | 0.1    | <0.1   | 0.1    | 0.3    | <iLOD  | <iLOQ  | <iLOD  |
| <b>Cyprodinil</b>       | <iLOD  | <iLOD  | <iLOD  | <iLOD  | <iLOD  | <iLOD  | <iLOQ  | <iLOQ  | <iLOD  | <iLOD  | 0.4    | <iLOD  | <iLOD  | <iLOD  | <iLOD  | <iLOQ  |
| <b>Fenpropidin</b>      | <iLOD  | <iLOD  | <iLOD  | <iLOD  | <iLOD  | <iLOD  | <iLOQ  | <iLOQ  | <iLOD  | <iLOD  | 0.3    | <iLOD  | <iLOD  | <iLOD  | <iLOD  | <iLOD  |
| <b>Fenpropimorph</b>    | <iLOD  | 0.2    | <iLOD  | <iLOD  | <iLOD  | 0.1    | <iLOD  | <iLOD  | <iLOD  | <iLOD  | <iLOQ  | <iLOD  | <iLOD  | <iLOD  | <iLOD  | <iLOD  |
| <b>Iprovalicarb</b>     | <iLOD  | <iLOD  | 9.5    | <iLOD  | <iLOD  | <iLOD  | <iLOD  | <iLOD  | <iLOD  | <iLOD  | <iLOD  | <iLOD  | 9.2    | <iLOD  | <iLOD  | <iLOD  |
| <b>Mecoprop</b>         | <iLOD  | <iLOD  | 0.3    | <iLOD  | <iLOD  | <iLOD  | <iLOD  | <iLOD  | <iLOD  | <iLOD  | 0.1    | <iLOD  | 0.6    | <iLOD  | <iLOD  | <iLOD  |
| <b>Pendimethalin</b>    | 1.7    | <iLOQ  | 1.9    | <iLOQ  | <0.1   | 0.1    | <0.1   | 1.2    | 1.8    | 0.9    | 0.1    | 0.1    | 0.8    | 0.4    | 1.1    | <iLOQ  |
| <b>Phosalone</b>        | <iLOD  | <iLOQ  | <iLOD  | <iLOD  | <iLOQ  | <iLOD  | <iLOD  | <iLOD  | <iLOD  | <iLOQ  | <iLOD  | <iLOD  | <iLOD  | <iLOD  | <iLOD  | <iLOD  |
| <b>Prochloraz</b>       | <iLOD  | <iLOQ  | <iLOD  | <iLOD  | <iLOD  | <iLOD  | <iLOD  | <iLOD  | <iLOD  | <iLOD  | <iLOD  | <iLOD  | <iLOD  | <iLOD  | <iLOD  | <iLOD  |
| <b>Propiconazole</b>    | <iLOD  | <iLOD  | <iLOD  | <iLOD  | <iLOD  | <iLOD  | <iLOD  | <iLOD  | <iLOD  | <iLOD  | <iLOD  | <iLOD  | <iLOD  | <iLOD  | <iLOQ  | <iLOD  |
| <b>Prosulfocarb</b>     | <iLOQ  | <iLOD  | 1.1    | <iLOD  | <iLOQ  | <iLOD  | <iLOD  | <iLOD  | 2.5    | 0.2    | <iLOD  | <iLOD  | 0.5    | 0.6    | <iLOD  | <iLOD  |
| <b>Quizalofop ethyl</b> | <iLOQ  | <iLOD  | <iLOD  | <iLOD  | <iLOD  | <iLOD  | <iLOD  | <iLOD  | <iLOD  | <iLOD  | <iLOD  | <iLOQ  | <iLOD  | <iLOD  | <iLOD  | <iLOD  |
| <b>S-Metolachlor</b>    | <iLOD  | <iLOD  | 3.3    | <iLOD  | <iLOD  | <iLOD  | <iLOD  | <iLOD  | <iLOD  | <iLOD  | <iLOD  | <iLOD  | 7.4    | 1.9    | <iLOD  | <iLOD  |
| <b>Tebuconazole</b>     | <iLOD  | <iLOD  | <iLOD  | <iLOQ  | <0.1   | <0.1   | <iLOD  | <iLOD  | <iLOD  | <iLOD  | <0.1   | <0.1   | <iLOD  | <iLOD  | 1.1    | <iLOQ  |
| <b>Terbutylazine</b>    | <iLOD  | <iLOD  | 1.7    | <iLOD  | <iLOD  | <iLOQ  | <iLOD  | <iLOD  | 0.5    | 0.3    | <0.1   | <iLOD  | 1.8    | 0.5    | <iLOD  | <iLOD  |

(B)

| Analytes              | FB-ARN | FB-FKL | FB-MHD | FB-WEY |
|-----------------------|--------|--------|--------|--------|
| <b>2,4-D</b>          | 0.1    | 0.1    | 0.3    | 0.4    |
| <b>Acetochlor</b>     | <iLOD  | <iLOD  | <iLOD  | 0.7    |
| <b>Carbendazim</b>    | 0.5    | 0.2    | 0.1    | 0.2    |
| <b>Chlorpyrifos</b>   | <iLOQ  | 0.1    | 0.1    | <iLOD  |
| <b>Fenpropimorph</b>  | <iLOD  | <iLOD  | <0.1   | 0.2    |
| <b>Mecoprop</b>       | <iLOD  | <iLOD  | 0.2    | 0.1    |
| <b>Metalaxyl</b>      | <iLOD  | <iLOD  | <iLOD  | <iLOQ  |
| <b>Metazachlor</b>    | <iLOD  | <iLOD  | <iLOD  | <0.1   |
| <b>Oxadiazon</b>      | <iLOD  | <iLOD  | <iLOQ  | <iLOQ  |
| <b>Pendimethalin</b>  | 0.1    | 0.1    | <0.1   | 0.1    |
| <b>Pirimicarb</b>     | <iLOD  | <iLOD  | <0.1   | <0.1   |
| <b>Propiconazole</b>  | <iLOD  | <iLOD  | <iLOQ  | 0.3    |
| <b>Prosulfocarb</b>   | <iLOD  | 0.2    | 0.8    | 1.1    |
| <b>S-Metolachlor</b>  | <iLOD  | <iLOD  | <iLOD  | 0.3    |
| <b>Tebuconazole</b>   | <iLOQ  | <iLOQ  | <0.1   | <0.1   |
| <b>Terbuthylazine</b> | <iLOD  | <iLOD  | <0.1   | 0.1    |
| <b>Thiacloprid</b>    | <iLOD  | <iLOD  | <iLOD  | <iLOQ  |



(C)

| Analytes                | FB-ADA | FB-CPK | FB-HAC | FB-JFJ | FB-PAL | FB-PDM | FB-SBO | FB-UFS | FB-ZPO |
|-------------------------|--------|--------|--------|--------|--------|--------|--------|--------|--------|
| <b>2,4-D</b>            | <iLOD  | <iLOQ  | <iLOQ  | <iLOD  | <iLOQ  | <iLOD  | <iLOD  | <iLOD  | <iLOD  |
| <b>Acetochlor</b>       | <iLOD  | <iLOD  | <iLOQ  | <iLOD  | <iLOD  | <iLOD  | 1.3    | <iLOD  | <iLOD  |
| <b>Carbendazim</b>      | 0.6    | 19.2   | 0.5    | 0.6    | 4.7    | 1.3    | 5.7    | 0.7    | 4.0    |
| <b>Carbofuran</b>       | <iLOD  | <iLOD  | <iLOD  | <iLOD  | <iLOD  | <iLOD  | <iLOD  | <iLOD  | <iLOD  |
| <b>Chlorpyrifos</b>     | 0.0    | 3.2    | 3.6    | 0.1    | <iLOQ  | <iLOQ  | 0.3    | <iLOQ  | <iLOQ  |
| <b>Cyprodinil</b>       | <iLOD  | <iLOD  | <iLOD  | <iLOD  | <iLOD  | <iLOQ  | <iLOD  | <iLOD  | <iLOD  |
| <b>Fenpropidin</b>      | <iLOD  | <iLOD  | <iLOQ  | <iLOD  | <iLOD  | <iLOD  | <iLOD  | <iLOD  | <iLOD  |
| <b>Fenpropimorph</b>    | <iLOD  | <iLOD  | <iLOD  | <iLOD  | <iLOD  | <iLOD  | <iLOD  | <iLOD  | 0.1    |
| <b>Iprovalicarb</b>     | <iLOD  | <iLOD  | <iLOD  | <iLOD  | <iLOD  | <iLOD  | 24.5   | <iLOD  | <iLOD  |
| <b>Mecoprop</b>         | <iLOD  | <iLOD  | <iLOD  | <iLOD  | <iLOD  | <iLOD  | <iLOD  | <iLOD  | <iLOD  |
| <b>Metalaxyl</b>        | <iLOD  | <iLOD  | <iLOD  | <iLOD  | <iLOD  | <iLOD  | <iLOD  | <iLOD  | <iLOD  |
| <b>Metazachlor</b>      | <iLOD  | <iLOD  | <iLOD  | <iLOD  | <iLOD  | <iLOD  | <iLOD  | <iLOD  | <iLOD  |
| <b>Oxadiazon</b>        | <iLOD  | <iLOD  | <iLOD  | <iLOD  | <iLOD  | <iLOD  | <iLOQ  | <iLOD  | <iLOD  |
| <b>Pendimethalin</b>    | 0.1    | 1.9    | 0.9    | 1.3    | <iLOQ  | <iLOQ  | 0.5    | <iLOQ  | 0.2    |
| <b>Phosalone</b>        | <iLOD  | <iLOD  | <iLOD  | <iLOD  | <iLOD  | <iLOD  | <iLOD  | <iLOD  | <iLOD  |
| <b>Pirimicarb</b>       | <iLOD  | <iLOD  | <iLOD  | <iLOD  | <iLOD  | <iLOD  | <iLOD  | <iLOD  | <iLOD  |
| <b>Prochloraz</b>       | <iLOD  | <iLOD  | <iLOD  | <iLOD  | <iLOD  | <iLOD  | <iLOD  | <iLOD  | <iLOD  |
| <b>Propiconazole</b>    | <iLOD  | <iLOD  | <iLOD  | <iLOD  | <iLOD  | <iLOD  | <iLOQ  | <iLOD  | <iLOD  |
| <b>Prosulfocarb</b>     | <iLOD  | <iLOD  | <iLOQ  | <iLOQ  | 5.5    | <iLOD  | <iLOQ  | <iLOQ  | <iLOD  |
| <b>Quinalofop ethyl</b> | <iLOD  | <iLOD  | <iLOD  | <iLOD  | <iLOD  | <iLOD  | <iLOD  | <iLOD  | <iLOD  |
| <b>S-Metolachlor</b>    | <iLOD  | <iLOD  | <iLOD  | <iLOD  | <iLOD  | <iLOD  | <iLOD  | <iLOD  | <iLOD  |
| <b>Tebuconazole</b>     | <iLOD  | <iLOD  | <iLOD  | <iLOD  | <iLOD  | <iLOD  | <iLOD  | <iLOD  | <iLOD  |
| <b>Terbuthylazine</b>   | <iLOD  | <iLOD  | <iLOD  | <iLOD  | <iLOD  | <iLOD  | <iLOD  | 0.0    | <iLOD  |
| <b>Thiacloprid</b>      | <iLOD  | <iLOD  | <iLOD  | <iLOD  | <iLOD  | <iLOD  | <iLOD  | <iLOD  | <iLOD  |

**Table S7.** Concentrations of individual pesticides (in  $\text{pg m}^{-3}$ ) observed in field blanks (FB, PUF-XAD2-PUF sandwiches) at all sites. The average sampled volume at each site was used to estimate the concentrations. The cells in blue and orange represent results lower than the instrumental limit of detection (iLOD) and the instrumental limit of quantifications (iLOQ), respectively.

| Analytes               | FB-ADA | FB-BKO | FB-KOS | FB-SBO | FB-UFS | FB-ZPO |
|------------------------|--------|--------|--------|--------|--------|--------|
| <b>2,4-D</b>           | 0.2    | 0.1    | <iLOD  | 0.6    | 0.4    | 0.2    |
| <b>Carbendazim</b>     | 1.2    | 2.4    | 24.4   | 9.5    | 6.1    | 1.5    |
| <b>Carbofuran</b>      | <iLOD  | <iLOD  | <iLOD  | <iLOD  | <iLOQ  | <iLOD  |
| <b>Chlorpyrifos</b>    | 1.1    | 2.3    | 4.3    | 3.2    | 1.9    | 2.7    |
| <b>Diuron</b>          | <iLOD  | <iLOD  | <iLOQ  | <iLOD  | <iLOD  | <iLOD  |
| <b>Fenpropimorph</b>   | <iLOD  | <iLOD  | <iLOD  | 11.5   | <iLOQ  | <iLOD  |
| <b>Iprovalicarb</b>    | 2.5    | 8.2    | <iLOD  | 13.7   | 29.7   | <iLOD  |
| <b>Kresoxim-methyl</b> | <iLOD  | <iLOD  | <iLOD  | <iLOD  | <iLOD  | <iLOQ  |
| <b>Mecoprop</b>        | <iLOD  | <iLOD  | <iLOD  | 1.9    | 0.3    | 0.1    |
| <b>Metazachlor</b>     | 0.1    | <iLOD  | 1.0    | 0.9    | 0.3    | 0.2    |
| <b>Pendimethalin</b>   | 0.1    | 0.6    | <iLOQ  | 0.5    | 0.3    | 1.0    |
| <b>Phosalone</b>       | <iLOD  | 0.8    | <iLOD  | <iLOD  | <iLOD  | <iLOQ  |
| <b>Propiconazole</b>   | 0.3    | 0.4    | <iLOD  | 1.4    | 1.0    | 0.4    |
| <b>Prosulfocarb</b>    | <iLOD  | <iLOD  | <iLOD  | 1.0    | 2.0    | <iLOD  |
| <b>S-Metolachlor</b>   | <iLOD  | <iLOD  | <iLOD  | 5.1    | <iLOD  | <iLOD  |
| <b>Tebuconazole</b>    | <0.1   | <iLOD  | <iLOD  | 0.8    | 0.3    | 0.0    |
| <b>Terbuthylazine</b>  | <iLOD  | <iLOD  | 0.8    | <iLOD  | <iLOD  | <iLOD  |

**Table S8.** Origin of air samples collected at mountain sites

FT = free troposphere, PBL = planetary boundary layer

| <b>Sites</b> | <b>Sampling period: dates</b> | <b>Air collected</b> |
|--------------|-------------------------------|----------------------|
| CPK          | 1: 28-30/04/2020              | Mixed PBL and FT     |
|              | 2: 12-14/05/2020              | Mixed PBL and FT     |
| HAC          | 2: 12-14/05/2020              | <b>FT</b>            |
|              | 3: 26-28/05/2020              | Mixed PBL and FT     |
| JFJ          | 1: 28-30/04/2020              | Mixed PBL and FT     |
|              | 2: 12-14/05/2020              | Mixed PBL and FT     |
|              | 3: 26-28/05/2020              | Mixed PBL and FT     |
| PDM          | 3: 26-28/05/2020              | Mixed PBL and FT     |
| SBO          | 2: 12-14/05/2020              | <b>FT</b>            |
|              | 3: 26-28/05/2020              | <b>FT</b>            |
| UFS          | 1: 28-30/04/2020              | Mixed PBL and FT     |
|              | 2: 12-14/05/2020              | Mixed PBL and FT     |
|              | 3: 26-28/05/2020              | <b>FT</b>            |

**Table S9.** Quantification frequency (QF, in %) per site of individual pesticides present in the particulate phase

| Analyte       | QF   | Analyte         | QF   | Analyte         | QF   | Analyte          | QF   |
|---------------|------|-----------------|------|-----------------|------|------------------|------|
| Tebuconazole  | 82.8 | Prochloraz      | 34.5 | Simazine        | 13.8 | Quizalofop ethyl | 3.45 |
| Spiroxamine   | 79.3 | Acetamiprid     | 27.6 | Triallate       | 13.8 | Alachlor         | 0    |
| Cyprodinil    | 65.5 | Aclonifen       | 27.6 | Dimethomorph    | 10.3 | Azinphos methyl  | 0    |
| Fenpropidin   | 65.5 | Metamitron      | 27.6 | Iprovalicarb    | 10.3 | Chloridazon      | 0    |
| Fenpropimorph | 65.5 | Carbendazim     | 24.1 | Oxadiazon       | 10.3 | Chlorsulfuron    | 0    |
| Metazachlor   | 65.5 | Diuron          | 24.1 | Tetraconazole   | 10.3 | Cypermethrin     | 0    |
| Terbutylazine | 65.5 | Mecoprop        | 24.1 | Chlorpyrifos    | 6.90 | Diclofop-methyl  | 0    |
| 2,4-D         | 62.1 | Chlorotoluron   | 20.7 | Clomazone       | 6.90 | Disulfoton       | 0    |
| S-Metolachlor | 55.2 | Dimethachlor    | 20.7 | Difenoconazole  | 6.90 | Esbiothrin       | 0    |
| Thiacloprid   | 55.2 | Dimethoate      | 20.7 | Lenacil         | 6.90 | Fipronil         | 0    |
| Atrazine      | 51.7 | Epoxiconazole   | 20.7 | Permethrin      | 6.90 | Fluazinam        | 0    |
| Boscalid      | 48.3 | Acetochlor      | 17.2 | Phosalone       | 6.90 | Flusilazole      | 0    |
| Pendimethalin | 48.3 | Dimethenamid-P  | 17.2 | Pyrimethanil    | 6.90 | Fonofos          | 0    |
| Propiconazole | 48.3 | Fenoxycarb      | 17.2 | 2,4-MCPA        | 3.45 | Linuron          | 0    |
| Prosulfocarb  | 44.8 | Fluroxypyr      | 17.2 | Carbofuran      | 3.45 | Malathion        | 0    |
| Carbaryl      | 41.4 | Kresoxim-methyl | 17.2 | Chlorpropham    | 3.45 | Parathion methyl | 0    |
| Metalaxyl     | 37.9 | Diazinon        | 13.8 | Fenitrothion    | 3.45 | Sulcotrione      | 0    |
| Isoproturon   | 34.5 | Diflufenican    | 13.8 | Flumioxazine    | 3.45 | Temephos         | 0    |
| Pirimicarb    | 34.5 | Metribuzin      | 13.8 | Flurochloridone | 3.45 | Terbufos         | 0    |

**Table S10.** Summary of pesticides previously quantified in the atmosphere of polar sites.

| <b>Pesticides</b>        | <b>CAS number</b> | <b>Type of sampler used</b> | <b>Quantified in:</b>          | <b>Ref. :</b> |
|--------------------------|-------------------|-----------------------------|--------------------------------|---------------|
| 2,6-Dichlorobenzonitrile | 1194-65-6         | Active sampling             | Gaseous phase                  | (24)          |
| Alachlor                 | 15972-60-8        | Active sampling             | Total                          | (22)          |
| Atrazine                 | 1912-24-9         | Active sampling             | Total                          | (22)          |
| Chlorobenzilate          | 510-15-6          | Active sampling             | Total                          | (22)          |
| Chloroneb                | 2675-77-6         | Active sampling             | Total                          | (22)          |
|                          |                   | Active sampling             | Gaseous phase                  | (24)          |
| Chlorothalonil           | 1897-45-6         | Active sampling             | Total                          | (23)          |
| Chlorpyrifos             | 2921-88-2         | Active sampling             | Total                          | (23)          |
| Dacthal                  | 1861-32-1         | Active sampling             | Total                          | (23)          |
| Dichlofluanid            | 1085-98-9         | Active sampling             | Gaseous and particulate phases | (24)          |
| Dicofol                  | 115-32-2          | Active sampling             | Gaseous phase                  | (23)          |
| Endosulfan               | 115-29-7          | Active sampling             | Total                          | (23)          |
| MCPA                     | 94-74-6           | Passive sampling            |                                | (23)          |
| Methoxychlor             | 72-43-5           | Active sampling             | Total                          | (23)          |
| Metribuzin               | 21087-64-9        | Active sampling             | Total                          | (23)          |
| Nitrapyrin               | 1929-82-4         | Active sampling             | Gaseous phase                  | (24)          |
| Pendimethalin            | 40487-42-1        | Active sampling             | Total                          | (23)          |
| Pentachloro-nitrobenzene | 82-68-8           | Active sampling             | Total                          | (23)          |
| Permethrin               | 52645-53-1        | Active sampling             | Total                          | (22)          |
| Phosalone                | 2310-17-0         | Active sampling             | Total                          | (23)          |
| Quizalofop-ethyl         | 76578-14-8        | Active sampling             | Total                          | (23)          |
| Simazine                 | 122-34-9          | Active sampling             | Total                          | (22)          |
| Tefluthrin               | 79538-32-2        | Active sampling             | Total                          | (23)          |
|                          |                   | Passive sampling            |                                | (23)          |
| Triallate                | 2303-17-5         | Active sampling             | Gaseous and particulate phases | (24)          |
| Trifluralin              | 1582-09-8         | Active sampling             | Total                          | (23)          |

Total = the gaseous and particulate phases were extracted together, therefore no distinction can be made

**Table S11.** Physico-chemical properties and half-lives in different environmental matrices of the individual herbicides (A), insecticides (B) and fungicides (C) analysed in this study

(A)

| Pesticide        | Half-life in air (hours, 25°C) <sup>36</sup> | Half-life in soil (days) <sup>57</sup> | Half-life in water at pH = 7 (days) <sup>57</sup> | log K <sub>OA</sub> (25°C) (est.) <sup>36</sup> | Saturation vapor pressure (25°C, Pa, est.) <sup>36</sup> | Saturation vapor pressure (Pa, exp.) <sup>36</sup> | Characteristic travel distance (CTD, km) <sup>a</sup> |     |
|------------------|----------------------------------------------|----------------------------------------|---------------------------------------------------|-------------------------------------------------|----------------------------------------------------------|----------------------------------------------------|-------------------------------------------------------|-----|
| 2,4-D            | 19.35                                        | 28.8                                   | 7.7                                               | 8.65                                            | 3.7E-03                                                  | 1.1E-02                                            | b                                                     | 286 |
| 2,4-MCPA         | 10.166                                       | 25                                     | 13.5                                              | 10.51                                           | 6.0E-02                                                  | 7.9E-04                                            | c                                                     | 49  |
| Acetochlor       | 2.589                                        | 12.1                                   | 40.5                                              | 9.41                                            | 3.7E-03                                                  | N.A.                                               |                                                       | 101 |
| Aclonifen        | 10.1                                         | 80.4                                   | 197                                               | 10.84                                           | 3.3E-04                                                  | 1.6E-05                                            | c                                                     | 486 |
| Alachlor         | 2.847                                        | 14                                     | 2                                                 | 9.99                                            | 2.7E-03                                                  | N.A.                                               |                                                       | 53  |
| Atrazine         | 4.693                                        | 29                                     | 80                                                | 9.63                                            | 3.8E-03                                                  | 3.9E-05                                            | c                                                     | 199 |
| Chloridazon      | 3.192                                        | 18.6                                   | 51.5                                              | 9.01                                            | 3.9E-05                                                  | 6.0E-05                                            | b                                                     | 128 |
| Chlorotoluron    | 3.288                                        | 12.5                                   | 44.4                                              | 10.64                                           | 1.8E-03                                                  | 4.8E-06                                            | b                                                     | 110 |
| Chlorpropham     | 3.25                                         | 13.1                                   | 60                                                | 8.14                                            | 4.5E-01                                                  | 2.4E-02                                            | b                                                     | 149 |
| Chlorsulfuron    | 50.3945                                      | 36.2                                   | 21                                                | 15.85                                           | 1.6E-08                                                  | 3.0E-09                                            | c                                                     | 52  |
| Clomazone        | 5.839                                        | 27.3                                   | 54                                                | 8.27                                            | 9.4E-01                                                  | 1.9E+00                                            | c                                                     | 134 |
| Diclofop-methyl  | 6.763                                        | 19                                     | 0.06                                              | 8.71                                            | 9.2E-04                                                  | 4.7E-04                                            | c                                                     | 150 |
| Diflufenican     | 40.158                                       | 64.6                                   | 175                                               | 9.78                                            | 5.4E-07                                                  | 4.2E-06                                            | c                                                     | 682 |
| Dimethachlor     | 3.174                                        | 3.2                                    | 15.7                                              | 9.34                                            | 5.8E-02                                                  | 1.5E-03                                            | c                                                     | 39  |
| Dimethenamid-P   | 2.452                                        | 15.8                                   | 24                                                | 7.62                                            | 8.1E-03                                                  | 3.7E-02                                            | c                                                     | 60  |
| Diuron           | 11.801                                       | 229                                    | 8.8                                               | 10.37                                           | 6.2E-04                                                  | 9.2E-06                                            | c                                                     | 22  |
| Flumioxazin      | 2.26                                         | 17.6                                   | 4                                                 | 7.14                                            | 2.4E-10                                                  | 3.2E-04                                            | d                                                     | 10  |
| Flurochloridone  | 17.183                                       | 40.6                                   | 6.55                                              | 9.16                                            | 2.2E-03                                                  | 4.4E-04                                            | c                                                     | 269 |
| Fluroxypyr       | 4.449                                        | 3                                      | 10.5                                              | 12.54                                           | 2.6E-05                                                  | 3.8E-08                                            | b                                                     | 26  |
| Isoproturon      | 2.303                                        | 23                                     | 40                                                | 11.21                                           | 1.1E-03                                                  | 3.3E-06                                            | c                                                     | 100 |
| Lenacil          | 2.756                                        | 39.8                                   | 91                                                | 11.59                                           | 4.0E-08                                                  | 2.0E-07                                            | c                                                     | 226 |
| Linuron          | 12.409                                       | 48                                     | 13                                                | 9.79                                            | 1.6E-03                                                  | 1.9E-04                                            | c                                                     | 123 |
| Mecoprop         | 7.378                                        | N.A.                                   | 37                                                | 10.64                                           | 6.1E-02                                                  | N.A.                                               |                                                       | 92  |
| Metamitron       | 6.595                                        | 11.1                                   | 10.5                                              | 11.24                                           | 9.9E-05                                                  | 8.6E-07                                            | b                                                     | 26  |
| Metazachlor      | 2.174                                        | 6.8                                    | 216                                               | 9.77                                            | 1.5E-04                                                  | N.A.                                               |                                                       | 534 |
| Metribuzin       | 7.028                                        | 19                                     | 41                                                | 10.02                                           | 6.9E-04                                                  | 5.8E-05                                            | b                                                     | 102 |
| Oxadiazon        | 5.272                                        | 165                                    | 17.9                                              | 10.33                                           | 4.5E-05                                                  | 1.5E-05                                            | d                                                     | 120 |
| Pendimethalin    | 4.223                                        | 100.6                                  | 4                                                 | 9.64                                            | 2.7E-02                                                  | 4.0E-03                                            | c                                                     | 10  |
| Prosulfocarb     | 3.934                                        | 9.8                                    | 0.94                                              | 10.93                                           | 6.4E-03                                                  | 6.9E-05                                            | c                                                     | 115 |
| Quizalofop ethyl | 4.513                                        | 60                                     | 39                                                | 10.64                                           | 5.9E-06                                                  | 8.7E-07                                            | b                                                     | 100 |
| Simazine         | 7.201                                        | 90                                     | 46                                                | 9.59                                            | 1.2E-03                                                  | 3.0E-06                                            | c                                                     | 114 |
| S-Metolachlor    | 2.296                                        | 0.9654167                              | 9                                                 | 9.33                                            | 6.7E-01                                                  | N.A.                                               |                                                       | 42  |
| Sulcotrione      | 17.085                                       | 0.15                                   | 9.5                                               | 10.71                                           | 1.2E-06                                                  | 5.0E-06                                            | c                                                     | 24  |
| Terbuthylazine   | 13.549                                       | 21.8                                   | 6                                                 | 9.03                                            | 2.2E-03                                                  | 1.5E-04                                            | c                                                     | 222 |
| Triallate        | 3.851                                        | 46                                     | 104                                               | 7.91                                            | 2.4E-02                                                  | 1.6E-02                                            | c                                                     | 176 |

<sup>a</sup> using the OECD screening tool for LRT<sup>65</sup> input data as listed with estimated values for log K<sub>OW</sub> and log K<sub>AW</sub><sup>36</sup>; using a global annual mean OH concentration of 0.75×10<sup>6</sup> cm<sup>-3</sup><sup>36</sup>; using experimental values for half-lives in soil. <sup>b</sup> T = 293 K; <sup>c</sup> T = 298 K; <sup>d</sup> T = 295 K; N.A. = not applicable

(B)

| Pesticide        | Half-life in air (hours, 25°C) <sup>36</sup> | Half-life in soil (days) <sup>57</sup> | Half-life in water at pH = 7 (days) <sup>57</sup> | log K <sub>OA</sub> (25°C) (est.) <sup>36</sup> | Saturation vapor pressure (25°C, Pa, est.) <sup>36</sup> | Saturation vapor pressure (Pa, exp.) <sup>36</sup> | Characteristic travel distance (CTD, km) <sup>a</sup> |
|------------------|----------------------------------------------|----------------------------------------|---------------------------------------------------|-------------------------------------------------|----------------------------------------------------------|----------------------------------------------------|-------------------------------------------------------|
| Acetamiprid      | 1.679                                        | 3                                      | 4.7                                               | 8.1                                             | 5.81E-03                                                 | N.A.                                               | 34                                                    |
| Azinphos methyl  | 0.842                                        | N.A.                                   | 8                                                 | 11.38                                           | 1.02E-05                                                 | N.A.                                               | 20                                                    |
| Carbaryl         | 4.937                                        | N.A.                                   | 3.1                                               | 9.23                                            | 7.11E-03                                                 | 1.81E-04                                           | <sup>b</sup> 62                                       |
| Carbofuran       | 4.935                                        | 14                                     | 6.1                                               | 9.22                                            | 7.38E-03                                                 | 6.47E-04                                           | <sup>c</sup> 54                                       |
| Chlorpyrifos     | 1.4                                          | 27.6                                   | 5                                                 | 8.88                                            | 2.73E-03                                                 | 2.71E-03                                           | <sup>b</sup> 29                                       |
| Cypermethrin     | 5.99                                         | 0.9125                                 | 3                                                 | 11.71                                           | 1.74E-05                                                 | 4.09E-07                                           | <sup>b</sup> 183                                      |
| Diazinon         | 1.328                                        | 18.4                                   | 4.3                                               | 9.15                                            | 7.24E-03                                                 | 1.20E-02                                           | <sup>b</sup> 28                                       |
| Dimethoate       | 1.625                                        | 7.2                                    | 12.6                                              | 8.78                                            | 5.50E-03                                                 | 2.51E-03                                           | <sup>b</sup> 31                                       |
| Disulfoton       | 0.963                                        | N.A.                                   | 15                                                | 8.07                                            | 4.66E-02                                                 | 1.30E-02                                           | <sup>b</sup> 37                                       |
| Esbiothrine      | 0.578                                        | 32                                     | N.A.                                              | 10.15                                           | 4.70E-03                                                 | 1.60E-04                                           | <sup>d</sup> N.A.                                     |
| Fenitrothion     | 2.143                                        | N.A.                                   | 1.1                                               | 7.72                                            | 1.02E-02                                                 | 7.20E-03                                           | <sup>e</sup> 44                                       |
| Fenoxycarb       | 1.966                                        | 5.94                                   | 4.13                                              | 12.06                                           | 5.90E-04                                                 | 8.67E-07                                           | <sup>b</sup> 116                                      |
| Fipronil         | 1.336                                        | 65                                     | 54                                                | 11.46                                           | 1.51E-07                                                 | 3.71E-07                                           | <sup>b</sup> 134                                      |
| Fonofos          | 1.493                                        | 40                                     | 277.5                                             | 7.49                                            | 7.34E-02                                                 | 4.51E-02                                           | <sup>b</sup> 420                                      |
| Malathion        | 1.658                                        | 1                                      | 0.4                                               | 9.06                                            | 3.28E-02                                                 | 4.51E-04                                           | <sup>b</sup> 29                                       |
| Parathion methyl | 2.174                                        | 10                                     | 15                                                | 8.25                                            | 1.55E-02                                                 | 4.67E-04                                           | <sup>b</sup> 44                                       |
| Permethrin       | 5.609                                        | 42                                     | 23                                                | 10.62                                           | 1.10E-04                                                 | 2.91E-06                                           | <sup>b</sup> 151                                      |
| Phosalone        | 0.408                                        | N.A.                                   | 2.8                                               | 9.17                                            | 1.55E-05                                                 | N.A.                                               | 9                                                     |
| Pirimicarb       | 0.847                                        | 9                                      | 29.6                                              | 9.16                                            | 1.50E-02                                                 | 9.71E-04                                           | <sup>b</sup> 74                                       |
| Temephos         | 0.946                                        | N.A.                                   | 17.2                                              | 13.06                                           | 1.05E-05                                                 | N.A.                                               | 980                                                   |
| Terbufos         | 0.528                                        | 12                                     | 16                                                | 7.49                                            | 4.66E-02                                                 | 4.27E-02                                           | <sup>b</sup> 37                                       |
| Thiacloprid      | 1.438                                        | 8.1                                    | 1000                                              | 10.33                                           | 1.51E-04                                                 | N.A.                                               | 2398                                                  |

<sup>a</sup> using the OECD screening tool for LRT<sup>65</sup> input data as listed with estimated values for log K<sub>OW</sub> and log K<sub>AW</sub><sup>36</sup>; global annual mean = 0.75e6 OH cm<sup>-3</sup><sup>36</sup>; experimental values for half-lives in soil. <sup>b</sup> T=298 K; <sup>c</sup> T=292 K; <sup>d</sup> T=294 K; <sup>e</sup> T=293 K; N.A. = not applicable

(C)

| Pesticide       | Half-life in air (hours, 25°C) <sup>36</sup> | Half-life in soil (days) <sup>57</sup> | Half-life in water at pH = 7 (days) <sup>57</sup> | log K <sub>OA</sub> (25°C) (est.) <sup>36</sup> | Saturation vapor pressure (25°C, Pa, est.) <sup>36</sup> | Saturation vapor pressure (Pa, exp.) <sup>36</sup> | Characteristic travel distance (CTD, km) <sup>a</sup> |
|-----------------|----------------------------------------------|----------------------------------------|---------------------------------------------------|-------------------------------------------------|----------------------------------------------------------|----------------------------------------------------|-------------------------------------------------------|
| Boscalid        | 14.194                                       | 254                                    | 5                                                 | 12.72                                           | 9.19E-09                                                 | N.A.                                               | 73                                                    |
| Carbendazim     | 0.64                                         | 22                                     | 7.9                                               | 10.58                                           | 7.25E-07                                                 | 1.00E-07 <sup>b</sup>                              | 20                                                    |
| Cyprodinil      | 0.641                                        | 45                                     | 12.5                                              | 9.46                                            | 5.31E-03                                                 | 4.91E-05 <sup>c</sup>                              | 31                                                    |
| Difenoconazole  | 5.95                                         | 91.8                                   | 3                                                 | 13.71                                           | 2.42E-06                                                 | 3.33E-08 <sup>c</sup>                              | 142                                                   |
| Dimethomorph    | 1.203                                        | 44                                     | 10                                                | 10.77                                           | 2.57E-07                                                 | 9.84E-07 <sup>c</sup>                              | 25                                                    |
| Epoxiconazole   | 14.622                                       | 97.7                                   | 1000                                              | 11.23                                           | 3.75E-05                                                 | N.A.                                               | 2394                                                  |
| Fenpropidin     | 1.137                                        | 49.2                                   | 1.8                                               | 11.87                                           | 2.92E-01                                                 | 1.71E-02 <sup>c</sup>                              | 160                                                   |
| Fenpropimorph   | 0.93                                         | 25.5                                   | 2.65                                              | 8.93                                            | 9.93E-03                                                 | 3.51E-03 <sup>b</sup>                              | 19                                                    |
| Fluazinam       | 3919.2                                       | 25.9                                   | 4.5                                               | 10.68                                           | 7.34E-06                                                 | N.A.                                               | 205                                                   |
| Flusilazole     | 20.83                                        | 94                                     | 1                                                 | 8.38                                            | 2.55E-03                                                 | 3.91E-05 <sup>c</sup>                              | 384                                                   |
| Iprovalicarb    | 2.397                                        | 15.5                                   | 54                                                | 11.07                                           | 2.76E-06                                                 | N.A.                                               | 134                                                   |
| Kresoxim-methyl | 3.356                                        | 1                                      | 0.85                                              | 10.24                                           | 1.67E-04                                                 | 2.29E-06 <sup>b</sup>                              | 51                                                    |
| Metalaxyl       | 4.774                                        | 14.1                                   | 56                                                | 8.63                                            | 7.71E-03                                                 | 7.49E-04 <sup>c</sup>                              | 139                                                   |
| Prochloraz      | 1.645                                        | 68.8                                   | 2                                                 | 10.27                                           | 2.13E-06                                                 | 1.51E-04 <sup>c</sup>                              | 37                                                    |
| Propiconazole   | 5.533                                        | 35.2                                   | 6                                                 | 10.87                                           | 9.95E-04                                                 | 5.60E-05 <sup>c</sup>                              | 80.3                                                  |
| Pyrimethanil    | 0.641                                        | 31.4                                   | 6.7                                               | 8.68                                            | 1.37E-02                                                 | 2.20E-03 <sup>c</sup>                              | 17                                                    |
| Spiroxamine     | 0.999                                        | 52.4                                   | 0.8                                               | 10.87                                           | 3.22E-02                                                 | 1.71E-02 <sup>c</sup>                              | 33                                                    |
| Tebuconazole    | 11.184                                       | 47.1                                   | 1.775                                             | 11.93                                           | 6.14E-06                                                 | 1.71E-06 <sup>b</sup>                              | 41                                                    |
| Tetraconazole   | 11.677                                       | 460                                    | 2                                                 | 10.32                                           | 1.10E-02                                                 | 1.80E-04 <sup>b</sup>                              | 108                                                   |

<sup>a</sup> using the OECD screening tool for LRT<sup>65</sup> input data as listed with estimated values for log K<sub>OW</sub> and log K<sub>AW</sub><sup>36</sup>; global annual mean = 0.75e6 OH cm<sup>-3</sup><sup>36</sup>; experimental values for half-lives in soil. <sup>b</sup> T=293 K;

<sup>c</sup> T=298 K; N.A. = not applicable



**Table S12.** Average particulate mass fraction ( $\theta$ , %) of pesticides measured at both rural and polar sites where both phases were sampled

|               | Rural sites |      | Polar sites |             |
|---------------|-------------|------|-------------|-------------|
|               | BKO         | KOS  | ADA         | ZPO         |
| 2,4-D         | <i>N.A.</i> | 100  | 0           | <i>N.A.</i> |
| Carbaryl      | 100         | 73.6 | 0           | <i>N.A.</i> |
| Carbendazim   | 0           | 100  | 0           | 0           |
| Chlorpyrifos  | 0           | 34.7 | 0           | 0           |
| Cyprodinil    | <i>N.A.</i> | 100  | <i>N.A.</i> | 0           |
| Fenpropidin   | <i>N.A.</i> | 100  | <i>N.A.</i> | 0           |
| Fenpropimorph | 100         | 100  | 100         | 0           |
| Pendimethalin | 0           | 28.4 | 0           | 0           |
| Prochloraz    | <i>N.A.</i> | 100  | <i>N.A.</i> | 0           |
| Prosulfocarb  | 0           | 62.6 | <i>N.A.</i> | 0           |
| Spiroxamine   | <i>N.A.</i> | 100  | <i>N.A.</i> | 0           |
| Tebuconazole  | 100         | 100  | 0           | <i>N.A.</i> |
| Terbutylazine | <i>N.A.</i> | 98.8 | <i>N.A.</i> | 0           |
| Thiacloprid   | <i>N.A.</i> | 100  | <i>N.A.</i> | 0           |
| Triallate     | 0           | 0    | 100         | <i>N.A.</i> |

*N.A.*: not applicable

**Table S13.** Selected HPLC-MS/MS experimental parameters, instrumental limits of detection (iLODs) and instrumental limits of quantification (iLOQs)

| Analyte          | Precursor ion (m/z) | Product ion 1 (m/z) | Product ion 2 (m/z) | R <sub>t</sub> (min) | iLOD (ng/mL) | iLOQ (ng/mL) |
|------------------|---------------------|---------------------|---------------------|----------------------|--------------|--------------|
| 2,4-D            | 218.8               | 160.9               | 124.9               | 2.4                  | 0.02         | 0.06         |
| Acetamiprid      | 222.9               | 142.0               | N.A.                | 3.2                  | 0.08         | 0.29         |
| Acetochlor       | 270.1               | 224.2               | 148.1               | 4.9                  | 0.10         | 0.25         |
| Alachlor         | 270.1               | 238.1               | 162.1               | 5.0                  | 0.10         | 0.25         |
| Atrazine         | 216.1               | 174.2               | 68.0                | 3.8                  | 0.01         | 0.03         |
| Azinphos methyl  | 318.0               | 130.0               | 160.0               | 4.1                  | 0.03         | 0.10         |
| Boscalid         | 343.2               | 307.1               | 140.1               | 5.9                  | 0.12         | 0.40         |
| Carbaryl         | 201.9               | 145.0               | 127.1               | 3.0                  | 0.10         | 0.30         |
| Carbendazim      | 192.0               | 160.0               | 131.9               | 1.2                  | 0.03         | 0.05         |
| Carbofuran       | 222.1               | 165.1               | 123.0               | 5.0                  | 0.04         | 0.13         |
| Chloridazon      | 222.0               | 104.0               | 77.0                | 2.3                  | 0.06         | 0.12         |
| Chlorotoluron    | 213.1               | 72.2                | 46.2                | 3.7                  | 0.10         | 0.30         |
| Chlorpyrifos     | 349.9               | 197.9               | 96.9                | 6.7                  | 0.01         | 0.03         |
| Chlorsulfuron    | 357.9               | 141.0               | 167.0               | 3.0                  | 0.01         | 0.03         |
| Cyprodinil       | 226.0               | 93.1                | 108.1               | 5.8                  | 0.11         | 0.36         |
| Diazinon         | 305.0               | 169.0               | 153.1               | 5.4                  | 0.01         | 0.03         |
| Dimethachlor     | 256.1               | 224.0               | 148.1               | 4.0                  | 0.03         | 0.10         |
| Dimethoate       | 230.0               | 198.9               | 124.9               | 2.2                  | 0.03         | 0.10         |
| Disulfoton       | 274.9               | 88.9                | 61.0                | 5.8                  | 0.05         | 0.10         |
| Diuron           | 232.9               | 71.8                | 46.1                | 4.0                  | 0.10         | 0.25         |
| Fenitrothion     | 277.9               | 125.1               | 109.0               | 4.7                  | 0.30         | 1.00         |
| Fenpropidin      | 274.1               | 147.1               | 86.1                | 5.5                  | 0.10         | 0.34         |
| Fenpropimorph    | 304.1               | 147.1               | 117.1               | 2.4                  | 0.01         | 0.03         |
| Fluroxypyr       | 255.0               | 180.9               | 208.9               | 2.7                  | 1.00         | 3.00         |
| Fonofos          | 246.9               | 109.0               | 137.0               | 5.4                  | 0.10         | 0.25         |
| Iprovalicarb     | 321.0               | 119.0               | 203.0               | 6.1                  | 0.10         | 0.32         |
| Isoproturon      | 207.2               | 72.1                | 46.1                | 3.9                  | 0.01         | 0.03         |
| Kresoxim methyl  | 314.0               | 116.1               | 131.1               | 6.3                  | 0.22         | 0.74         |
| Malathion        | 331.0               | 127.0               | 99.0                | 4.5                  | 0.10         | 0.30         |
| Mecoprop         | 212.9               | 141.0               | 71.1                | 2.5                  | 0.02         | 0.07         |
| Metalaxyl        | 280.0               | 220.1               | 192.0               | 5.5                  | 0.12         | 0.41         |
| Metamitron       | 203.0               | 175.1               | 104.0               | 2.2                  | 0.25         | 0.50         |
| Metazachlor      | 278.2               | 134.2               | 210.2               | 3.7                  | 0.03         | 0.05         |
| Metribuzin       | 215.1               | 187.1               | 84.0                | 3.3                  | 0.03         | 0.10         |
| Oxadiazon        | 345.0               | 303.0               | 219.9               | 6.7                  | 0.06         | 0.22         |
| Parathion methyl | 264.0               | 125.0               | 232.0               | 4.0                  | 0.50         | 0.10         |
| Pendimethalin    | 282.2               | 212.0               | 194.2               | 6.4                  | 0.01         | 0.04         |
| Phosalone        | 367.9               | 111.0               | 181.9               | 6.4                  | 0.07         | 0.25         |
| Pirimicarb       | 239.0               | 72.0                | 182.1               | 2.1                  | 0.01         | 0.03         |
| Prochloraz       | 376.0               | 308.0               | 70.0                | 4.9                  | 0.01         | 0.03         |
| Propiconazole    | 342.0               | 159.0               | 69.0                | 5.0                  | 0.03         | 0.10         |
| Prosulfocarb     | 252.0               | 91.1                | 128.1               | 6.6                  | 0.06         | 0.21         |
| Quizalofop ethyl | 273.0               | 299.0               | 271.0               | 6.6                  | 0.03         | 0.10         |
| Simazine         | 202.0               | 132.0               | 124.0               | 3.3                  | 0.01         | 0.03         |
| S-Metolachlor    | 284.1               | 252.2               | 176.1               | 4.9                  | 0.01         | 0.03         |
| Spiroxamine      | 298.1               | 144.2               | 100.0               | 5.6                  | 0.09         | 0.29         |
| Tebuconazole     | 308.1               | 70.0                | 125.0               | 4.9                  | 0.01         | 0.03         |
| Temephos         | 466.9               | 419.0               | 124.9               | 6.3                  | 0.03         | 0.05         |
| Terbufos         | 288.9               | 103.0               | 233.0               | 6.4                  | 0.05         | 0.10         |
| Terbuthylazine   | 230.0               | 174.0               | 96.0                | 4.5                  | 0.01         | 0.03         |
| Thiacloprid      | 252.9               | 126.0               | 90.0                | 4.4                  | 0.04         | 0.14         |

R<sub>t</sub> = retention time

**Table S14.** Selected GC-MS/MS and UPLC-MS/MS experimental parameters, instrumental limits of detection (iLODs) and instrumental limits of quantification (iLOQs)

| Analyte         | Precursor ion<br>(m/z) | Product ion 1<br>(m/z) | Product ion 2<br>(m/z) | R <sub>t</sub><br>(min) | iLOD<br>(ng/mL) | iLOQ<br>(ng/mL) |
|-----------------|------------------------|------------------------|------------------------|-------------------------|-----------------|-----------------|
| 2,4-MCPA        | 199.0                  | 201.0                  | 141.0                  | 2.1                     | N.A.            | 142.80          |
| Aclonifen       | 264.0                  | 194.0                  | N.A.                   | 17.9                    | 3.26            | 9.77            |
| Chlorpropham    | 213.1                  | 127.0                  | N.A.                   | 10.0                    | 1.46            | 4.37            |
| Clomazone       | 124.9                  | 88.9                   | N.A.                   | 10.9                    | 1.36            | 4.09            |
| Cypermethrin    | 163.0                  | 127.0                  | N.A.                   | 25.7                    | 1.19            | 3.57            |
| Diclofop-methyl | 253.0                  | 162.2                  | N.A.                   | 19.6                    | 4.57            | 13.70           |
| Difenoconazole  | 323.1                  | 265.0                  | N.A.                   | 28.2                    | 1.46            | 4.37            |
| Diflufenican    | 394.1                  | 266.1                  | N.A.                   | 19.6                    | 0.45            | 1.34            |
| Dimethenamid-P  | 230.0                  | 154.4                  | N.A.                   | 12.2                    | 1.36            | 4.09            |
| Dimethomorph    | 301.1                  | 165.1                  | N.A.                   | 29.3                    | 2.47            | 7.41            |
| Epoxiconazole   | 191.9                  | 138.0                  | N.A.                   | 19.9                    | 0.59            | 1.78            |
| Esbiothrin      | 123.0                  | 81.1                   | N.A.                   | 14.9                    | 3.52            | 10.55           |
| Fenoxycarb      | 186.1                  | 109.1                  | N.A.                   | 20.9                    | 6.75            | 20.26           |
| Fipronil        | 367.0                  | 213.0                  | N.A.                   | 14.6                    | 0.74            | 2.23            |
| Fluazinam       | 462.9                  | 415.9                  | 398.0                  | 2.3                     | N.A.            | 26.28           |
| Flumioxazin     | 354.1                  | 176.1                  | N.A.                   | 27.3                    | 2.72            | 8.17            |
| Flurochloridone | 311.0                  | 174.1                  | N.A.                   | 14.0                    | 0.45            | 1.34            |
| Flusilazole     | 233.1                  | 183.1                  | N.A.                   | 16.7                    | 0.68            | 2.04            |
| Lenacil         | 152.9                  | 136.2                  | N.A.                   | 18.9                    | 1.46            | 4.37            |
| Linuron         | 248.0                  | 61.0                   | N.A.                   | 13.3                    | 3.86            | 11.59           |
| Permethrin      | 183.0                  | 165.0                  | N.A.                   | 24.1                    | 0.59            | 1.78            |
| Pyrimethanil    | 198.1                  | 118.1                  | N.A.                   | 11.4                    | 1.19            | 3.57            |
| Sulcotrione     | 329.0                  | 293.0                  | 139.0                  | 2.17                    | N.A.            | 67.5            |
| Tetraconazole   | 336.0                  | 204.0                  | N.A.                   | 13.8                    | 0.59            | 1.78            |
| Triallate       | 267.9                  | 184.0                  | N.A.                   | 11.7                    | 0.89            | 2.68            |

R<sub>t</sub> = retention time; N.A. = not applicable

**Table S15.** Limits of quantifications determined from field blanks (LOQb) (in pg m<sup>-3</sup>)

The average sampled volumes were used to calculate the concentrations (1732 m<sup>3</sup> for HVAS and 114 m<sup>3</sup> for LVAS). The compounds never found in field blanks are not included.

| Analyte          | <i>LOQb value</i>               |                                 |                             |                             |
|------------------|---------------------------------|---------------------------------|-----------------------------|-----------------------------|
|                  | <i>Particulate phase (HVAS)</i> | <i>Particulate phase (LVAS)</i> | <i>Gaseous phase (HVAS)</i> | <i>Gaseous phase (LVAS)</i> |
| 2,4-D            | 0.55                            | 0.44                            | 0.42                        | 6.41                        |
| 2,4-MCPA         | 0.09                            | 0.53                            | <LOD                        | <LOD                        |
| Acetochlor       | 0.96                            | <LOD                            | 0.48                        | 7.38                        |
| Aclonifen        | 0.01                            | 0.4                             | 0.03                        | 0.44                        |
| Carbendazim      | 3                               | 27.67                           | 5.89                        | 89.7                        |
| Carbofuran       | 0.04                            | <LOD                            | 0                           | 0.70                        |
| Chlorpyrifos     | 1.28                            | 2                               | 4.73                        | 71.9                        |
| Cypermethrin     | 0.09                            | 1.49                            | <LOD                        | <LOD                        |
| Cyprodinil       | 0.42                            | 2.6                             | <LOD                        | <LOD                        |
| Diclofop-methyl  | <LOD                            | 0                               | 0.01                        | 0.09                        |
| Difenoconazole   | <LOD                            | 0                               | 0.02                        | 0.26                        |
| Dimethomorph     | 0.01                            | 0                               | <LOD                        | <LOD                        |
| Diuron           | <LOD                            | <LOD                            | 0.18                        | 2.81                        |
| Fenoxycarb       | 0.01                            | 0.18                            | 0.01                        | 0.09                        |
| Fenpropidin      | 0.31                            | 1.49                            | <LOD                        | <LOD                        |
| Fenpropimorph    | 0.27                            | <LOD                            | 2.89                        | 43.9                        |
| Fipronil         | <LOD                            | <LOD                            | 0.01                        | 0.09                        |
| Fluazinam        | 0.24                            | 1.58                            | <LOD                        | <LOD                        |
| Flumioxazin      | 0.01                            | 0.09                            | 0.05                        | 0.79                        |
| Iprovalicarb     | 4.58                            | 45.7                            | 18.0                        | 273                         |
| Kresoxim-methyl  | <LOD                            | <LOD                            | 0.27                        | 4.13                        |
| Lenacil          | <LOD                            | <LOD                            | 0.12                        | 1.84                        |
| Mecoprop         | 0.23                            | <LOD                            | 0.76                        | 11.6                        |
| Metazachlor      | 0.03                            | <LOD                            | 0.38                        | 5.71                        |
| Oxadiazon        | 0.06                            | <LOD                            | <LOD                        | <LOD                        |
| Pendimethalin    | 0.91                            | 2.20                            | 1.58                        | 24.1                        |
| Phosalone        | 0.09                            | <LOD                            | 0.91                        | 13.9                        |
| Pirimicarb       | 0.02                            | <LOD                            | <LOD                        | <LOD                        |
| Propiconazole    | 0.39                            | 0.44                            | 0.58                        | 8.78                        |
| Prosulfocarb     | 1.54                            | 3.43                            | 0.91                        | 13.9                        |
| Quizalofop ethyl | 0.02                            | 0.44                            | <LOD                        | <LOD                        |
| S-Metolachlor    | 2.42                            | 1.41                            | 1.22                        | 18.5                        |
| Spiroxamine      | 0.16                            | 1.23                            | <LOD                        | <LOD                        |
| Tebuconazole     | 0.06                            | 0.88                            | 0.21                        | 3.16                        |
| Terbuthylazine   | 0.64                            | 1.76                            | 0.13                        | 1.93                        |

HVAS = High-volume air sampler; LVAS = Low-volume air sampler

**Table S16.** Recoveries (in %) and standard deviations (SD) of individual herbicides (A), insecticides (B) and fungicides (C) analysed using HPLC-MS/MS determined from spike recovery tests of air sampling media (QFFs and PUF-XAD2-PUF sandwiches, n=5 each)

(A)

| <b>Compounds</b> | <b>QFF</b>                  |           | <b>PUF-XAD2-PUF</b>         |           |
|------------------|-----------------------------|-----------|-----------------------------|-----------|
|                  | <b>Average recovery (%)</b> | <b>SD</b> | <b>Average recovery (%)</b> | <b>SD</b> |
| 2,4-D            | 102                         | 3.8       | 101                         | 5.8       |
| Acetochlor       | 76.3                        | 8.2       | 91                          | 6.9       |
| Alachlor         | 73.9                        | 4.3       | 79.7                        | 5.8       |
| Atrazine         | 72.8                        | 6.9       | 75.6                        | 7.7       |
| Chloridazon      | 61.6                        | 4.1       | 61.1                        | 1.6       |
| Chlorotoluron    | 103                         | 17        | 97.5                        | 3.6       |
| Chlorsulfuron    | 96.6                        | 10        | 46.8                        | 5.3       |
| Dimethachlor     | 83.6                        | 6.5       | 89.3                        | 4.2       |
| Diuron           | 65.4                        | 5.4       | 100                         | 6.8       |
| Fluroxypyr       | 65.4                        | 6.6       | 80.5                        | 8.1       |
| Isoproturon      | 111                         | 19        | 96                          | 4.8       |
| Mecoprop         | 107                         | 4.6       | 105                         | 7.6       |
| Metamitron       | 105                         | 14        | 96.5                        | 6.3       |
| Metazachlor      | 113                         | 19        | 104                         | 4.2       |
| Metribuzin       | 72.4                        | 7         | 70.1                        | 6         |
| Oxadiazon        | 65                          | 37        | 35.5                        | 2.2       |
| Pendimethalin    | 102                         | 15        | 102                         | 7.1       |
| Prosulfocarb     | 106                         | 4.4       | 95.8                        | 8.6       |
| Quizalofop ethyl | 100                         | 1.7       | 100                         | 9.3       |
| Simazine         | 104                         | 19        | 93.4                        | 2.8       |
| S-metolachlor    | 74.4                        | 2.5       | 99.7                        | 6.2       |
| Terbuthylazine   | 103                         | 16        | 86                          | 2.4       |

(B)

| <b>Compounds</b> | <b>QFF</b>                  |           | <b>PUF-XAD2-PUF</b>         |           |
|------------------|-----------------------------|-----------|-----------------------------|-----------|
|                  | <b>Average recovery (%)</b> | <b>SD</b> | <b>Average recovery (%)</b> | <b>SD</b> |
| Acetamiprid      | 101                         | 5.4       | 92.6                        | 5.2       |
| Azinphos methyl  | 77.3                        | 8.8       | 63.8                        | 10        |
| Carbaryl         | 67.6                        | 13        | 83.6                        | 4         |
| Carbofuran       | 102                         | 7.6       | 79.8                        | 4.4       |
| Chlorpyrifos     | 77.8                        | 7.3       | 68.8                        | 3.8       |
| Diazinon         | 61.4                        | 16        | 34.1                        | 13        |
| Dimethoate       | 78.4                        | 5.6       | 79                          | 2         |
| Disulfoton       | 66.4                        | 8.8       | 71                          | 7.2       |
| Fenitrothion     | 70                          | 5.2       | 104                         | 15        |
| Fonofos          | 80.6                        | 12        | 56.7                        | 4.3       |
| Malathion        | 98.8                        | 27        | 98.6                        | 11        |
| Parathion methyl | 72.9                        | 13        | 66.8                        | 4.1       |
| Phosalone        | 109                         | 3.9       | 116                         | 5.9       |
| Pirimicarb       | 79.5                        | 15        | 68.6                        | 4.6       |
| Temephos         | 99.9                        | 13        | 57.2                        | 34        |
| Terbufos         | 74.4                        | 4.7       | 47.3                        | 9.2       |
| Thiacloprid      | 103                         | 4.5       | 100                         | 2.4       |

(C)

| <b>Compounds</b> | <b>QFF</b>                  |           | <b>PUF-XAD2-PUF</b>         |           |
|------------------|-----------------------------|-----------|-----------------------------|-----------|
|                  | <b>Average recovery (%)</b> | <b>SD</b> | <b>Average recovery (%)</b> | <b>SD</b> |
| Boscalid         | 78.8                        | 44        | 95.6                        | 20        |
| Carbendazim      | 102                         | 14        | 90.2                        | 3.8       |
| Cyprodinil       | 99.6                        | 6.5       | 104                         | 2.9       |
| Fenpropidin      | 102                         | 4         | 97.8                        | 11        |
| Fenpropimorph    | 152                         | 20        | 62.2                        | 5.5       |
| Iprovalicarb     | 52                          | 27        | 41.4                        | 6.6       |
| Kresoxim methyl  | 72.8                        | 3.4       | 86.4                        | 16        |
| Metalaxyl        | 103                         | 6.4       | 112                         | 7.7       |
| Prochloraz       | 106                         | 17        | 94.4                        | 5.1       |
| Propiconazole    | 109                         | 20        | 103                         | 4.3       |
| Spiroxamine      | 102                         | 3.9       | 98.4                        | 11        |
| Tebuconazole     | 67.9                        | 4.9       | 80.8                        | 5.9       |

**Table S17.** Results of the multiple linear regression statistical analysis applied to the number of pesticides found at each site

| <b>Variable</b>       | <b>P-value</b> | <b>Coefficient</b> |
|-----------------------|----------------|--------------------|
| Latitude              | 0.0002         | -0.55              |
| Site category         | 0.0003         | -4.887             |
| Agricultural area (%) | 0.0242         | 0.242              |



**Table S18.** Summary of pesticides previously quantified in the atmosphere at high mountain sites.

| <b>Pesticide</b>        | <b>CAS number</b> | <b>Reference:</b> | <b>Location (altitude, meter a.s.l.)</b>               | <b>Type of sampler used</b> | <b>Quantified in:</b> |
|-------------------------|-------------------|-------------------|--------------------------------------------------------|-----------------------------|-----------------------|
| Chlorothalonil          | 1897-45-6         | (76)              | Sierra Nevada, California, USA (1920 m)                | Active sampling             | Total                 |
|                         |                   | (77)              | British Columbia and Alberta, Canada (>2000 m)         | Passive sampling            | Gaseous phase         |
| Chlorpyrifos            | 2921-88-2         | (78)              | Sierra Nevada, California, USA (1920 m)                | Active sampling             | Total                 |
|                         |                   | (76)              | Sierra Nevada, California, USA (1920 m)                | Active sampling             | Total                 |
|                         |                   | (77)              | British Columbia and Alberta, Canada (>2000 m)         | Passive sampling            | Gaseous phase         |
|                         |                   | (79)              | Southeast Brazil (2200 - 2470 m)                       | Passive sampling            |                       |
| Cypermethrin            | 52315-07-8        | (79)              | Southeast Brazil (2200 - 2470 m)                       | Passive sampling            |                       |
| Dacthal                 | 1861-32-1         | (77)              | British Columbia and Alberta, Canada (>2000 m)         | Passive sampling            | Gaseous phase         |
| Diazinon                | 333-45-5          | (76)              | Sierra Nevada, California, USA (1920 m)                | Active sampling             | Total                 |
| Ethephon                | 16672-87-0        | (20)              | Col Margherita Atmospheric Observatory, Italy (2543 m) | Active sampling             | Particulate phase     |
| Fosetyl-aluminium       | 39148-24-8        | (20)              | Col Margherita Atmospheric Observatory, Italy (2543 m) | Active sampling             | Particulate phase     |
| Glufosinate             | 51276-47-2        | (20)              | Col Margherita Atmospheric Observatory, Italy (2543 m) | Active sampling             | Particulate phase     |
| Glyphosate              | 1071-83-6         | (20)              | Col Margherita Atmospheric Observatory, Italy (2543 m) | Active sampling             | Particulate phase     |
| Maleic hydrazide        | 123-33-1          | (20)              | Col Margherita Atmospheric Observatory, Italy (2543 m) | Active sampling             | Particulate phase     |
| Methoxychlor            | 72-43-5           | (79)              | Southeast Brazil (2200 - 2470 m)                       | Passive sampling            |                       |
| Pentachloronitrobenzene | 82-68-8           | (77)              | British Columbia and Alberta, Canada (>2000 m)         | Passive sampling            | Gaseous phase         |
| Permethrin              | 52645-53-1        | (79)              | Southeast Brazil (2200 - 2470 m)                       | Passive sampling            |                       |
| Trifluralin             | 1582-09-8         | (76)              | Sierra Nevada, California, USA (1920 m)                | Active sampling             | Total                 |

Total = the gaseous and particulate phases were extracted together, therefore no distinction can be made

## References

- (1) Alexandratos, N.; Bruinsma, J. World Agriculture towards 2030/2050: The 2012 Revision. ESA working paper 12-03; Rome. [www.fao.org/economic/esa](http://www.fao.org/economic/esa) (accessed April 20, 2022).
- (2) FAOSTAT. FAOSTAT: Pesticides use. In FAO.org. [www.fao.org/faostat/en/#data/RP](http://www.fao.org/faostat/en/#data/RP) (accessed March 21, 2022).
- (3) Sharma, A.; Kumar, V.; Shahzad, B.; Tanveer, M.; Sidhu, G. P. S.; Handa, N.; Kohli, S. K.; Yadav, P.; Bali, A. S.; Parihar, R. D.; Dar, O. I.; Singh, K.; Jasrotia, S.; Bakshi, P.; Ramakrishnan, M.; Kumar, S.; Bhardwaj, R.; Thukral, A. K. Worldwide pesticide usage and its impacts on ecosystem. *SN Appl. Sci.* **2019**, *1*, 1446
- (4) Franklin, J.; Atkinson, R.; Howard, P. H.; Orlando, J. J.; Seigneur, C.; Wallington, T. J.; Zetsch, C. Quantitative Determination of Persistence in Air. In *Criteria for Persistence and Long-Range Transport of Chemicals in the Environment*; Klecka, G.; Boethling, B.; Franklin, J.; Grady, L.; Graham, D.; Howard, P. H.; Kannan, K.; Larson, R. J.; Mackay, D.; Muir, D.; van de Meent, D., eds.; SETAC press: Pensacola, 2000; pp 7–62.
- (5) British Crop Protection Council. *The Pesticide Manual: A World Compendium*, 16th ed.; MacBean, C., Ed.; BCPC Publications: Alton, UK, 2012.
- (6) Carvalho, F. P. Pesticides, Environment, and Food Safety. *Food Energy Secur.* **2017**, *6*, 48–60.
- (7) Rico, A.; van den Brink, P. J. Evaluating aquatic invertebrate vulnerability to insecticides based on intrinsic sensitivity, biological traits, and toxic mode of action. *Environ. Toxicol. Chem.* **2015**, *34*, 1907–1917.
- (8) Sanchez-Bayo, F.; Wyckhuys, K. A. G. Worldwide decline of the entomofauna: A review of its drivers. *Biol. Conserv.* **2019**, *232*, 8–27.
- (9) Vorkamp, K.; Riget, F. F. A review of new and current-use contaminants in the Arctic environment: evidence of long-range transport and indications of bioaccumulation. *Chemosphere* **2014**, *111*, 379–395.
- (10) AMAP. AMAP Assessment 2016: Chemicals of Emerging Arctic Concern; Oslo, Norway. [www.amap.no](http://www.amap.no) (accessed March 19, 2023).
- (11) Mostafalou, S.; Abdollahi, M. Pesticides: An update of human exposure and toxicity. *Arch. Toxicol.* **2017**, *91* (2), 549–599.
- (12) van den Berg, F.; Kubiak, R.; Benjey, W. G.; Majewski, M. S.; Yates, S. R.; Reeves, G. L.; Smelt, J. H.; van der Linden, A. M. A. Emission of pesticides into the air. *Water Air Soil Pollut.* **1999**, *115*, 195–218.
- (13) Glotfelty, D. E.; Leech, M. M.; Jersey, J.; Taylor, A. W. Volatilization and wind erosion of soil surface applied atrazine, simazine, alachlor and toxaphene. *J. Agric. Food Chem.* **1989**, *37*, 546–551.
- (14) Davie-Martin, C. L.; Hageman, K. J.; Chin, Y. P.; Rouge, V.; Fujita, Y. Influence of temperature, relative humidity, and soil properties on the soil-air partitioning of semivolatile pesticides: laboratory measurements and predictive models. *Environ. Sci. Technol.* **2015**, *49* (17), 10431–10439.
- (15) Degrendele, C.; Okonski, K.; Melymuk, L.; Landlová, L.; Kukucká, P.; Audy, O.; Kohoutek, J.; Čupr, P.; Klánová, J. Pesticides in the atmosphere: a comparison of gas-particle partitioning and particle size distribution of legacy and current-use pesticides. *Atmos. Chem. Phys.* **2016**, *16* (3), 1531–1544.
- (16) Desert, M.; Ravier, S.; Gille, G.; Quinapallo, A.; Armengaud, A.; Pochet, G.; Savelli, J. L.; Wortham, H.; Quivet, E. Spatial and temporal distribution of current-use pesticides in ambient air of Provence-Alpes-Côte-d’Azur Region and Corsica, France. *Atmos. Environ.* **2018**, *192*, 241–256.
- (17) Lopez, A.; Yusà, V.; Muñoz, A.; Vera, T.; Borràs, E.; Rodenas, M.; Coscollà C. Risk assessment of airborne pesticides in a Mediterranean region of Spain. *Sci. Total Environ.* **2017**, *574*, 724–734.
- (18) Klöppel, H.; Kördel, W. Pesticides volatilisation and exposure of terrestrial ecosystems. *Chemosphere* **1997**, *35* (6), 1271–1289.
- (19) Gkotsis, G.; Nika, M. C.; Nikolopoulou, V.; Alygizakis, N.; Bizani, E.; Aalizadeh, R.; Badry, A.; Chadwick, E.; Cincinelli, A.; Clasen, D.; Danielsson, S.; Dekker, R.; Duke, G.; Drost, W.; Glowacka, N.; Gockener, B.; Jansman, H. A. H.; Juergens, M.; Knopf, B.; Koschorreck, J.; Krone, O.; Martellini, T.;

- Movalli, P.; Persson, S.; Potter, E. D.; Rohner, S.; Roos, A.; O' Rourke, E.; Siebert, U.; Treu, G.; van den Brink, N. W.; Walker, L. A.; Williams, R.; Slobodnik, J.; Thomaidis, N. S. Assessment of Contaminants of Emerging Concern in European apex predators and their prey by LC-QToF MS wide-scope target analysis. *Environ. Int.* **2022**, *170*, 107623.
- (20) Feltracco, M.; Barbaro, E.; Maule, F.; Bortolini, M.; Gabrieli, J.; De Blasi, F.; Cairns, W. R.; Dallo, F.; Zangrando, R.; Barbante, C.; Gambaro, A. Airborne Polar pesticides in rural and mountain sites of north-eastern Italy: an emerging air quality issue. *Environ. Pollut.* **2022**, *308*, 119657.
- (21) Mai, C.; Theobald, N.; Lammel, G.; Hühnerfuss, H. Spatial, Seasonal and vertical distributions of currently-used pesticides in the marine boundary layer of the North Sea. *Atmos. Environ.* **2013**, *75*, 92–102.
- (22) Gao, Y.; Zheng, H.; Xia, Y.; Chen, M.; Meng, X. Z.; Cai, M. Spatial Distributions and seasonal changes of current-use pesticides from the North Pacific to the Arctic Oceans. *J. Geophys. Res.: Atmos.* **2019**, *124* (16), 9716–9729.
- (23) Balmer, J. E.; Morris, A.D.; Hung, H.; Jantunen, L.; Vorkamp, K.; Riget, F.; Evans, M.; Houde, M.; Muir, D. C. G. Levels and trends of current-use pesticides (CUPs) in the Arctic: An updated review, 2010–2018. *Emerging Contam.* **2019**, *5*, 0–88.
- (24) Rohler, L.; Schlabach, M.; Haglund, P.; Breivik, K.; Kallenborn, R.; Bohlin-Nizzetto, P. Non-target and suspect characterisation of organic contaminants in Arctic air - Part 2: Application of a new tool for identification and prioritisation of Chemicals of Emerging Arctic Concern in air. *Atmos. Chem. Phys.* **2020**, *20* (14), 9031–9049.
- (25) IVL, *Nationell Luftövervakning 2019, Report No. C584* Swedish Environmental Research Institute: Stockholm 2021.
- (26) UNEP. Stockholm Convention on Persistent Organic Pollutants (POPs) 2001 <http://chm.pops.int/tabid/208/Default.aspx> (accessed March 20, 2023).
- (27) *European Commission, Regulation No. 107/, Regulation of the European Parliament and of the Council of 21 October 2009 concerning the placing of plant protection products on the market and repealing council directives 79/117/EEC and 91/414/EEC* 2009L3091, 2009.
- (28) Semeena, V. S.; Lammel, G. The significance of the grasshopper effect on the atmospheric distribution of persistent organic substances *Geophys. Res. Lett.* **2005**, *32* (7).
- (29) Bidleman, T. F. Atmospheric processes. *Environ. Sci. Technol.* **1988**, *22* (4), 361–367.
- (30) Borrás, E.; Rodenas, M.; Vazquez, M.; Vera, T.; Muñoz, A. Particulate and gas-phase products from the atmospheric degradation of chlorpyrifos and chlorpyrifos-oxon. *Atmos. Environ.* **2015**, *123*, 112–120.
- (31) Murschell, T.; Farmer, D. K. Atmospheric OH oxidation of three chlorinated aromatic herbicides. *Environ. Sci. Technol.* **2018**, *52* (8), 4583–4591.
- (32) Murschell, T.; Farmer, D. K. Atmospheric OH oxidation chemistry of trifluralin and acetochlor. *Environ. Sci. Process Impacts* **2019**, *21* (4), 650–658.
- (33) Socorro, J.; Durand, A.; Temime-Roussel, B.; Gligorovski, S.; Wortham, H.; Quivet, E. The persistence of pesticides in atmospheric particulate phase: an emerging air quality issue. *Sci. Rep.* **2016**, *6* (1), 33456.
- (34) Socorro, J.; Lakey, P. S. J.; Han, L.; Berkemeier, T.; Lammel, G.; Zetzsch, C.; Pöschl, U.; Shiraiwa, M. Heterogeneous OH oxidation, shielding effects, and implications for the atmospheric fate of terbuthylazine and other pesticides. *Environ. Sci. Technol.* **2017**, *51* (23), 13749–13754.
- (35) Muñoz, A.; Borrás, E.; Vera, T.; Colmenar, I.; Rodenas, M.; Gimeno, C.; Fuentes, E.; Coscollà, C.; Calvete-Sogo, H. Atmospheric degradation of two pesticides mixed with volatile organic compounds emitted by citrus trees. Ozone and secondary organic aerosol production. *Atmos. Environ.* **2023**, *295*, 119541.
- (36) US EPA. *Estimation Programs Interface Suite™ for Microsoft Windows*. United States Environmental Protection Agency: Washington, DC, USA, 2012.
- (37) CORINE Land Cover. European Environment Agency (EEA). © European Union, Copernicus Land Monitoring Service. 2018.
- (38) Lopez, A.; Coscollà, C.; Yusà, V. Evaluation of sampling adsorbents and validation of a LC-HRMS method for determination of 28 airborne pesticides. *Talanta* **2018**, *189*, 211–219.

- (39) Pisso, I.; Sollum, E.; Grythe, H.; Kristiansen, N. I.; Cassiani, M.; Eckhardt, S.; Arnold, D.; Morton, D.; Thompson, R. L.; Groot Zwaafink, C. D.; Evangeliou, N.; Sodemann, H.; Haimberger, L.; Henne, S.; Brunner, D.; Burkhart, J. F.; Fouilloux, A.; Brioude, J.; Philipp, A.; Seibert, P.; Stohl, A. The Lagrangian particle dispersion model FLEXPART Version 10.4. *Geosci. Model Dev.* **2019**, *12* (12), 4955–4997.
- (40) Simon, A.; Belluš, M.; Čatlošova, K.; Derková, M.; Dian, M.; Imrišek, M.; Kaňák, J.; Meri, L.; Neštiak, M.; Vivoda, J. Numerical simulations of June 7, 2020 convective precipitation over Slovakia using deterministic, probabilistic, and convection-permitting approaches. *Idöjaras* **2021**, *125* (4), 571–607.
- (41) Collaud Coen, M. C.; Andrews, E.; Aliaga, D.; Andrade, M.; Angelov, H.; Bukowiecki, N.; Ealo, M.; Fialho, P.; Flentje, H.; Hallar, A. G.; Hooda, R.; Kalapov, I.; Krejci, R.; Lin, N.H.; Marinoni, A.; Ming, J.; Nguyen, N. A.; Pandolfi, M.; Pont, V.; Ries, L.; Rodriguez, S.; Schauer, G.; Sellegri, K.; Sharma, S.; Sun, J.; Tunved, P.; Velasquez, P.; Ruffieux, D. Identification of topographic features influencing aerosol observations at high altitude stations. *Atmos. Chem. Phys.* **2018**, *18* (16), 12289–12313.
- (42) McClure, C. D.; Jaffe, D. A.; Gao, H. Carbon Dioxide in the free troposphere and boundary layer at the Mt. Bachelor Observatory. *Aerosol Air Qual. Res.* **2016**, *16* (3), 717–728.
- (43) Andrews, E.; Ogren, J. A.; Bonasoni, P.; Marinoni, A.; Cuevas, E.; Rodriguez, S.; Sun, J. Y.; Jaffe, D. A.; Fischer, E. V.; Baltensperger, U.; Weingartner, E.; Coen, M. C.; Sharma, S.; Macdonald, A. M.; Leitch, W. R.; Lin, N. H.; Laj, P.; Arsov, T.; Kalapov, I.; Jefferson, A.; Sheridan, P. Climatology of aerosol radiative properties in the free troposphere. *Atmos. Res.* **2011**, *102*, 365–393.
- (44) Herrmann, E.; Weingartner, E.; Henne, S.; Vuilleumier, L.; Bukowiecki, N.; Steinbacher, M.; Conen, F.; Collaud Coen, M. C.; Hammer, E.; Juranyi, Z.; Baltensperger, U.; Gysel, M. Analysis of long-term aerosol size distribution data from Jungfraujoch with emphasis on free tropospheric conditions, cloud influence, and air mass transport. *J. Geophys. Res.* **2015**, *120* (18), 9459–9480.
- (45) Poltera, Y.; Martucci, G.; Collaud Coen, M. C.; Hervo, M.; Emmenegger, L.; Henne, S.; Brunner, D.; Haeefe, A. PathfinderTURB: An automatic boundary layer algorithm. Development, validation and application to study the impact on in situ measurements at the Jungfraujoch. *Atmos. Chem. Phys.* **2017**, *17* (16), 10051–10070.
- (46) Lotteraner, C.; Piringer, M. Mixing-height time series from operational ceilometer aerosol-layer heights. *Boundary Layer Meteorol.* **2016**, *161* (2), 265–287.
- (47) Frank, G.; Salvamoser, J.; Steinkopff, T. Radon-222 and Beryllium-7 as natural tracer, 2019 URL: <https://www.dach2019.de/DACH2019-abstracts.pdf> (accessed April 02, 2023).
- (48) Thomas, W. *Personal Communication* DWD: Hohenpeißenberg, Germany; 2022.
- (49) Maturilli, M. Ceilometer cloud base eight from station Ny-Alesund (2017–08 et Seq). 2022.
- (50) Commission Decision 2004/248/EC of 10 March 2004 Concerning the Non-Inclusion of Atrazine in Annex I to Council Directive 91/414/EEC and the Withdrawal of Authorisations for Plant Protection Products Containing this Active Substance, 2004.
- (51) Chernyak, S. M.; Rice, C. P.; McConnell, L. L. Evidence of currently-used pesticides in air, ice, fog, seawater and surfacemicrolayer in the Bering and Chukchi Seas. *Mar. Pollut. Bull.* **1996**, *32* (5), 410–419.
- (52) Muir, D. C. G.; Teixeira, C.; Wania, F. Empirical and modelling evidence of regional atmospheric transport of current-use pesticides. *Environ. Toxicol. Chem.* **2004**, *23* (10), 2421–2432.
- (53) Fuhrmann, S.; Klánová, J.; Příbylová, P.; Kohoutek, J.; Dalvie, M. A.; Rössli, M.; Degrendele, C. Qualitative Assessment of 27 current-use pesticides in air at 20 sampling sites across Africa. *Chemosphere* **2020**, *258*, 127333.
- (54) Jablonowski, N. D.; Schaffer, A.; Burauel, P. Still present after all these years: persistence plus potential toxicity raise questions about the use of atrazine. *Environ. Sci. Pollut. Res.* **2011**, *18* (2), 328–331.
- (55) Information on Biocides - ECHA. <https://echa.europa.eu/information-on-chemicals/biocidal-active-substances> (accessed Jan. 11, 2023).
- (56) Igel, A. L.; Ekman, A. M. L.; Leck, C.; Tjernstrom, M.; Savre, J.; Sedlar, J. The Free Troposphere as a potential source of Arctic boundary layer aerosol particles. *Geophys. Res. Lett.* **2017**, *44* (13), 7053–7060.
- (57) Lewis, K. A.; Tzilivakis, J.; Warner, D. J.; Green, A. An international database for pesticide risk assessments and management. *Hum. Ecol. Risk Assess.: Int. J.* **2016**, *22* (4), 1050–1064.

- (58) Gotz, C. W.; Scheringer, M.; Macleod, M.; Roth, C. M.; Hungerbühler, K. Alternative approaches for modeling gas-particle partitioning of semivolatile organic chemicals: model development and comparison. *Environ. Sci. Technol.* **2007**, *41* (4), 1272–1278.
- (59) Krejci, R.; Zieger, P. *Personal Communication*; University of Stockholm, 2023.
- (60) Harner, T.; Bidleman, T. F. Octanol-air partition coefficient for describing particle/gas partitioning of aromatic compounds in urban air. *Environ. Sci. Technol.* **1998**, *32*, 1494–1502.
- (61) Meyer, T.; Lei, Y. D.; Muradi, I.; Wania, F. Organic contaminant release from melting snow. 1. Influence of chemical partitioning. *Environ. Sci. Technol.* **2009**, *43* (3), 657–662.
- (62) Atkinson, R. Kinetics and mechanisms of the gas-phase reactions of the hydroxyl radical with organic compounds under atmospheric conditions. *Chem. Rev.* **1985**, *85* (1), 69–201.
- (63) Spivakovsky, C.M.; Logan, J. A.; Montzka, S. A.; Balkanski, Y. J.; Foreman-Fowler, M.; Jones, D. B. A.; Horowitz, L. W.; Fusco, A. C.; Brenninkmeijer, C. A. M.; Prather, M. J.; Wofsy, S. C.; McElroy, M. B. Three-Dimensional Climatological Distribution of Tropospheric OH: Update and evaluation. *J. Geophys. Res.: Atmos.* **2000**, *105* (D7), 8931–8980.
- (64) Lammel, G. Effects of time-averaging climate parameters on predicted multicompartamental fate of pesticides and POPs. *Environ. Pollut.* **2004**, *128* (1–2), 291–302.
- (65) Beyer, A.; Mackay, D.; Matthies, M.; Wania, F.; Webster, E. Assessing long-range transport potential of persistent organic pollutants. *Environ. Sci. Technol.* **2000**, *34* (4), 699–703.
- (66) Bennett, D. H.; McKone, T. E.; Matthies, M.; Kastenber, W. E. General formulation of characteristic travel distance for semivolatile organic chemicals in a multimedia environment. *Environ. Sci. Technol.* **1998**, *32* (24), 4023–4030.
- (67) Mattei, C.; Wortham, H.; Quivet, E. Heterogeneous degradation of Pesticides by OH radicals in the atmosphere: influence of humidity and particle type on the kinetics. *Sci. Total Environ.* **2019**, *664*, 1084–1094.
- (68) Smit, A. A. M. F. R.; van den Berg, F.; Leistra, M. *Estimation Method for the Volatilisation of Pesticides from Fallow Soil, Technical Report 2, Environmental Planning Bureau Series DLO Winand Staring Centre: Wageningen, the Netherlands; 1997.*
- (69) Smit, A. A. M. F. R.; Leistra, M.; van den Berg, F. *Estimation Method for the Volatilisation of Pesticides from Plants, Technical Report 2, Environmental Planning Bureau Series; DLO Winand: Wageningen, the Netherlands, 1998.*
- (70) Nuyttens, D.; Devarrewaere, W.; Verboven, P.; Foque, D. Pesticide-laden dust emission and drift from treated seeds during seed drilling: a review. *Pest. Manag. Sci.* **2013**, *69* (5), 564–575.
- (71) Das, S.; Hageman, K. J. Influence of adjuvants on pesticide soil-air partition coefficients: laboratory measurements and predicted effects on volatilization. *Environ. Sci. Technol.* **2020**, *54* (12), 7302–7308.
- (72) Maggi, F.; Tang, F. H. M.; la Cecilia, D.; McBratney, A. PEST-CHEMGRIDS, global gridded maps of the top 20 crop-specific pesticide application rates from 2015 to 2025. *Sci. Data* **2019**, *6*(1), 170.
- (73) Hulin, M.; Leroux, C.; Mathieu, A.; Gouzy, A.; Berthet, A.; Boivin, A.; Bonicelli, B.; Chubilleau, C.; Hulin, A.; Leoz Garziandia, E.; Mamy, L.; Millet, M.; Pernot, P.; Quivet, E.; Scelo, A. L.; Merlo, M.; Ruelle, B.; Bedos, C. Monitoring of pesticides in ambient air: prioritization of substances. *Sci. Total Environ.* **2021**, *753*, 141722.
- (74) Jepson, P. C.; Murray, K.; Bach, O.; Bonilla, M. A.; Neumeister, L. Selection of pesticides to reduce human and environmental health risks: a global guideline and minimum pesticides list. *The Lancet Planet. Health* **2020**, *4*(2), e56–e63.
- (75) EU Pesticides Database - Active substances. <https://ec.europa.eu/food/plant/pesticides/eu-pesticides-database/start/screen/active-substances> (accessed Nov. 1st 2023).
- (76) Lenoir, J. S.; McConnell, L. L.; Fellers, G. M.; Cahill, T. M.; Seiber, J. N. Summertime transport of current-use pesticides from California's central valley to the Sierra Nevada mountain range, USA. *Environ. Toxicol. Chem.* **1999**, *18*(12), 2715–2722.
- (77) Daly, G. L.; Lei, Y. D.; Teixeira, C.; Muir, D. C. G.; Wania, F. Pesticides in western Canadian mountain air and soil. *Environ. Sci. Technol.* **2007**, *41*(17), 6020–6025

- (78) Aston, L. S.; Seiber, J. N. Fate of Summertime Airborne organophosphate pesticide residues in the Sierra Nevada mountains. *J. Environ. Qual.* **1997**, 26(6), 1483–1492.
- (79) Guida, Y. de S.; Meire, R. O.; Torres, J. P. M.; Malm, O. Air Contamination by legacy and current-use pesticides in brazilian mountains: an overview of national regulations by monitoring pollutant presence in pristine areas. *Environmental Pollution* **2018**, 242, 19–30.
